# Supplementary material for: Predicting the prognosis in patients with sepsis by an endoplasmic reticulum stress gene signature
Source: publisher site journal article supplement (doi:10.18632/aging.205252), 2023-11-25
Supplement: Supplementary file [file aging-v15i22-205252-supplementary-material-SD3.pdf]

**Supplementary Table 2. Selected of survival related ERGs by univariate analysis.**

| <b>Gene symbol</b> | <b>HR</b> | <b>95% CI</b> | <b>P-value</b> |
|--------------------|-----------|---------------|----------------|
| ABCA1              | 0.805     | 0.680-0.952   | 0.012          |
| ABCG1              | 0.697     | 0.520-0.934   | 0.016          |
| ADRB2              | 0.558     | 0.392-0.795   | 0.001          |
| AKAP9              | 0.503     | 0.256-0.991   | 0.047          |
| AMFR               | 1.450     | 1.097-1.917   | 0.009          |
| ANK1               | 1.218     | 1.033-1.435   | 0.019          |
| ANXA2              | 0.578     | 0.406-0.823   | 0.002          |
| ATF6               | 0.521     | 0.330-0.821   | 0.005          |
| ATM                | 0.356     | 0.192-0.660   | 0.001          |
| ATR                | 0.378     | 0.158-0.903   | 0.029          |
| BCL2L1             | 1.262     | 1.012-1.573   | 0.039          |
| BSG                | 1.506     | 1.124-2.020   | 0.006          |
| CAPN2              | 0.634     | 0.405-0.993   | 0.046          |
| CASP4              | 0.553     | 0.394-0.777   | 0.001          |
| CD74               | 0.619     | 0.469-0.818   | 0.001          |
| CREB1              | 0.556     | 0.328-0.941   | 0.029          |
| DHCR7              | 1.408     | 1.097-1.805   | 0.007          |
| EIF2AK1            | 1.486     | 1.094-2.018   | 0.011          |
| ERP29              | 0.667     | 0.446-0.998   | 0.049          |
| FAM120A            | 0.441     | 0.243-0.799   | 0.007          |
| FKBP1B             | 1.477     | 1.179-1.849   | 0.001          |
| FOXO1              | 0.609     | 0.403-0.920   | 0.018          |
| FOXO3              | 1.405     | 1.076-1.835   | 0.012          |
| FURIN              | 1.682     | 1.102-2.567   | 0.016          |
| GABARAPL2          | 1.624     | 1.026-2.569   | 0.038          |
| GRAMD1A            | 0.669     | 0.482-0.929   | 0.016          |
| HERPUD2            | 0.605     | 0.407-0.898   | 0.013          |
| HLA-DRB1           | 0.688     | 0.552-0.857   | 0.001          |
| JAGN1              | 0.593     | 0.361-0.976   | 0.040          |
| KCNJ2              | 0.716     | 0.571-0.897   | 0.004          |
| LDLR               | 1.490     | 1.126-1.972   | 0.005          |
| MAOA               | 1.408     | 1.174-1.689   | 0.000          |
| MAPK14             | 0.709     | 0.509-0.988   | 0.042          |
| MIR21              | 0.557     | 0.413-0.750   | 0.000          |
| MPO                | 1.254     | 1.099-1.431   | 0.001          |
| NLRP1              | 0.663     | 0.466-0.945   | 0.023          |
| NLRP3              | 0.649     | 0.446-0.944   | 0.024          |
| PCSK6              | 1.482     | 1.079-2.036   | 0.015          |
| PDZD8              | 1.793     | 1.215-2.644   | 0.003          |
| PRKCD              | 0.555     | 0.365-0.844   | 0.006          |
| PTEN               | 0.646     | 0.449-0.928   | 0.018          |
| QDPR               | 0.497     | 0.266-0.930   | 0.029          |
| SCAP               | 0.380     | 0.203-0.712   | 0.003          |
| SELP               | 1.301     | 1.035-1.636   | 0.024          |
| SGK1               | 0.698     | 0.530-0.919   | 0.010          |
| SLC2A1             | 1.697     | 1.348-2.135   | 0.000          |
| SLC8A1             | 0.787     | 0.630-0.985   | 0.036          |
| STIM2              | 0.395     | 0.193-0.808   | 0.011          |
| SVIP               | 1.432     | 1.096-1.871   | 0.009          |
| TAP2               | 0.650     | 0.487-0.867   | 0.003          |
| TAPBPL             | 0.582     | 0.372-0.908   | 0.017          |
| TARDBP             | 0.520     | 0.328-0.825   | 0.006          |
| TEX2               | 1.843     | 1.274-2.666   | 0.001          |
| TFRC               | 1.514     | 1.242-1.846   | 0.000          |
| TGM2               | 1.740     | 1.251-2.421   | 0.001          |
| THBS1              | 1.399     | 1.116-1.754   | 0.004          |
| TLR4               | 0.637     | 0.473-0.859   | 0.003          |

|           |       |             |       |
|-----------|-------|-------------|-------|
| TMEM43    | 0.582 | 0.431-0.784 | 0.000 |
| TMX2      | 0.576 | 0.336-0.987 | 0.045 |
| TNFRSF10B | 0.729 | 0.549-0.967 | 0.028 |
| TRAPPC5   | 1.818 | 1.020-3.241 | 0.043 |
| UBXN2B    | 0.666 | 0.499-0.888 | 0.006 |
| VAPA      | 0.483 | 0.290-0.804 | 0.005 |
| ZDHHC2    | 1.451 | 1.019-2.065 | 0.039 |

---
