# Supplementary material for: Predicting the prognosis in patients with sepsis by an endoplasmic reticulum stress gene signature
Source: Aging (Albany NY). 2023 Nov 25;15(22):13434–51. doi: 10.18632/aging.205252 (PMC10713427; doi:10.18632/aging.205252)
Supplement: Supplementary Table 1 [file aging-15-205252-s002.xlsx]

## Sheet: Table S1
Supplementary Table 1. Showed the different expressed genes between healthy control and sepsis.
id	logFC	AveExpr	t	P.Value	adj.P.Val	B
S100A8	1.87456	12.7996	36.9869	1.11263e-175	1.2466e-171	390.757
S100A12	3.37277	11.7336	32.3112	1.87483e-147	1.05028e-143	326.122
NMT2	-1.68586	2.59006	-27.7812	1.33028e-119	4.96816e-116	262.308
EPHX2	-2.19086	2.41591	-26.7542	2.81813e-113	7.89358e-110	247.81
ANXA3	3.89334	9.27507	26.1279	2.00489e-109	4.49255e-106	238.981
GATA3	-1.51169	3.27077	-25.5176	1.11998e-105	2.09138e-102	230.393
C19orf59	4.52687	9.24769	25.3019	2.35168e-104	3.76403e-101	227.363
ARG1	5.46323	8.24014	25.1323	2.56794e-103	3.5964e-100	224.983
P2RY10	-2.72867	2.86113	-24.0982	5.28811e-97	6.58311e-94	210.512
LRRN3	-2.42664	2.524	-23.7706	5.19263e-95	5.81782e-92	205.946
C5orf32	2.72862	11.0471	23.6464	2.94591e-94	3.00054e-91	204.218
PTCH1	-1.24665	2.31967	-23.611	4.82976e-94	4.50939e-91	203.726
GATA2	-1.5851	2.74601	-23.3547	1.72696e-92	1.48837e-89	200.165
CD160	-1.72562	2.65186	-23.2227	1.08568e-91	8.68857e-89	198.335
THEM4	-1.51357	2.54949	-23.1184	4.63873e-91	3.46482e-88	196.89
ABLIM1	-2.01404	4.15589	-23.0739	8.61699e-91	6.03404e-88	196.273
CD96	-1.76184	3.00224	-22.9907	2.73767e-90	1.80429e-87	195.123
DCAF16	-1.11281	2.7753	-22.9654	3.89318e-90	2.42329e-87	194.772
CCR6	-1.30307	2.62408	-22.9354	5.90887e-90	3.48436e-87	194.357
NELL2	-2.16604	3.03031	-22.5768	8.52629e-88	4.59371e-85	189.408
PJA1	-1.41225	2.64904	-22.5761	8.61014e-88	4.59371e-85	189.398
FAM102A	-1.89739	3.99958	-22.5013	2.42421e-87	1.23458e-84	188.368
FBXL16	-1.98472	2.99686	-22.1666	2.46505e-85	1.2008e-82	183.767
OSGEPL1	-1.42818	2.36049	-22.1244	4.41406e-85	2.06063e-82	183.187
TBC1D4	-1.89047	2.71308	-21.8552	1.79179e-83	8.03008e-81	179.501
IKZF2	-1.46693	2.31518	-21.8376	2.28329e-83	9.83924e-81	179.259
NAT10	-0.941114	2.83404	-21.8197	2.91897e-83	1.21127e-80	179.015
LEF1	-2.17828	2.99725	-21.7853	4.67684e-83	1.8714e-80	178.546
C2orf89	-2.51996	3.08921	-21.6812	1.9529e-82	7.54494e-80	177.123
KLF12	-1.04898	2.96867	-21.5361	1.42492e-81	5.32159e-79	175.145
SBK1	-1.87004	3.89493	-21.5111	2.00677e-81	7.25287e-79	174.804
ZNF549	-1.04244	2.4857	-21.4474	4.79535e-81	1.67897e-78	173.937
POLR1B	-1.39423	2.88427	-21.4418	5.17518e-81	1.75705e-78	173.861
PLEKHA1	-1.87192	3.10998	-21.4368	5.54207e-81	1.82627e-78	173.793
KIAA0748	-1.87267	3.5929	-21.4258	6.43567e-81	2.06015e-78	173.644
TTC27	-1.30463	2.5738	-21.4023	8.87375e-81	2.76171e-78	173.324
TXN	1.77507	8.82205	21.3492	1.83223e-80	5.5482e-78	172.603
CSRP2BP	-1.00699	2.77068	-21.3319	2.3229e-80	6.84889e-78	172.367
SIRPG	-1.625	2.89644	-21.3004	3.56841e-80	1.02514e-77	171.939
KIAA0182	-1.58374	3.36055	-21.2869	4.29401e-80	1.20275e-77	171.755
DYRK2	-2.01496	3.16546	-21.0969	5.71771e-79	1.56247e-76	169.178
NR1D2	-1.28775	2.63959	-20.9742	3.03231e-78	8.08904e-76	167.518
FAM50B	-0.977812	2.69165	-20.9714	3.14941e-78	8.20604e-76	167.48
MAN1C1	-0.883007	2.7089	-20.8198	2.46446e-77	6.27541e-75	165.432
PAFAH2	-1.19087	3.46065	-20.7646	5.20753e-77	1.29656e-74	164.688
UBASH3A	-1.87628	3.02343	-20.7554	5.90089e-77	1.43725e-74	164.563
BCKDHB	-1.25385	3.67894	-20.7522	6.16222e-77	1.46897e-74	164.52
MTR	-1.28743	3.00937	-20.7484	6.48132e-77	1.51285e-74	164.47
RNASEN	-1.22925	2.90234	-20.733	7.99053e-77	1.82706e-74	164.262
FAM43A	-1.66936	3.33428	-20.7237	9.06343e-77	2.03093e-74	164.136
PRKCQ	-1.8996	3.27022	-20.6825	1.58252e-76	3.47659e-74	163.582
RNF125	-1.48357	3.21275	-20.5532	9.08858e-76	1.95824e-73	161.842
KDM2B	-0.826573	2.96652	-20.5376	1.12244e-75	2.37279e-73	161.632
PAQR8	-1.33038	3.72605	-20.5226	1.37297e-75	2.84866e-73	161.431
ZNHIT6	-1.3304	2.76786	-20.4826	2.35806e-75	4.80357e-73	160.893
RABL2A	-1.3741	3.19089	-20.3766	9.831e-75	1.9669e-72	159.472
SIGLECP3	-1.01324	2.78771	-20.2078	9.5311e-74	1.87345e-71	157.211
NLRC3	-2.40325	4.6353	-20.1998	1.06033e-73	2.03569e-71	157.105
SIDT1	-1.90793	3.3372	-20.199	1.07199e-73	2.03569e-71	157.094
RABL2B	-1.41467	3.16562	-20.0764	5.55254e-73	1.03684e-70	155.457
BACH2	-1.75303	2.80719	-19.9951	1.6517e-72	3.03372e-70	154.372
FLT3LG	-1.65474	3.07512	-19.9704	2.29911e-72	4.15471e-70	154.043
IL11RA	-1.28869	3.18846	-19.922	4.38814e-72	7.80392e-70	153.4
PATZ1	-0.894308	2.83788	-19.8895	6.77703e-72	1.1864e-69	152.968
TIGIT	-1.21683	2.60087	-19.798	2.3013e-71	3.96674e-69	151.751
SLC7A6	-1.44173	3.04512	-19.7649	3.57813e-71	6.07415e-69	151.312
UPP1	1.79893	6.52888	19.7387	5.07048e-71	8.47905e-69	150.965
STMN3	-1.98326	3.65384	-19.7219	6.34619e-71	1.04563e-68	150.741
GCET2	-1.23692	2.7125	-19.6793	1.11935e-70	1.81757e-68	150.177
ABHD15	-1.08729	2.73639	-19.6032	3.08194e-70	4.93286e-68	149.169
TAF3	-0.800049	2.98099	-19.5996	3.23252e-70	5.10101e-68	149.121
SAMD3	-1.85266	3.13201	-19.5983	3.29008e-70	5.11973e-68	149.104
SSBP2	-1.38885	3.24442	-19.5871	3.81741e-70	5.85894e-68	148.956
NPAT	-1.1907	4.14151	-19.5487	6.35761e-70	9.62577e-68	148.448
C12orf65	-1.18304	3.24973	-19.5028	1.16916e-69	1.74657e-67	147.842
METTL9	1.90888	8.33107	19.4976	1.25244e-69	1.84636e-67	147.773
GAL3ST4	-1.35225	2.4926	-19.4669	1.88282e-69	2.73962e-67	147.368
SGK223	-1.4563	5.30169	-19.4424	2.60501e-69	3.72001e-67	147.045
PTGDR	-1.02053	2.18247	-19.4419	2.623e-69	3.72001e-67	147.038
ANAPC1	-1.39737	3.65709	-19.407	4.1647e-69	5.83267e-67	146.578
GLOD4	-1.45013	3.29903	-19.4043	4.31996e-69	5.97541e-67	146.541
RFTN1	-1.60311	3.87012	-19.4019	4.45774e-69	6.0908e-67	146.51
GADD45A	3.49825	7.86616	19.3266	1.2083e-68	1.63106e-66	145.518
EVL	-2.16367	4.09669	-19.2469	3.4662e-68	4.62325e-66	144.469
TCTN1	-1.26256	2.85326	-19.234	4.107e-68	5.41351e-66	144.3
PARP1	-1.42714	3.54259	-19.1715	9.37533e-68	1.22141e-65	143.479
DDHD2	-1.26438	3.1435	-19.1392	1.43543e-67	1.84857e-65	143.055
TMEM109	-0.878923	3.69804	-19.1099	2.11361e-67	2.69102e-65	142.67
CLEC4D	4.31003	7.26441	19.0833	2.99878e-67	3.7751e-65	142.322
PID1	-1.98917	2.90645	-19.0069	8.19826e-67	1.02059e-64	141.321
RASGRP1	-1.76764	3.85586	-18.9746	1.2525e-66	1.54209e-64	140.9
HEATR2	-1.30347	3.18061	-18.9362	2.07555e-66	2.52766e-64	140.397
TTC3	-1.61433	4.03707	-18.9228	2.47495e-66	2.98165e-64	140.222
FCER1A	-3.42962	3.47786	-18.9192	2.59372e-66	3.09149e-64	140.175
FBXO21	-1.63007	3.47752	-18.8934	3.63921e-66	4.29197e-64	139.838
EOMES	-2.07434	3.27105	-18.8774	4.49054e-66	5.24084e-64	139.629
SART3	-1.25478	4.30086	-18.8216	9.33003e-66	1.06829e-63	138.901
KLRG1	-2.58591	3.4463	-18.8215	9.34416e-66	1.06829e-63	138.9
INPP4B	-1.08533	2.72174	-18.8155	1.01104e-65	1.14421e-63	138.822
C19orf29	-0.921469	3.57373	-18.8099	1.08715e-65	1.21804e-63	138.749
RBM14	-0.861469	3.80158	-18.8005	1.22921e-65	1.36357e-63	138.627
CKAP4	2.06263	9.18684	18.7889	1.43169e-65	1.57261e-63	138.475
CD6	-1.82735	3.13722	-18.7513	2.34216e-65	2.54773e-63	137.986
OXNAD1	-1.32941	3.58736	-18.747	2.47862e-65	2.67024e-63	137.929
PLCG1	-1.12667	2.70379	-18.739	2.74914e-65	2.93346e-63	137.826
GTPBP3	-1.29016	2.8906	-18.7293	3.12278e-65	3.30072e-63	137.699
HP	4.84268	8.00035	18.7254	3.28538e-65	3.44013e-63	137.649
SMAD3	-1.56832	3.49877	-18.722	3.43431e-65	3.56278e-63	137.605
LYRM7	-0.95066	2.56864	-18.7132	3.85444e-65	3.96194e-63	137.49
DOCK10	-2.08168	4.05953	-18.7014	4.49534e-65	4.57871e-63	137.337
SDAD1	-1.09758	3.74612	-18.686	5.5029e-65	5.50618e-63	137.136
FANCF	-0.715716	2.79201	-18.6859	5.50421e-65	5.50618e-63	137.135
SPN	-1.71644	4.76174	-18.684	5.64543e-65	5.59747e-63	137.11
NUP93	-1.84568	3.62715	-18.6693	6.83981e-65	6.72222e-63	136.919
NCALD	-1.11279	2.6773	-18.6683	6.92644e-65	6.74816e-63	136.907
BCOR	-0.816042	2.50012	-18.649	8.91598e-65	8.6116e-63	136.656
LDOC1L	-1.87166	3.63405	-18.6356	1.06192e-64	1.0169e-62	136.482
TSHZ1	-1.95413	4.00928	-18.6268	1.19183e-64	1.13163e-62	136.367
DHRS3	-2.01022	3.26168	-18.6189	1.31991e-64	1.24271e-62	136.265
ZNF33B	-0.901626	2.42271	-18.6016	1.65461e-64	1.5359e-62	136.04
SYNJ2BP	-0.988558	2.6534	-18.6014	1.65873e-64	1.5359e-62	136.038
MBOAT2	1.5957	6.05415	18.5902	1.91989e-64	1.76315e-62	135.892
DDX24	-1.62805	4.11051	-18.5879	1.97981e-64	1.8034e-62	135.862
LILRA5	2.32928	9.07709	18.5869	2.00352e-64	1.81027e-62	135.85
WDR82	-0.804062	5.09749	-18.5767	2.28906e-64	2.05173e-62	135.717
OSBPL3	-0.920954	2.62987	-18.575	2.34086e-64	2.0815e-62	135.695
BCL11B	-3.27028	4.02884	-18.5611	2.80608e-64	2.47553e-62	135.515
NUP160	-1.12448	2.68343	-18.5553	3.02774e-64	2.65022e-62	135.439
TNFRSF25	-1.40883	3.46184	-18.4981	6.37567e-64	5.53744e-62	134.698
SRPK1	1.57009	7.06759	18.4864	7.41813e-64	6.39328e-62	134.548
BCL2	-1.04667	2.83853	-18.4493	1.20237e-63	1.02835e-61	134.067
CD5	-2.27089	4.24642	-18.4389	1.37582e-63	1.16778e-61	133.933
PASK	-2.17605	2.9365	-18.396	2.40313e-63	2.02441e-61	133.378
MDN1	-1.07542	3.38749	-18.3868	2.70672e-63	2.26314e-61	133.26
MLL	-1.28237	4.08788	-18.348	4.48073e-63	3.71867e-61	132.758
LSG1	-1.02309	3.69515	-18.3379	5.10954e-63	4.20936e-61	132.628
BCL2A1	3.5827	7.9628	18.3332	5.42791e-63	4.439e-61	132.567
MAPK14	1.89139	7.65856	18.3194	6.4939e-63	5.2723e-61	132.389
CD247	-2.15297	4.46971	-18.2804	1.07585e-62	8.67183e-61	131.887
CLIC3	-2.51453	3.12893	-18.2785	1.10232e-62	8.82172e-61	131.863
MTPAP	-0.843336	2.6763	-18.2684	1.25705e-62	9.98862e-61	131.732
SLC22A4	1.72617	8.25408	18.2412	1.78674e-62	1.40976e-60	131.382
SH2D1B	-1.76362	3.03863	-18.2266	2.15931e-62	1.68384e-60	131.194
IL2RB	-3.23359	5.59024	-18.2264	2.16417e-62	1.68384e-60	131.191
PDE4DIP	-1.1492	3.19608	-18.2075	2.76281e-62	2.12499e-60	130.948
SPOCK2	-1.28781	3.57803	-18.2074	2.76909e-62	2.12499e-60	130.946
DPP4	-1.64495	3.01112	-18.1882	3.54801e-62	2.70421e-60	130.7
FAIM3	-2.053	3.83274	-18.1825	3.81807e-62	2.89039e-60	130.627
KIAA1147	-1.05333	2.89889	-18.093	1.21165e-61	9.11098e-60	129.478
HK3	2.38834	8.80906	18.0862	1.32412e-61	9.89031e-60	129.389
PRSS23	-1.16806	2.57924	-18.0754	1.52142e-61	1.12887e-59	129.251
MMP9	3.01503	11.1433	18.072	1.59018e-61	1.17213e-59	129.207
IRAK3	2.65734	7.37111	18.0619	1.8093e-61	1.32493e-59	129.079
ELAC2	-0.945974	3.97854	-18.0552	1.97387e-61	1.43605e-59	128.992
SYTL2	-1.58824	2.59674	-18.0454	2.24021e-61	1.61931e-59	128.866
TRD@	-1.08004	3.57948	-18.0295	2.74675e-61	1.97273e-59	128.663
C16orf80	-1.29937	3.71599	-18.0185	3.16795e-61	2.26075e-59	128.522
INADL	-0.641193	2.36939	-18.0158	3.27975e-61	2.32571e-59	128.487
LBH	-1.77133	3.84878	-18.008	3.62369e-61	2.55345e-59	128.388
MAP3K4	-1.50755	3.38472	-18.0003	4.00207e-61	2.80245e-59	128.289
ZNF529	-1.61148	2.94745	-17.9935	4.36543e-61	3.0379e-59	128.203
IL1R2	3.63322	10.6939	17.9596	6.75541e-61	4.67207e-59	127.768
TCTN3	-0.970481	2.56722	-17.9473	7.91499e-61	5.44046e-59	127.611
MYL6	0.903273	7.98177	17.9347	9.29812e-61	6.3522e-59	127.45
PRR5L	-1.58834	3.04002	-17.9064	1.33873e-60	9.09039e-59	127.088
PRPF19	-1.48066	4.61613	-17.8875	1.70626e-60	1.15162e-58	126.846
DOCK9	-0.783955	2.81786	-17.8785	1.91341e-60	1.2837e-58	126.732
BCL9L	-1.05906	3.69849	-17.8456	2.91967e-60	1.94714e-58	126.312
TRAF5	-2.39776	3.94531	-17.8253	3.78875e-60	2.51178e-58	126.053
CCR3	-3.11997	4.00404	-17.824	3.84965e-60	2.53715e-58	126.037
CDK5RAP1	-0.895855	3.20197	-17.7953	5.56539e-60	3.64647e-58	125.67
GYG1	2.83781	8.84112	17.7578	8.99334e-60	5.85822e-58	125.193
TXK	-1.98771	3.73615	-17.7546	9.36736e-60	6.06658e-58	125.152
INTS9	-0.699272	2.87615	-17.7383	1.15381e-59	7.42945e-58	124.945
TCF7	-1.87064	3.90461	-17.7299	1.2837e-59	8.21862e-58	124.839
DNMT1	-1.62984	5.56745	-17.6898	2.14293e-59	1.36417e-57	124.329
CYB561	-1.12604	3.11462	-17.6822	2.36146e-59	1.49479e-57	124.233
MYST4	-0.886347	2.77537	-17.6778	2.49847e-59	1.57263e-57	124.176
GSPT2	-0.698576	2.7881	-17.6772	2.51777e-59	1.57593e-57	124.169
SERPINB1	1.81546	10.3964	17.6515	3.49502e-59	2.17546e-57	123.842
NIPAL3	-1.89604	4.03165	-17.6493	3.59445e-59	2.22499e-57	123.815
ITFG2	-0.906794	2.97766	-17.6456	3.77097e-59	2.32143e-57	123.767
CNNM3	-0.965228	3.54723	-17.6347	4.33367e-59	2.65325e-57	123.629
CD3E	-1.55928	2.81737	-17.6187	5.31241e-59	3.22916e-57	123.426
LY9	-1.76118	3.1843	-17.6184	5.33197e-59	3.22916e-57	123.422
TRIB2	-1.68271	3.36911	-17.6141	5.6313e-59	3.3921e-57	123.368
USP32	1.13682	6.52463	17.604	6.40894e-59	3.83988e-57	123.239
MAPRE2	-0.782735	3.4662	-17.5705	9.81867e-59	5.85151e-57	122.815
BTBD11	-1.33285	2.75636	-17.5653	1.04905e-58	6.21879e-57	122.749
METT10D	-1.07222	3.0158	-17.5416	1.41797e-58	8.36157e-57	122.449
ZNF573	-1.99974	3.5082	-17.5388	1.47022e-58	8.62428e-57	122.413
RCAN3	-1.05624	2.77438	-17.5332	1.57833e-58	9.21022e-57	122.343
ZAP70	-1.13552	3.186	-17.5261	1.72815e-58	1.00322e-56	122.253
ZDHHC3	1.27246	5.68974	17.5065	2.21731e-58	1.28056e-56	122.005
ZFP64	-1.20827	3.19609	-17.4963	2.52435e-58	1.4504e-56	121.876
SMYD4	-1.11047	2.94702	-17.4928	2.63957e-58	1.50886e-56	121.831
NOLC1	-1.21235	3.6167	-17.4856	2.89295e-58	1.64531e-56	121.74
TADA1	-0.815468	2.61335	-17.4779	3.18802e-58	1.80397e-56	121.643
LIMA1	-0.921645	2.51998	-17.4757	3.27851e-58	1.84585e-56	121.616
C1orf107	-0.651202	2.77209	-17.4696	3.54398e-58	1.98534e-56	121.538
TCERG1	-1.02373	2.95986	-17.4523	4.41547e-58	2.46124e-56	121.319
SSRP1	-1.12355	3.91329	-17.4358	5.44169e-58	3.01825e-56	121.112
CD28	-0.900936	2.52753	-17.4187	6.76258e-58	3.73241e-56	120.895
TARSL2	-0.810949	2.53368	-17.4129	7.2785e-58	3.99747e-56	120.822
DNAJC30	-0.912941	3.11453	-17.4003	8.54046e-58	4.66767e-56	120.663
WBP11	-0.742183	3.6725	-17.3935	9.30805e-58	5.06249e-56	120.578
DDX18	-1.37078	4.53998	-17.3613	1.39959e-57	7.57539e-56	120.172
MCCC2	-1.143	4.78482	-17.356	1.49762e-57	8.06699e-56	120.105
NOV	-1.1307	2.56823	-17.3113	2.63564e-57	1.41291e-55	119.542
FCAR	2.53568	5.78837	17.3048	2.86371e-57	1.52786e-55	119.46
RAB32	1.53547	7.60942	17.2863	3.61676e-57	1.92048e-55	119.228
GOT2	-0.822438	3.22462	-17.2763	4.10553e-57	2.16974e-55	119.102
CLSTN1	-1.21706	3.86347	-17.2748	4.1857e-57	2.20172e-55	119.082
EXOSC10	-1.36179	3.05521	-17.2715	4.36406e-57	2.28481e-55	119.041
IMP3	-1.78821	5.25933	-17.2623	4.90134e-57	2.55417e-55	118.925
FN3KRP	-1.61318	3.78381	-17.2616	4.94383e-57	2.56438e-55	118.917
LRIG1	-1.44166	2.95004	-17.2605	5.01593e-57	2.58979e-55	118.902
MORC2	-1.58719	3.40461	-17.2601	5.04007e-57	2.59032e-55	118.898
COG2	-0.756819	2.78937	-17.2357	6.85676e-57	3.50791e-55	118.591
TTC39C	-1.37396	3.07844	-17.2347	6.94516e-57	3.53698e-55	118.579
HEG1	-0.972204	2.88166	-17.2267	7.6865e-57	3.89681e-55	118.478
LCK	-2.66655	4.08807	-17.2232	8.03253e-57	4.05389e-55	118.434
PRMT7	-0.986548	3.43655	-17.2222	8.13538e-57	4.08739e-55	118.421
TNIK	-1.19172	2.98041	-17.2076	9.77583e-57	4.88966e-55	118.239
SMARCAD1	-0.885407	3.30856	-17.2068	9.88107e-57	4.92033e-55	118.228
KCNA3	-1.47601	3.39917	-17.1858	1.28682e-56	6.37944e-55	117.965
SCRN1	-1.34512	3.5924	-17.1829	1.33542e-56	6.5557e-55	117.928
TRIM32	-0.835088	2.43852	-17.1826	1.33977e-56	6.5557e-55	117.925
DDX47	-1.85238	4.18916	-17.1826	1.33993e-56	6.5557e-55	117.925
ZNF559	-1.07596	3.3082	-17.1605	1.77063e-56	8.6253e-55	117.648
IFFO2	-1.00157	2.75538	-17.148	2.07251e-56	1.00521e-54	117.491
SRRM1	-0.880663	4.59436	-17.1405	2.27933e-56	1.10076e-54	117.397
CHMP7	-1.39121	5.6135	-17.1012	3.73712e-56	1.79703e-54	116.905
CR1	2.26779	7.49317	17.0837	4.65504e-56	2.22885e-54	116.686
BLCAP	-0.944175	6.82357	-17.0789	4.94394e-56	2.3571e-54	116.626
TRIT1	-1.22788	2.89085	-17.0782	4.98934e-56	2.36867e-54	116.617
TTC19	-1.23635	3.80452	-17.0687	5.62098e-56	2.65728e-54	116.499
NCBP2	-1.04065	2.98181	-17.0588	6.36488e-56	2.99631e-54	116.375
ZNF827	-1.03401	2.4811	-17.0563	6.57355e-56	3.08159e-54	116.343
MGA	-1.34863	3.71695	-17.0491	7.19326e-56	3.35805e-54	116.253
FTO	-1.37832	4.77362	-17.0409	7.97282e-56	3.70654e-54	116.151
WWP1	-0.960686	3.0746	-17.0336	8.73806e-56	4.04551e-54	116.06
RNASE2	2.7981	8.41547	17.0215	1.01744e-55	4.69112e-54	115.909
PECI	-1.78519	4.46484	-17.0059	1.23699e-55	5.68001e-54	115.714
LRPPRC	-1.53419	3.29134	-16.9964	1.39361e-55	6.37308e-54	115.596
DDX19A	-1.03769	2.87658	-16.9904	1.50222e-55	6.8418e-54	115.521
GPRASP1	-1.26036	2.6967	-16.9819	1.67265e-55	7.58721e-54	115.414
MRPS18B	-1.1666	3.95934	-16.9805	1.70149e-55	7.6869e-54	115.397
RUVBL1	-1.09464	3.00784	-16.9787	1.74117e-55	7.83456e-54	115.374
ATF7IP2	-1.21043	2.90322	-16.9587	2.23738e-55	1.0027e-53	115.125
ARHGEF3	-1.37888	4.03141	-16.9373	2.92407e-55	1.30523e-53	114.859
ERMP1	-0.760445	3.06712	-16.9248	3.41801e-55	1.51966e-53	114.703
LOC100129637	-1.12567	2.95847	-16.9187	3.68984e-55	1.63403e-53	114.627
MAP4K1	-0.912451	2.97669	-16.9069	4.2802e-55	1.88801e-53	114.48
MAFG	0.987175	5.44821	16.8985	4.75238e-55	2.08806e-53	114.376
HIBADH	-0.870662	2.49686	-16.8977	4.80056e-55	2.10099e-53	114.366
SUMF2	-0.725265	3.43052	-16.8954	4.94361e-55	2.15518e-53	114.336
NFATC2IP	-1.08134	4.41772	-16.8948	4.98097e-55	2.16305e-53	114.329
KCTD7	-1.07685	2.89997	-16.893	5.0944e-55	2.19895e-53	114.307
DCTD	-1.08414	3.75039	-16.8928	5.10289e-55	2.19895e-53	114.305
DIMT1L	-0.8277	2.89359	-16.8762	6.27905e-55	2.69542e-53	114.099
GRINA	1.46891	6.31241	16.8377	1.01615e-54	4.3454e-53	113.62
NAPEPLD	-0.689069	2.35541	-16.8282	1.14403e-54	4.87365e-53	113.502
OGFOD1	-1.40146	4.49155	-16.8251	1.18949e-54	5.04811e-53	113.463
FBXO31	-0.874118	2.76881	-16.8118	1.40439e-54	5.93764e-53	113.298
C14orf169	-0.908325	2.7016	-16.8077	1.47887e-54	6.22903e-53	113.247
C15orf44	-0.838698	2.87762	-16.7947	1.73962e-54	7.29988e-53	113.085
WHAMM	-1.08924	4.3208	-16.7892	1.86335e-54	7.78991e-53	113.017
CLCC1	-1.03141	3.49968	-16.7794	2.10344e-54	8.76094e-53	112.896
GPR18	-2.45123	4.25122	-16.7755	2.21016e-54	9.17136e-53	112.847
WDR3	-0.783023	2.58451	-16.7714	2.32489e-54	9.61185e-53	112.797
GPR183	-2.30753	3.81945	-16.7597	2.68958e-54	1.10787e-52	112.652
PIK3IP1	-1.16256	3.57574	-16.7325	3.77399e-54	1.54886e-52	112.315
EPB41L2	-1.01034	2.43804	-16.7139	4.75706e-54	1.94519e-52	112.085
BUB3	-1.09187	4.8455	-16.711	4.9347e-54	2.01049e-52	112.048
CCDC76	-1.22829	3.32371	-16.708	5.12007e-54	2.07845e-52	112.012
SKAP1	-1.97179	4.46645	-16.6999	5.66695e-54	2.29215e-52	111.911
NUP210	-1.07064	2.97299	-16.6926	6.20664e-54	2.50141e-52	111.82
DYSF	1.85879	7.83854	16.6837	6.92609e-54	2.78136e-52	111.711
ETS1	-1.83033	5.27151	-16.6668	8.55144e-54	3.4218e-52	111.501
ARHGEF18	-1.375	7.42948	-16.6506	1.04523e-53	4.16754e-52	111.302
FCRL3	-2.57496	4.01335	-16.6417	1.16822e-53	4.64139e-52	111.191
MRPS27	-0.791069	2.6289	-16.6336	1.29209e-53	5.1154e-52	111.091
PYHIN1	-1.39259	3.20051	-16.6325	1.30946e-53	5.1659e-52	111.078
FAM78A	-1.37252	6.18889	-16.6248	1.44146e-53	5.66672e-52	110.982
MATK	-1.67526	2.94682	-16.615	1.62825e-53	6.37864e-52	110.861
PABPC4	-1.53737	3.89411	-16.6028	1.89338e-53	7.39143e-52	110.711
PAN2	-1.17004	3.18796	-16.5933	2.13007e-53	8.28655e-52	110.594
PIK3C2B	-1.0142	2.81501	-16.5763	2.63162e-53	1.02023e-51	110.384
NFATC2	-2.33249	5.69646	-16.5714	2.79545e-53	1.08001e-51	110.323
BIN1	-1.5055	4.96575	-16.5629	3.10516e-53	1.19554e-51	110.219
MTA1	-1.03039	2.71437	-16.5529	3.51574e-53	1.34898e-51	110.096
CDKN2D	1.08611	9.16897	16.5521	3.55204e-53	1.35826e-51	110.085
EHBP1	-0.890838	2.60265	-16.526	4.90524e-53	1.86933e-51	109.764
SH3YL1	-1.65343	2.92271	-16.524	5.02921e-53	1.91008e-51	109.739
ATIC	-1.75981	3.50364	-16.506	6.28283e-53	2.37814e-51	109.518
PRKCH	-2.09554	4.59512	-16.5051	6.35592e-53	2.3977e-51	109.507
FLOT1	1.46013	8.64611	16.4997	6.79275e-53	2.55389e-51	109.441
DKC1	-1.44501	4.51756	-16.4947	7.2252e-53	2.7074e-51	109.379
S1PR5	-2.35024	3.60317	-16.4699	9.82014e-53	3.66749e-51	109.074
GZMM	-2.30554	3.93421	-16.4632	1.06663e-52	3.97026e-51	108.992
IKBKAP	-1.15506	3.26518	-16.4611	1.09504e-52	4.06251e-51	108.966
FXN	-0.973903	3.54464	-16.4399	1.42154e-52	5.25147e-51	108.706
NCL	-1.58896	7.12583	-16.4397	1.42489e-52	5.25147e-51	108.704
EP400	-0.597328	3.0909	-16.4286	1.63495e-52	6.0059e-51	108.567
NOL11	-1.39598	3.95613	-16.4248	1.71287e-52	6.27157e-51	108.521
PTER	-1.0077	2.80402	-16.4149	1.93675e-52	7.06818e-51	108.399
RASA3	-0.938504	4.33536	-16.4109	2.03324e-52	7.39623e-51	108.35
ENOSF1	-0.667728	2.81671	-16.3853	2.78858e-52	1.01111e-50	108.036
GPD1L	-0.763254	2.70618	-16.3822	2.89812e-52	1.04744e-50	107.998
RGL4	3.06193	8.7679	16.3661	3.53435e-52	1.27327e-50	107.801
CD55	1.48788	9.47525	16.3427	4.7174e-52	1.69403e-50	107.513
ESYT1	-2.29867	6.13876	-16.3415	4.78307e-52	1.71213e-50	107.5
LETMD1	-1.0238	4.02622	-16.3406	4.83784e-52	1.72622e-50	107.488
CA4	2.80601	7.29423	16.3317	5.39833e-52	1.92009e-50	107.379
PRPS1	-1.20587	4.57893	-16.3291	5.57123e-52	1.97532e-50	107.348
HNRNPA0	-1.51242	5.29324	-16.3254	5.8341e-52	2.062e-50	107.302
ZBTB4	-0.934856	4.54939	-16.3237	5.9536e-52	2.09761e-50	107.282
NDNL2	-1.33377	4.88096	-16.3052	7.4752e-52	2.62546e-50	107.056
CYP20A1	-0.670968	2.99924	-16.2911	8.89614e-52	3.11476e-50	106.883
PTCD3	-0.972035	3.37081	-16.2893	9.09294e-52	3.17375e-50	106.861
PWP2	-1.11798	4.31991	-16.2871	9.34397e-52	3.25124e-50	106.834
ST6GAL1	-2.02909	5.55225	-16.2683	1.17781e-51	4.08552e-50	106.604
ROPN1L	1.92888	7.8604	16.2675	1.18932e-51	4.11271e-50	106.594
CPA3	-1.55073	2.38524	-16.2639	1.24268e-51	4.284e-50	106.55
RFX5	-1.13297	3.11963	-16.2629	1.25779e-51	4.3228e-50	106.538
WDR77	-0.598682	3.37295	-16.2622	1.26839e-51	4.34589e-50	106.53
STK39	-1.41527	4.24372	-16.2569	1.35416e-51	4.62562e-50	106.465
MRE11A	-0.854804	3.49296	-16.2521	1.43616e-51	4.89081e-50	106.406
ARL4C	-2.21838	4.80357	-16.2517	1.44274e-51	4.89831e-50	106.402
ZBTB40	-0.590938	3.49495	-16.2308	1.86489e-51	6.31245e-50	106.147
ACSS1	-1.02746	4.99239	-16.2222	2.07373e-51	6.9982e-50	106.041
QDPR	-1.15618	3.23332	-16.2161	2.23352e-51	7.51483e-50	105.967
YLPM1	-1.05272	3.46663	-16.2152	2.25924e-51	7.57859e-50	105.956
CD177	5.27389	7.2553	16.2127	2.33056e-51	7.79451e-50	105.925
AKAP1	-0.942546	3.14518	-16.2066	2.50919e-51	8.36694e-50	105.852
ITGB7	-1.16743	3.2966	-16.1961	2.8561e-51	9.49547e-50	105.723
DENND2D	-1.74257	7.01477	-16.1867	3.20202e-51	1.0614e-49	105.609
CHD6	-0.894333	2.38295	-16.1817	3.40805e-51	1.12637e-49	105.547
METTL2B	-0.583961	2.85878	-16.1743	3.72959e-51	1.22901e-49	105.457
FAM113B	-2.30734	4.22926	-16.1676	4.0477e-51	1.32993e-49	105.376
PEBP1	-1.98576	4.28137	-16.1653	4.16211e-51	1.36352e-49	105.348
RNF220	-0.55106	3.24911	-16.1555	4.69691e-51	1.53423e-49	105.228
MPRIP	-1.03065	4.38447	-16.1415	5.57442e-51	1.81558e-49	105.058
RRP1B	-2.22864	4.22679	-16.1376	5.84802e-51	1.89917e-49	105.01
MAK16	-0.887605	3.17524	-16.1303	6.3877e-51	2.06843e-49	104.922
PRKRA	-0.964606	3.2298	-16.1235	6.94582e-51	2.24268e-49	104.839
TRIM68	-0.906637	3.18815	-16.1176	7.46737e-51	2.40415e-49	104.767
RORA	-2.16393	3.59681	-16.1146	7.74546e-51	2.48654e-49	104.731
HEBP2	1.29217	7.49299	16.1135	7.84831e-51	2.51236e-49	104.718
NAA25	-0.668788	2.75183	-16.1061	8.58943e-51	2.74177e-49	104.628
SLC38A1	-1.81388	4.47206	-16.0714	1.31352e-50	4.18086e-49	104.206
CNIH4	1.83121	6.48262	16.0676	1.37586e-50	4.36688e-49	104.16
DIS3L	-0.966677	2.7993	-16.0617	1.4785e-50	4.6794e-49	104.088
LPIN1	-1.72656	4.3813	-16.0462	1.78636e-50	5.63784e-49	103.9
PGS1	1.67438	5.49681	16.0253	2.30296e-50	7.24787e-49	103.647
DHX30	-0.767158	3.20591	-16.025	2.3121e-50	7.25623e-49	103.643
PGRMC2	-0.833107	3.34605	-16.0242	2.33592e-50	7.31053e-49	103.633
BMS1	-0.76707	3.45762	-15.983	3.85676e-50	1.20365e-48	103.135
MTERFD2	-0.698529	2.89284	-15.9804	3.98252e-50	1.23945e-48	103.103
TAF15	-1.21519	5.26486	-15.9794	4.02971e-50	1.25066e-48	103.091
CAMK2D	-1.02562	3.03992	-15.9601	5.09549e-50	1.57707e-48	102.858
LIN7A	2.05808	5.15986	15.9573	5.2714e-50	1.62702e-48	102.824
BBS2	-0.892972	3.13894	-15.9532	5.54064e-50	1.70542e-48	102.775
NFATC3	-1.60841	5.35025	-15.9499	5.76805e-50	1.77055e-48	102.735
NUP43	-0.961375	3.97344	-15.9356	6.86944e-50	2.10288e-48	102.561
KIF21A	-1.03917	2.51152	-15.9245	7.86292e-50	2.40044e-48	102.427
TGFBR3	-2.17132	3.83322	-15.9235	7.95279e-50	2.42128e-48	102.415
TIAM1	-2.26163	3.97423	-15.916	8.71872e-50	2.64728e-48	102.324
KIAA1310	-1.06437	5.30682	-15.9064	9.78728e-50	2.96369e-48	102.209
WDR54	-1.56172	3.42649	-15.896	1.11044e-49	3.35346e-48	102.083
ZNF512	-1.06789	5.25989	-15.8791	1.3636e-49	4.10693e-48	101.879
NDUFB3	1.81097	6.20318	15.8726	1.4758e-49	4.43293e-48	101.801
MAGED1	-1.43833	3.78311	-15.8609	1.70049e-49	5.0942e-48	101.66
PGLYRP1	2.76573	6.62188	15.8436	2.09906e-49	6.27144e-48	101.45
GAR1	-1.21479	3.50329	-15.8367	2.28073e-49	6.7961e-48	101.368
USP11	-1.73994	4.34732	-15.8362	2.29484e-49	6.81999e-48	101.362
ATP8B2	-1.25854	4.13179	-15.8263	2.58881e-49	7.67328e-48	101.242
CDC25B	-0.939603	3.50465	-15.826	2.59816e-49	7.68067e-48	101.238
ILF3	-0.836577	4.12187	-15.8255	2.6124e-49	7.70244e-48	101.233
NCOA5	-1.07597	4.12178	-15.825	2.62937e-49	7.73215e-48	101.226
MTMR15	-1.13327	2.59001	-15.8244	2.64605e-49	7.76082e-48	101.22
PPIH	-1.33782	3.79264	-15.8224	2.71377e-49	7.93866e-48	101.195
METAP1	-1.51154	5.0591	-15.8075	3.25059e-49	9.48427e-48	101.015
TGS1	-0.852472	3.473	-15.8065	3.28946e-49	9.57275e-48	101.004
RBBP7	-1.54876	3.72273	-15.7997	3.57125e-49	1.03659e-47	100.922
CEP78	-1.3697	3.04433	-15.7944	3.80562e-49	1.10176e-47	100.859
MRI1	-1.32057	4.34276	-15.7838	4.32652e-49	1.24934e-47	100.731
CD74	-2.18249	6.81603	-15.7829	4.376e-49	1.26038e-47	100.72
LCMT2	-0.658981	2.88632	-15.767	5.30503e-49	1.52404e-47	100.529
ITGA4	-1.50832	3.6004	-15.7534	6.25199e-49	1.79149e-47	100.365
DBP	-0.741368	2.62862	-15.7497	6.53896e-49	1.86894e-47	100.321
GCN1L1	-1.29711	3.95952	-15.7443	6.98049e-49	1.99006e-47	100.256
WDR33	-0.628985	3.39991	-15.726	8.70424e-49	2.47519e-47	100.036
NACA	-0.869262	9.63795	-15.723	9.02609e-49	2.56021e-47	100
RNMT	-1.00559	2.98034	-15.7202	9.33917e-49	2.64232e-47	99.9663
QSOX1	1.38108	5.9881	15.7151	9.9246e-49	2.80089e-47	99.9058
MYCL1	-1.58669	3.1983	-15.7002	1.18876e-48	3.34644e-47	99.7264
HNRNPR	-1.4647	6.66659	-15.6895	1.35254e-48	3.79797e-47	99.5981
IPO5	-1.26862	3.35933	-15.6888	1.36315e-48	3.81817e-47	99.5903
AUTS2	-1.75582	2.84709	-15.6822	1.47598e-48	4.1239e-47	99.5113
NFE2	1.22419	9.4301	15.6686	1.73962e-48	4.84844e-47	99.3479
AGK	-1.06384	3.3949	-15.6631	1.85757e-48	5.16433e-47	99.2827
UBQLN4	-0.743661	2.67818	-15.6626	1.86906e-48	5.1834e-47	99.2765
ATXN7L3B	-0.654648	3.49952	-15.6556	2.03436e-48	5.6279e-47	99.1923
HABP4	-0.799851	2.66377	-15.6448	2.31789e-48	6.39646e-47	99.0626
TC2N	-1.09866	2.62442	-15.641	2.42575e-48	6.67768e-47	99.0174
FNBP4	-1.23339	4.57867	-15.6385	2.4991e-48	6.86272e-47	98.9878
GORASP2	-1.06607	4.48382	-15.636	2.57695e-48	7.05921e-47	98.9573
HSPA9	-1.39472	4.17866	-15.6299	2.77281e-48	7.5772e-47	98.8844
HLA-DOA	-1.15632	3.25999	-15.6257	2.91588e-48	7.94878e-47	98.8344
CXCR3	-0.927401	3.03684	-15.6165	3.2565e-48	8.85579e-47	98.7246
KIF1B	1.53138	4.73781	15.6125	3.41662e-48	9.26873e-47	98.6769
QRICH1	-0.858074	5.02428	-15.6092	3.55599e-48	9.62349e-47	98.6371
TLR5	2.60462	7.53488	15.6039	3.79057e-48	1.02336e-46	98.5736
LILRA6	1.96998	9.31858	15.6013	3.91187e-48	1.05357e-46	98.5423
G3BP1	-1.07315	4.01077	-15.6006	3.94489e-48	1.05992e-46	98.534
ZNF146	-1.42009	3.67835	-15.5991	4.01598e-48	1.07644e-46	98.5162
HMGN3	-1.29255	4.1221	-15.5978	4.08065e-48	1.09116e-46	98.5003
VEGFB	-1.22373	4.02675	-15.5941	4.26555e-48	1.13789e-46	98.4563
TBX21	-2.15174	4.83755	-15.5898	4.48942e-48	1.19476e-46	98.4054
WBSCR22	-0.853064	3.63866	-15.5824	4.90869e-48	1.30325e-46	98.3167
EIF3D	-0.980164	7.78582	-15.5815	4.96003e-48	1.31376e-46	98.3063
TH1L	-1.33819	5.11473	-15.554	6.90399e-48	1.82435e-46	97.9776
BTN3A3	-1.87648	3.6666	-15.5504	7.20441e-48	1.89925e-46	97.9352
RUNX3	-1.71169	4.55107	-15.5414	8.03182e-48	2.11241e-46	97.8272
NOB1	-1.55451	4.51725	-15.5265	9.60598e-48	2.5205e-46	97.6493
LARS	-1.44688	4.42535	-15.5187	1.05394e-47	2.75896e-46	97.5571
HMG20A	-1.12359	2.91075	-15.5086	1.19052e-47	3.10923e-46	97.436
BMX	2.90782	5.87733	15.5054	1.23722e-47	3.22369e-46	97.3977
C16orf58	-0.983106	3.71107	-15.4987	1.34021e-47	3.48392e-46	97.3182
GPATCH1	-1.1405	3.65193	-15.4931	1.43371e-47	3.71836e-46	97.2512
PLSCR3	-1.1378	4.28585	-15.4881	1.52058e-47	3.93454e-46	97.1927
ID3	-1.23138	3.26795	-15.4855	1.56878e-47	4.04991e-46	97.1617
VNN1	2.7311	5.86734	15.4729	1.82439e-47	4.69895e-46	97.0116
MBLAC2	-0.712132	2.4483	-15.4719	1.84725e-47	4.74693e-46	96.9993
MAP3K14	-0.820445	2.74567	-15.4652	2.00191e-47	5.13258e-46	96.9193
TXLNG	-0.956249	2.60997	-15.4591	2.15193e-47	5.50461e-46	96.8475
SUN2	-0.855552	4.5866	-15.4561	2.23106e-47	5.69402e-46	96.8116
C11orf46	-1.20849	3.89774	-15.4376	2.78498e-47	7.09156e-46	96.5912
C19orf2	-1.32649	3.33061	-15.4275	3.14117e-47	7.97524e-46	96.4715
APOL3	-1.72569	4.1954	-15.4274	3.14625e-47	7.97524e-46	96.4699
MALT1	-0.981703	3.17501	-15.4166	3.5789e-47	9.05148e-46	96.3419
SMAD7	-0.844934	2.79023	-15.4131	3.73152e-47	9.4162e-46	96.3003
CNO	-0.805639	4.78684	-15.4129	3.74054e-47	9.41776e-46	96.2979
UBIAD1	-0.781364	3.21607	-15.4122	3.77327e-47	9.47885e-46	96.2893
WDR75	-1.05021	3.00394	-15.4113	3.81276e-47	9.55662e-46	96.2789
CD59	2.01551	7.16066	15.406	4.06412e-47	1.01639e-45	96.2155
PGD	1.77075	9.06472	15.4057	4.07812e-47	1.01762e-45	96.2121
UBAP2	-1.24367	4.43189	-15.3931	4.7369e-47	1.17938e-45	96.0632
MYBL1	-2.38899	3.19537	-15.3666	6.50052e-47	1.6149e-45	95.7486
PAPD7	-1.30698	4.85287	-15.3657	6.56825e-47	1.62811e-45	95.7383
AQP3	-0.829905	2.79664	-15.356	7.37439e-47	1.8239e-45	95.6232
PPP3CC	-1.63639	3.47554	-15.3448	8.43086e-47	2.0806e-45	95.4902
ELP3	-0.715351	3.16282	-15.3347	9.50937e-47	2.3416e-45	95.3705
PWP1	-1.06132	3.88093	-15.3309	9.95185e-47	2.44519e-45	95.3253
AARS2	-0.758453	2.55377	-15.3046	1.36119e-46	3.33715e-45	95.014
BCL11A	-1.08083	3.35895	-15.3028	1.39049e-46	3.40154e-45	94.9928
NUDCD3	-0.767767	3.64098	-15.2986	1.46233e-46	3.56949e-45	94.9428
REPS1	-1.43677	4.27762	-15.2853	1.71175e-46	4.16922e-45	94.7862
LTBP3	-0.630342	2.54631	-15.2844	1.72965e-46	4.20368e-45	94.7759
SFRS15	-1.09974	5.69774	-15.2842	1.73369e-46	4.20439e-45	94.7736
PURA	-1.46652	5.04194	-15.2698	2.05836e-46	4.98096e-45	94.6029
CACNA2D3	-1.61847	3.13827	-15.2693	2.07094e-46	5.0006e-45	94.5969
RDH13	-1.10557	3.27788	-15.2394	2.95333e-46	7.11594e-45	94.2441
SEH1L	-0.875842	2.66598	-15.2388	2.97438e-46	7.15127e-45	94.2371
ELP2	-1.28741	3.56687	-15.2381	3.00133e-46	7.20061e-45	94.2281
NONO	-0.866486	6.86194	-15.2332	3.18033e-46	7.61376e-45	94.1705
CYBASC3	-0.978024	4.04063	-15.2207	3.68811e-46	8.81056e-45	94.0233
METTL13	-0.953645	3.88594	-15.202	4.60486e-46	1.09772e-44	93.8026
EEF2K	-0.90595	3.06097	-15.1997	4.73204e-46	1.12564e-44	93.7756
PPRC1	-0.950557	2.79636	-15.1857	5.58804e-46	1.32645e-44	93.6103
DCAF4	-0.696606	2.2552	-15.1836	5.72447e-46	1.35596e-44	93.5863
HLA-DMB	-1.86694	4.35808	-15.176	6.26685e-46	1.4813e-44	93.4963
RNPS1	-0.765972	6.05145	-15.1715	6.60745e-46	1.55852e-44	93.4437
ZNF789	-0.923543	2.578	-15.1703	6.70124e-46	1.57732e-44	93.4297
NFX1	-1.03467	3.84838	-15.1684	6.85752e-46	1.61073e-44	93.4068
RSAD1	-0.724676	2.9955	-15.1561	7.93182e-46	1.85917e-44	93.2622
NT5DC1	-0.843057	2.66732	-15.1545	8.08563e-46	1.89126e-44	93.2431
TRIM44	-1.13202	4.39277	-15.1539	8.13982e-46	1.89997e-44	93.2364
MCCC1	-1.06065	3.52875	-15.1459	8.94519e-46	2.08362e-44	93.1427
EIF5B	-1.13918	3.51943	-15.1436	9.19848e-46	2.13817e-44	93.1149
NHP2L1	-1.38772	5.25086	-15.1241	1.15855e-45	2.68746e-44	92.8856
LDHB	-2.13226	7.93993	-15.1111	1.35125e-45	3.12797e-44	92.7327
LANCL1	-1.27434	4.22955	-15.0962	1.61082e-45	3.72115e-44	92.5581
GPR68	-0.958988	3.46838	-15.0892	1.7503e-45	4.03506e-44	92.4755
C18orf55	-0.80785	2.98233	-15.0811	1.92515e-45	4.42902e-44	92.3809
TSEN54	-1.26382	3.71499	-15.075	2.06934e-45	4.75099e-44	92.3091
ZC3H14	-0.612284	3.23894	-15.0711	2.1656e-45	4.96184e-44	92.2639
IK	-0.714017	7.6194	-15.0535	2.6669e-45	6.09795e-44	92.057
TMC8	-0.966365	4.84404	-15.0515	2.73005e-45	6.22962e-44	92.0337
COQ10A	-0.807241	2.76253	-15.0479	2.84861e-45	6.48695e-44	91.9915
PCCA	-0.883989	2.7866	-15.0446	2.96061e-45	6.72834e-44	91.9532
POLRMT	-1.07774	3.82154	-15.0327	3.40773e-45	7.72879e-44	91.8134
SULT1B1	2.24604	5.10974	15.0271	3.64131e-45	8.22997e-44	91.7475
ZNF600	-0.788343	4.44221	-15.027	3.6434e-45	8.22997e-44	91.7469
HADH	-1.15088	3.3598	-15.0144	4.22502e-45	9.52458e-44	91.5997
TGIF2	-1.0735	3.75763	-15.0117	4.3637e-45	9.81746e-44	91.5676
LUC7L2	-1.30328	4.28887	-15.008	4.55821e-45	1.02345e-43	91.5243
NUP205	-1.28828	3.8334	-14.999	5.06508e-45	1.13498e-43	91.4195
GFM1	-0.910429	2.67711	-14.9982	5.11686e-45	1.1443e-43	91.4094
UNC119B	-1.12331	4.61269	-14.9952	5.29998e-45	1.18289e-43	91.3744
ABI2	-1.09271	3.36805	-14.9866	5.86151e-45	1.30561e-43	91.2744
HLA-DPA1	-2.35781	8.57662	-14.9845	6.01057e-45	1.33616e-43	91.2494
FCRL6	-0.965412	3.02948	-14.979	6.40879e-45	1.42186e-43	91.1857
FAM53B	-1.30723	5.25956	-14.9735	6.83973e-45	1.51447e-43	91.121
NACA2	-0.773816	7.93328	-14.9684	7.26426e-45	1.6053e-43	91.0611
IL23A	-2.09248	6.18637	-14.9673	7.35385e-45	1.6219e-43	91.0489
NRD1	0.816539	7.60886	14.9578	8.22656e-45	1.81081e-43	90.9375
BZW2	-0.982517	3.52255	-14.9571	8.29341e-45	1.82195e-43	90.9295
FIP1L1	-0.68213	4.49155	-14.9499	9.02441e-45	1.97866e-43	90.8455
C8orf33	-0.778499	3.16491	-14.9487	9.15252e-45	2.00283e-43	90.8315
GTF3C2	-0.849878	4.57747	-14.947	9.33995e-45	2.03749e-43	90.8114
SYNRG	-0.580911	3.11682	-14.9469	9.3473e-45	2.03749e-43	90.8106
DDX28	-0.543516	3.24235	-14.9379	1.0389e-44	2.26016e-43	90.7056
SNX3	1.3517	9.92315	14.9333	1.09748e-44	2.38299e-43	90.6511
CHIC1	-0.809823	2.44884	-14.9319	1.11585e-44	2.41818e-43	90.6346
NOL8	-1.04862	3.78576	-14.9258	1.19871e-44	2.59274e-43	90.5634
CCDC115	-1.22418	4.07569	-14.9087	1.46454e-44	3.16161e-43	90.3643
GGA2	-0.884343	3.26101	-14.8948	1.72316e-44	3.71275e-43	90.2027
S100P	2.01992	11.1762	14.8824	1.99311e-44	4.28614e-43	90.0581
FAM98B	-1.20232	3.63569	-14.8822	1.99895e-44	4.29048e-43	90.0552
HOXB2	-1.2173	2.76615	-14.8808	2.03146e-44	4.35191e-43	90.0392
HMGB2	1.49263	5.42285	14.8803	2.04177e-44	4.36565e-43	90.0341
OTUD3	-0.790323	2.72202	-14.8788	2.07949e-44	4.43783e-43	90.0159
UBE2F	1.42637	5.83494	14.8785	2.08677e-44	4.44491e-43	90.0125
ATM	-1.05408	3.70559	-14.8767	2.12994e-44	4.52824e-43	89.9921
NUP62	-0.947185	4.32888	-14.8736	2.20986e-44	4.68925e-43	89.9555
FAM190B	-0.821205	3.79485	-14.8684	2.34831e-44	4.97361e-43	89.8951
SF3A3	-1.33863	4.84849	-14.8657	2.42297e-44	5.12206e-43	89.864
ZNF202	-0.667593	2.36918	-14.8642	2.46705e-44	5.20543e-43	89.8461
SIK2	-1.01254	3.29505	-14.8579	2.65556e-44	5.58216e-43	89.7729
SELM	-0.99086	2.64171	-14.856	2.71583e-44	5.69816e-43	89.7506
IKZF3	-1.23781	2.67805	-14.8542	2.77251e-44	5.8062e-43	89.7301
CRTAM	-1.37741	2.59041	-14.8473	3.00676e-44	6.28502e-43	89.6495
FAM162A	-1.60968	3.79124	-14.8445	3.10768e-44	6.48387e-43	89.6167
CDKN1C	-1.97395	3.45012	-14.8442	3.11607e-44	6.48931e-43	89.614
BLOC1S1	1.57497	6.73354	14.8353	3.46144e-44	7.19517e-43	89.5096
RBM15B	-0.683834	3.92285	-14.8319	3.60048e-44	7.47033e-43	89.4704
FCER1G	1.24354	11.2481	14.8147	4.40272e-44	9.11794e-43	89.2705
CXXC5	-1.70118	4.89536	-14.7985	5.32303e-44	1.10036e-42	89.0819
RRN3	-0.719192	2.74553	-14.7973	5.39448e-44	1.11307e-42	89.0686
SNRNP200	-1.03915	5.42467	-14.793	5.67208e-44	1.1682e-42	89.0188
UBE2G2	-0.884602	4.06	-14.7862	6.14182e-44	1.26262e-42	88.9397
ELAVL1	-0.732242	3.78437	-14.7851	6.21977e-44	1.27631e-42	88.9272
TDP1	-0.889964	3.2857	-14.784	6.30463e-44	1.29135e-42	88.9137
NF2	-1.10348	3.7385	-14.7827	6.39698e-44	1.30788e-42	88.8993
C16orf7	1.47709	6.50988	14.7793	6.65384e-44	1.35792e-42	88.8601
LY96	2.48284	7.31498	14.7768	6.85597e-44	1.39662e-42	88.8304
CD27	-2.39974	5.66325	-14.7635	8.00656e-44	1.62805e-42	88.6762
MFNG	-0.934731	4.02471	-14.7545	8.88664e-44	1.80373e-42	88.5726
CTCF	-1.32046	5.16892	-14.7396	1.05788e-43	2.14331e-42	88.3994
KLRB1	-2.53345	4.13145	-14.7362	1.10053e-43	2.2257e-42	88.3601
ITK	-2.66132	4.55299	-14.7231	1.28275e-43	2.58954e-42	88.2079
DDAH2	1.91392	6.27481	14.7086	1.51867e-43	3.06028e-42	88.0401
NUP133	-0.956805	2.62141	-14.7066	1.5531e-43	3.12405e-42	88.0179
TULP4	-1.11993	2.91788	-14.6992	1.69307e-43	3.39949e-42	87.9321
RASSF1	-0.972806	4.16103	-14.6903	1.87884e-43	3.76576e-42	87.8287
TRRAP	-1.06176	3.12166	-14.689	1.90648e-43	3.81433e-42	87.8141
MYCBP2	-1.2687	7.17816	-14.6888	1.91246e-43	3.81946e-42	87.811
LLGL1	-0.805782	3.61053	-14.6815	2.08116e-43	4.14898e-42	87.727
PRPF8	-1.15959	5.58011	-14.6751	2.24185e-43	4.46141e-42	87.6531
AES	-1.38712	5.37162	-14.6736	2.28021e-43	4.5297e-42	87.6363
SLAMF1	-0.814497	2.9108	-14.6599	2.67529e-43	5.30513e-42	87.4775
TCEA3	-0.603524	2.43716	-14.6557	2.80736e-43	5.55718e-42	87.4296
GRB10	2.51374	5.65492	14.6549	2.83342e-43	5.59887e-42	87.4204
MDFIC	-1.03256	2.80633	-14.6541	2.86104e-43	5.6435e-42	87.4108
SET	-1.15369	7.57515	-14.6509	2.96839e-43	5.84396e-42	87.3742
RETN	4.0756	7.84955	14.6508	2.97309e-43	5.84396e-42	87.3726
GMFG	1.19003	9.80709	14.6492	3.0299e-43	5.94518e-42	87.3538
NSUN2	-0.926483	3.38105	-14.6477	3.0828e-43	6.03841e-42	87.3366
GOLGA8A	-1.98002	3.17212	-14.6408	3.33889e-43	6.52861e-42	87.2573
NOP56	-1.46986	6.47406	-14.6348	3.58062e-43	6.98906e-42	87.1879
TPP2	-1.02029	3.58901	-14.6195	4.27654e-43	8.33293e-42	87.0114
MSH2	-0.815347	2.48088	-14.613	4.61305e-43	8.97302e-42	86.9361
ZNF689	-0.762099	3.344	-14.6109	4.72384e-43	9.1726e-42	86.9126
CD3D	-2.4787	5.00724	-14.5874	6.20543e-43	1.20287e-41	86.6415
L3MBTL2	-0.905619	3.44567	-14.5791	6.83298e-43	1.32222e-41	86.5458
KRI1	-1.07165	4.23425	-14.5745	7.2009e-43	1.39102e-41	86.4937
LMNB1	1.57197	6.15739	14.5651	8.03278e-43	1.54904e-41	86.385
SUCLG2	-0.821061	2.88431	-14.5627	8.26203e-43	1.59051e-41	86.3571
PLBD1	1.23657	10.8255	14.5534	9.1969e-43	1.76744e-41	86.2506
OPLAH	2.22545	4.95505	14.5494	9.63415e-43	1.84831e-41	86.2044
IL10RA	-1.33252	6.29582	-14.5346	1.14268e-42	2.18849e-41	86.0349
ZNF263	-0.69022	3.12902	-14.5316	1.18331e-42	2.26242e-41	86.0001
ABHD14B	-0.925892	3.0966	-14.5311	1.19021e-42	2.27174e-41	85.9944
TSEN15	-0.867014	2.78814	-14.5196	1.35897e-42	2.58944e-41	85.8626
HLA-DPB1	-1.9437	5.69212	-14.5177	1.38964e-42	2.64338e-41	85.8405
SAMSN1	2.89943	8.5503	14.515	1.43319e-42	2.72161e-41	85.8098
MEAF6	-1.18418	5.0306	-14.5086	1.54468e-42	2.92836e-41	85.7354
PDCD4	-1.48095	5.33018	-14.5057	1.5963e-42	3.02111e-41	85.7027
FTSJ1	-1.29376	4.42168	-14.5054	1.60221e-42	3.02719e-41	85.699
KTELC1	-1.05385	3.9932	-14.504	1.6277e-42	3.07016e-41	85.6833
TSPO	1.39696	9.95145	14.5017	1.67275e-42	3.14983e-41	85.6562
CCR5	-1.26299	2.99901	-14.4943	1.82176e-42	3.42467e-41	85.5714
NUFIP1	-0.500499	2.71419	-14.4903	1.90723e-42	3.57932e-41	85.5259
SH2D1A	-1.04605	2.51472	-14.4828	2.08068e-42	3.89833e-41	85.4394
PTBP1	-0.907168	6.99731	-14.4756	2.25912e-42	4.22557e-41	85.3577
LOC339047	-1.08978	3.70308	-14.4736	2.31125e-42	4.31587e-41	85.335
LPXN	-1.65316	6.49854	-14.4652	2.54739e-42	4.7489e-41	85.2383
TCOF1	-0.688259	3.61704	-14.4645	2.56938e-42	4.78195e-41	85.2298
ZNF561	-0.887266	2.82885	-14.4487	3.08173e-42	5.72599e-41	85.0491
GIMAP5	-1.88071	6.36411	-14.4452	3.20667e-42	5.94827e-41	85.0097
ALDH1A1	-1.25783	2.99537	-14.4439	3.25806e-42	6.0336e-41	84.9939
UGCG	2.48884	7.74327	14.4407	3.37763e-42	6.24471e-41	84.9581
QRSL1	-1.08466	3.33865	-14.4363	3.55537e-42	6.56249e-41	84.9071
MDH2	-0.626007	4.9062	-14.4316	3.75317e-42	6.91621e-41	84.8533
GNPNAT1	-0.88499	2.77031	-14.4277	3.92486e-42	7.22072e-41	84.8089
PLCXD2	-1.12593	2.58846	-14.4235	4.11751e-42	7.56271e-41	84.7613
GPR97	1.74836	6.87511	14.4205	4.26659e-42	7.82371e-41	84.7259
LFNG	-0.899331	3.54151	-14.4081	4.91849e-42	9.00438e-41	84.5847
APOBEC3F	-0.837991	3.35539	-14.4066	5.0064e-42	9.15035e-41	84.5671
NCR3	-0.792549	2.59013	-14.4061	5.03252e-42	9.18312e-41	84.5619
BAZ1B	-0.758365	4.15694	-14.4028	5.22649e-42	9.52157e-41	84.5243
UFSP2	-0.847225	3.11413	-14.3938	5.79737e-42	1.05444e-40	84.4213
KLHL3	-0.803394	2.6335	-14.3923	5.89569e-42	1.07059e-40	84.4046
RUFY3	-0.739843	2.87876	-14.3878	6.21238e-42	1.12627e-40	84.3526
CKLF	1.26951	8.58645	14.3874	6.23779e-42	1.12905e-40	84.3486
C1orf174	-0.890682	4.12961	-14.3849	6.41874e-42	1.15993e-40	84.3202
TAF4	-1.34844	4.15564	-14.3805	6.75784e-42	1.21924e-40	84.269
CARD11	-0.932661	3.11611	-14.3686	7.74597e-42	1.39527e-40	84.1334
RTN1	-1.10482	2.98129	-14.3676	7.83748e-42	1.40949e-40	84.1218
DFFA	-0.63193	2.80016	-14.3674	7.85695e-42	1.41072e-40	84.1193
AAMP	-0.767875	4.24302	-14.3602	8.52825e-42	1.52881e-40	84.0379
HNRNPA3	-0.881946	4.28951	-14.3582	8.72835e-42	1.56218e-40	84.0148
THOC1	-1.21438	4.60517	-14.3544	9.11367e-42	1.62854e-40	83.9719
HLA-DQA1	-1.93669	4.51333	-14.3524	9.32475e-42	1.66361e-40	83.9492
CD244	-1.1448	3.07866	-14.3521	9.3597e-42	1.66719e-40	83.9454
LRRC47	-1.21008	5.74007	-14.3473	9.88613e-42	1.75816e-40	83.8911
SUPT16H	-1.11	5.62824	-14.3381	1.09909e-41	1.95154e-40	83.7858
PDCD7	-1.08973	2.7184	-14.3326	1.17067e-41	2.07535e-40	83.7231
COG1	-1.04919	6.15647	-14.3129	1.46799e-41	2.59831e-40	83.4983
RPL22	-1.53345	8.329	-14.3014	1.67475e-41	2.95961e-40	83.3674
KIAA1704	-1.16352	2.8924	-14.2981	1.73829e-41	3.06706e-40	83.3304
UBTF	-0.521945	3.18892	-14.2962	1.77706e-41	3.13052e-40	83.3085
XRCC6	-1.17611	7.07764	-14.2953	1.79519e-41	3.1575e-40	83.2984
EPRS	-1.29579	4.32376	-14.2952	1.7982e-41	3.15784e-40	83.2967
AKR1B1	-1.26535	5.58051	-14.2817	2.09692e-41	3.67666e-40	83.1441
TNRC6C	-1.29999	4.10303	-14.2782	2.18468e-41	3.82455e-40	83.1033
IL7R	-2.76939	6.29624	-14.2643	2.56039e-41	4.47529e-40	82.9457
POLD2	-1.21486	3.94304	-14.2639	2.57221e-41	4.48895e-40	82.9411
SF3A1	-0.962189	5.46802	-14.2602	2.68428e-41	4.67725e-40	82.8988
ALDH18A1	-1.08342	3.38808	-14.2556	2.82861e-41	4.92108e-40	82.8467
BRD1	-0.873634	4.8887	-14.2528	2.92136e-41	5.07455e-40	82.8147
SLFN5	-1.18516	3.08038	-14.2482	3.07772e-41	5.33789e-40	82.7629
AGAP4	-1.13794	3.47937	-14.2465	3.13868e-41	5.43521e-40	82.7434
SNX29	-0.72825	2.68351	-14.232	3.705e-41	6.40599e-40	82.5786
NVL	-0.551596	2.75409	-14.2302	3.78151e-41	6.52821e-40	82.5583
SMARCC1	-0.709658	4.27309	-14.2278	3.88662e-41	6.69933e-40	82.5311
PABPC1	-0.752078	10.9209	-14.2242	4.05034e-41	6.97082e-40	82.4901
TNFAIP6	2.10938	9.14544	14.21	4.76232e-41	8.18359e-40	82.3292
KIAA0355	-0.634944	2.65012	-14.1998	5.34634e-41	9.17311e-40	82.2143
FARS2	-0.824982	2.93154	-14.1996	5.36307e-41	9.18775e-40	82.2112
PUF60	-1.08261	6.43619	-14.188	6.11702e-41	1.04634e-39	82.0805
PPP1R16B	-1.88975	3.6572	-14.1784	6.82807e-41	1.16618e-39	81.9713
HAUS5	-0.595214	2.61681	-14.1742	7.16039e-41	1.22108e-39	81.9241
KIAA0907	-0.806961	4.11141	-14.1689	7.60524e-41	1.29497e-39	81.8642
CYP4V2	-0.536162	2.53222	-14.1621	8.22198e-41	1.39786e-39	81.7867
IMPDH2	-1.68125	5.3059	-14.158	8.61493e-41	1.46245e-39	81.7404
HNRNPA1	-1.36736	7.8142	-14.1532	9.09416e-41	1.54147e-39	81.6866
IMMT	-1.14211	4.69937	-14.1525	9.16989e-41	1.55196e-39	81.6784
IL18RAP	2.00855	7.13264	14.1507	9.35654e-41	1.58116e-39	81.6583
EFTUD1	-0.644881	2.33337	-14.1442	1.00759e-40	1.70015e-39	81.5848
CST7	1.88442	10.4223	14.1406	1.05009e-40	1.7692e-39	81.5437
CBLB	-1.4912	3.42693	-14.1404	1.05215e-40	1.77001e-39	81.5418
CDC23	-1.18645	4.08238	-14.1308	1.17375e-40	1.97162e-39	81.4331
FAM38A	-1.0566	3.50171	-14.1284	1.20632e-40	2.02329e-39	81.4059
NKTR	-1.29995	6.05703	-14.128	1.21255e-40	2.0307e-39	81.4008
STAT4	-2.04652	4.74986	-14.1234	1.27689e-40	2.13526e-39	81.3495
CCDC107	-0.954789	3.45262	-14.1194	1.33688e-40	2.23226e-39	81.3039
U2AF2	-0.89318	5.40858	-14.1151	1.40301e-40	2.33918e-39	81.2559
RBM26	-0.537025	2.94536	-14.1101	1.48603e-40	2.47392e-39	81.1988
FHIT	-1.61811	3.68566	-14.1091	1.50302e-40	2.49849e-39	81.1875
EIF3A	-1.17299	4.96678	-14.1089	1.50575e-40	2.49933e-39	81.1857
ZNF566	-0.854618	2.83873	-14.101	1.64722e-40	2.7301e-39	81.0965
TBP	-0.735788	2.93577	-14.0984	1.69648e-40	2.80759e-39	81.0672
FURIN	1.22782	6.66004	14.0939	1.78484e-40	2.94946e-39	81.0168
METTL3	-0.758329	3.58419	-14.079	2.11363e-40	3.48764e-39	80.8489
HACL1	-0.95027	4.77829	-14.0776	2.14979e-40	3.54209e-39	80.832
TCF20	-0.914309	3.93507	-14.0734	2.25421e-40	3.70869e-39	80.7849
RPUSD4	-0.873502	3.44052	-14.0723	2.28287e-40	3.75033e-39	80.7723
RHOF	-0.925903	3.87501	-14.0684	2.38466e-40	3.91182e-39	80.729
TIGD3	-1.61139	3.19858	-14.0674	2.41267e-40	3.95198e-39	80.7174
SEC31A	-1.096	6.44546	-14.0662	2.44556e-40	4e-39	80.704
C2orf42	-1.03806	4.07322	-14.0576	2.69465e-40	4.40101e-39	80.6076
FGD4	1.13522	4.80835	14.0554	2.76544e-40	4.51004e-39	80.5819
RPS28	-0.757849	8.00767	-14.0424	3.20457e-40	5.21103e-39	80.4355
TRIM4	-0.787507	3.85414	-14.0313	3.63283e-40	5.89887e-39	80.3109
IARS	-1.80082	5.4699	-14.0269	3.81849e-40	6.19137e-39	80.2614
COX7B	2.5404	6.09441	14.023	3.98829e-40	6.45733e-39	80.2182
CRY1	-1.14385	2.61391	-14.021	4.08039e-40	6.59693e-39	80.1955
RRS1	-1.32093	3.94439	-14.0198	4.13565e-40	6.67663e-39	80.1821
EIF3F	-1.13495	8.90049	-14.0182	4.21157e-40	6.78942e-39	80.164
ASTE1	-1.21388	4.09056	-14.0168	4.27907e-40	6.88831e-39	80.1483
THEMIS	-2.12208	3.42846	-14.0137	4.433e-40	7.12588e-39	80.1131
KIAA1430	-1.06794	3.99492	-13.9958	5.43055e-40	8.7169e-39	79.9115
C11orf61	-0.797753	3.0138	-13.9708	7.20518e-40	1.15489e-38	79.6307
ADARB1	-0.663686	2.89624	-13.9674	7.48275e-40	1.19767e-38	79.5932
M6PR	-1.09828	6.49113	-13.9664	7.57178e-40	1.21019e-38	79.5814
RNF144A	-1.15669	3.16654	-13.9636	7.81344e-40	1.24703e-38	79.5502
R3HDM1	-0.924344	3.56673	-13.9624	7.9216e-40	1.2625e-38	79.5365
ALPL	2.35831	6.67294	13.9544	8.66805e-40	1.3795e-38	79.4471
IL1R1	2.01929	6.94025	13.9414	1.00393e-39	1.59547e-38	79.3012
ZNF548	-0.682598	2.48349	-13.9347	1.08265e-39	1.71814e-38	79.2263
KLF2	-0.975733	9.59178	-13.9297	1.14464e-39	1.81393e-38	79.171
TTC37	-1.00493	4.20715	-13.9266	1.18551e-39	1.87606e-38	79.1361
C14orf2	1.00736	4.74075	13.9121	1.39727e-39	2.20804e-38	78.9729
OFD1	-0.893139	4.01177	-13.9086	1.45348e-39	2.29364e-38	78.9337
ABCF1	-1.21493	4.41436	-13.9032	1.5431e-39	2.43163e-38	78.8743
TTYH2	-1.16979	3.62356	-13.9006	1.58915e-39	2.50068e-38	78.8451
SH3GLB1	1.30106	8.36652	13.9	1.60145e-39	2.5165e-38	78.8374
DNAJA3	-0.69761	2.53766	-13.8961	1.67226e-39	2.62409e-38	78.7944
C3orf31	-0.744381	2.70576	-13.8943	1.70666e-39	2.67433e-38	78.7742
ACTR5	-0.858934	3.18749	-13.893	1.7319e-39	2.71009e-38	78.7596
GPR160	2.17405	7.43563	13.8877	1.83818e-39	2.87238e-38	78.7005
ZNF703	-0.792572	2.87712	-13.8874	1.84448e-39	2.87821e-38	78.6971
C3orf37	-0.967189	4.00009	-13.884	1.91707e-39	2.98732e-38	78.6587
POLR1C	-0.696596	2.72642	-13.8838	1.92184e-39	2.9906e-38	78.6563
MAD1L1	-1.59155	4.09916	-13.8762	2.09247e-39	3.25142e-38	78.5718
PHC1	-0.652939	2.84578	-13.8761	2.09525e-39	3.25142e-38	78.5705
APBA2	-0.832093	3.039	-13.8713	2.21071e-39	3.42584e-38	78.5172
LRRC33	-1.28732	4.01462	-13.8594	2.52857e-39	3.913e-38	78.3838
MPHOSPH8	-0.840259	5.68803	-13.8577	2.57659e-39	3.9818e-38	78.3651
MTX3	-1.25813	3.04053	-13.8543	2.67753e-39	4.1321e-38	78.3269
ARHGAP17	-0.93863	3.3452	-13.8491	2.83682e-39	4.3719e-38	78.2695
ZNF395	-1.55377	4.01074	-13.8458	2.94501e-39	4.5324e-38	78.2324
RBBP4	-1.1013	5.16955	-13.8346	3.33898e-39	5.13167e-38	78.1077
CD3G	-2.42788	4.7338	-13.8316	3.45404e-39	5.30125e-38	78.074
UTP23	-0.712138	3.26458	-13.8282	3.5884e-39	5.49992e-38	78.0361
RFC1	-0.678283	3.53733	-13.8259	3.68171e-39	5.63523e-38	78.0106
KLHDC5	-0.805434	3.1838	-13.8248	3.72867e-39	5.69932e-38	77.998
ITGAM	1.3319	8.19506	13.8215	3.8706e-39	5.9082e-38	77.9609
RBMX	-0.825094	5.50807	-13.8204	3.91616e-39	5.96961e-38	77.9493
NOP2	-0.665912	2.83637	-13.8184	4.00725e-39	6.10016e-38	77.9265
ZZZ3	-0.670079	2.77779	-13.8182	4.01558e-39	6.10455e-38	77.9244
RNMTL1	-0.720413	2.96668	-13.8139	4.21551e-39	6.39496e-38	77.8762
ADM	1.574	7.64686	13.8138	4.21803e-39	6.39496e-38	77.8756
BAT2L1	-0.59876	3.45368	-13.8107	4.36685e-39	6.61164e-38	77.8411
ACYP1	-0.883599	2.6095	-13.8101	4.39661e-39	6.64773e-38	77.8344
SUN1	-1.7164	4.25701	-13.8053	4.64231e-39	7.00977e-38	77.7804
SLC4A7	-1.12367	2.82534	-13.7994	4.95742e-39	7.4755e-38	77.7151
AHCYL2	-0.808621	3.66388	-13.79	5.51224e-39	8.30095e-38	77.6098
NUP188	-0.792434	3.54512	-13.7883	5.61238e-39	8.44041e-38	77.5919
PSMA6	1.70841	7.87177	13.7864	5.73872e-39	8.61886e-38	77.5698
RNASEH2B	-1.2487	4.15103	-13.7794	6.20627e-39	9.30857e-38	77.492
TSFM	-1.00825	3.9524	-13.7775	6.33601e-39	9.49047e-38	77.4715
C16orf88	-0.87832	3.26831	-13.7761	6.43859e-39	9.63124e-38	77.4555
PTGDS	-1.95201	3.14222	-13.7705	6.85717e-39	1.02437e-37	77.393
HVCN1	-2.11892	5.84947	-13.7689	6.97954e-39	1.04126e-37	77.3754
LONP1	-0.894716	2.93069	-13.7686	7.00043e-39	1.04299e-37	77.3724
TRBC1	-2.85716	7.18895	-13.7534	8.29765e-39	1.23462e-37	77.2036
MED1	-0.857381	3.46215	-13.749	8.7167e-39	1.29525e-37	77.1547
MPI	-0.631239	3.02834	-13.7467	8.94473e-39	1.32737e-37	77.129
TRAP1	-1.04408	3.63787	-13.7466	8.95857e-39	1.32755e-37	77.1275
DDX20	-1.02487	3.1962	-13.7465	8.96962e-39	1.32755e-37	77.1263
CLIC1	0.692187	10.7896	13.7462	8.99452e-39	1.32948e-37	77.1235
C21orf33	-0.863084	4.46473	-13.7399	9.65465e-39	1.42517e-37	77.0532
ITPKB	-0.84589	4.32868	-13.7395	9.69619e-39	1.42942e-37	77.0489
AGPAT2	0.816788	4.78184	13.7233	1.1627e-38	1.71181e-37	76.8686
CD4	-0.849938	2.9156	-13.7198	1.20912e-38	1.77782e-37	76.8297
MEN1	-0.798424	2.9274	-13.7181	1.23227e-38	1.80948e-37	76.8109
CCDC50	-0.741691	2.73058	-13.7121	1.31678e-38	1.93104e-37	76.745
PUS1	-0.756621	3.2246	-13.7118	1.32193e-38	1.93599e-37	76.7411
CHTF8	-0.861662	6.0926	-13.7117	1.32361e-38	1.93599e-37	76.7399
GPR84	4.12115	6.62442	13.7095	1.35608e-38	1.98091e-37	76.7158
GEMIN5	-0.671214	2.51808	-13.7074	1.38874e-38	2.02597e-37	76.6922
HKR1	-1.09207	4.1881	-13.7063	1.40616e-38	2.04872e-37	76.6798
SOCS3	1.79082	4.61663	13.7019	1.47704e-38	2.14919e-37	76.6309
PPM1K	-1.36616	2.6991	-13.6999	1.5094e-38	2.19342e-37	76.6094
HNRNPU	-0.73741	6.69045	-13.694	1.6117e-38	2.33905e-37	76.5443
AIMP2	-0.842593	3.60441	-13.6902	1.68239e-38	2.43849e-37	76.5017
ZMYND11	-1.69141	4.88393	-13.6555	2.47845e-38	3.58767e-37	76.1169
USP24	-0.871255	4.28356	-13.6498	2.63844e-38	3.81433e-37	76.0548
MRPS9	-0.979358	3.8424	-13.639	2.97837e-38	4.29469e-37	75.9345
CXCR5	-1.40393	3.07659	-13.637	3.04278e-38	4.38191e-37	75.9132
CLK2	-0.966017	5.35922	-13.6353	3.10304e-38	4.46295e-37	75.8938
UTP6	-0.847951	4.28932	-13.6314	3.23848e-38	4.65179e-37	75.8513
ZFP161	-0.589546	3.09818	-13.6242	3.51119e-38	5.03704e-37	75.771
PCID2	-0.863845	3.56317	-13.6191	3.71599e-38	5.32403e-37	75.7147
MRPS26	-1.09377	3.34933	-13.6115	4.04471e-38	5.7876e-37	75.6306
CARD6	1.28166	5.13669	13.6094	4.13907e-38	5.91506e-37	75.6077
TSR1	-0.598584	3.01487	-13.6085	4.18205e-38	5.96887e-37	75.5974
MCM3	-0.51309	3.85592	-13.5968	4.76054e-38	6.78588e-37	75.4688
SIT1	-1.47431	5.47962	-13.595	4.85567e-38	6.9127e-37	75.4491
PCYOX1	-0.743375	2.84057	-13.5865	5.33805e-38	7.58978e-37	75.3551
MRPL19	-0.683295	3.26219	-13.5725	6.23389e-38	8.85229e-37	75.201
TOMM70A	-1.18763	5.32423	-13.568	6.55872e-38	9.30176e-37	75.1506
NDUFA4	1.57346	6.89831	13.5642	6.83482e-38	9.68108e-37	75.1096
PEA15	-1.01939	3.91867	-13.5613	7.05833e-38	9.98505e-37	75.0777
PBXIP1	-0.770067	3.46117	-13.561	7.08366e-38	1.00082e-36	75.0741
EIF3L	-1.38095	7.51712	-13.5575	7.36629e-38	1.03945e-36	75.0353
NUDT9	-1.22942	3.41319	-13.5539	7.66893e-38	1.08079e-36	74.9953
SMARCE1	-1.33335	4.80453	-13.5533	7.71766e-38	1.08629e-36	74.989
DYNC1H1	-1.04693	3.97094	-13.5529	7.74946e-38	1.0894e-36	74.9849
NCAPD3	-0.912569	2.66906	-13.5518	7.84776e-38	1.10183e-36	74.9724
UPF3A	-0.62073	3.13243	-13.5478	8.20375e-38	1.15037e-36	74.9283
IL32	-2.12436	4.5625	-13.5471	8.26468e-38	1.15747e-36	74.921
PFKFB3	1.4216	5.17571	13.5421	8.73827e-38	1.22227e-36	74.8657
ACSL1	1.34792	10.3582	13.5305	9.93667e-38	1.38816e-36	74.7381
DCAF7	-0.703994	4.46865	-13.5289	1.01095e-37	1.41055e-36	74.7209
NQO2	1.86361	8.83357	13.5282	1.0189e-37	1.41987e-36	74.7132
NT5E	-0.748535	2.21826	-13.528	1.02133e-37	1.42149e-36	74.7108
OCIAD2	-1.34917	3.04718	-13.5166	1.15958e-37	1.6119e-36	74.5847
PHF10	-0.793694	3.5869	-13.5132	1.20402e-37	1.6716e-36	74.5474
RPLP2	-0.837048	11.0307	-13.513	1.20628e-37	1.67267e-36	74.5455
CD81	-1.74347	5.40675	-13.5112	1.23031e-37	1.70388e-36	74.5259
ARIH2	-0.594417	5.01738	-13.5074	1.28305e-37	1.77472e-36	74.4843
FOXP1	-0.925728	5.3374	-13.4989	1.40917e-37	1.94678e-36	74.3912
HLA-DRB1	-2.26196	8.31483	-13.4964	1.4493e-37	1.99974e-36	74.3633
PRSS33	-1.0191	2.36128	-13.4959	1.45779e-37	2.00899e-36	74.3575
ZBTB5	-0.881016	3.16984	-13.4939	1.48997e-37	2.05082e-36	74.3358
EIF2B1	-0.953004	4.14574	-13.4917	1.52699e-37	2.09918e-36	74.3114
GPATCH8	-0.967497	4.34436	-13.487	1.60884e-37	2.20901e-36	74.2596
MGC27345	-0.633336	2.78565	-13.4868	1.61179e-37	2.21034e-36	74.2578
KDM1A	-1.00893	4.12279	-13.4867	1.61389e-37	2.21051e-36	74.2565
KLRF1	-1.53703	3.01093	-13.4778	1.78087e-37	2.43624e-36	74.1587
CCDC88C	-1.069	3.74593	-13.4747	1.84288e-37	2.518e-36	74.1247
CD63	1.13648	9.90962	13.4736	1.86491e-37	2.545e-36	74.1129
TYW1	-0.729849	2.41576	-13.4628	2.10184e-37	2.86485e-36	73.9942
IL27RA	-1.20275	3.9337	-13.4587	2.19809e-37	2.9924e-36	73.9497
FASTKD2	-0.93497	3.16511	-13.4566	2.25106e-37	3.06079e-36	73.9261
ESYT2	-1.30439	4.45725	-13.4465	2.51559e-37	3.41633e-36	73.8158
TRERF1	-1.07049	3.3267	-13.4416	2.65652e-37	3.60335e-36	73.7616
CYB5B	-1.10871	4.88767	-13.4401	2.69984e-37	3.65767e-36	73.7456
ALDH9A1	-1.01757	4.89259	-13.4398	2.7089e-37	3.66552e-36	73.7423
ZNF664	-1.43447	4.02868	-13.4395	2.71824e-37	3.67373e-36	73.7388
FASLG	-0.698823	2.35709	-13.4387	2.74172e-37	3.70099e-36	73.7303
NARG2	-0.879243	2.88519	-13.4264	3.14158e-37	4.23565e-36	73.5951
TMEM138	-1.03859	3.20417	-13.4247	3.20109e-37	4.3107e-36	73.5765
NARF	0.678224	5.28133	13.4195	3.38766e-37	4.55646e-36	73.5202
RAB31	1.0926	9.31783	13.4158	3.53029e-37	4.74262e-36	73.4793
GPN1	-0.738462	4.16277	-13.4136	3.61396e-37	4.84919e-36	73.456
ZNF275	-1.61636	4.32699	-13.4112	3.71134e-37	4.9739e-36	73.4296
MPHOSPH10	-1.40172	4.53397	-13.4054	3.95584e-37	5.29524e-36	73.3663
F5	1.53116	5.61814	13.4035	4.04118e-37	5.40304e-36	73.3451
ZNF317	-1.02486	4.30468	-13.4013	4.14053e-37	5.52926e-36	73.321
HMOX2	-0.699246	4.46369	-13.3961	4.38613e-37	5.85026e-36	73.2638
ATP5G2	-1.0732	8.32474	-13.3959	4.396e-37	5.85646e-36	73.2615
SLC26A8	1.5545	4.00197	13.3943	4.47188e-37	5.95047e-36	73.2446
GLRX	1.68266	7.34486	13.3904	4.66737e-37	6.20323e-36	73.2021
ATR	-0.72734	2.55595	-13.3899	4.69554e-37	6.23328e-36	73.1961
HP1BP3	-0.681276	5.05856	-13.3886	4.75984e-37	6.31115e-36	73.1826
ORC5L	-0.87186	3.74855	-13.386	4.9002e-37	6.4846e-36	73.1537
RPL14	-1.20859	8.93691	-13.386	4.90222e-37	6.4846e-36	73.1533
AFF3	-1.30729	2.40792	-13.3841	5.00403e-37	6.61145e-36	73.1329
VPS11	-0.827585	3.54858	-13.378	5.35085e-37	7.06135e-36	73.0664
NR2C1	-0.789316	2.73467	-13.3751	5.5246e-37	7.28207e-36	73.0347
PTPLAD1	-1.21402	3.58559	-13.3721	5.70956e-37	7.51703e-36	73.002
EIF4B	-0.991014	4.83168	-13.3707	5.7978e-37	7.62425e-36	72.9867
AGPAT5	-1.02539	3.02424	-13.3698	5.85613e-37	7.69192e-36	72.9768
MRPS2	-0.917667	3.08176	-13.3671	6.03356e-37	7.91569e-36	72.9472
ZCCHC4	-0.593658	2.3774	-13.3663	6.08407e-37	7.97262e-36	72.9389
GNPTAB	-0.798103	3.51789	-13.3607	6.47155e-37	8.47047e-36	72.8776
ZFP62	-1.05376	2.62392	-13.3585	6.63339e-37	8.67217e-36	72.8531
ST3GAL5	-1.19849	4.85564	-13.3557	6.83845e-37	8.92984e-36	72.8228
TMX2	-0.949471	4.4281	-13.3525	7.07953e-37	9.23389e-36	72.7884
CWF19L2	-0.798321	3.69579	-13.3486	7.39404e-37	9.63289e-36	72.7453
RPS4X	-1.23274	9.81294	-13.3481	7.43774e-37	9.67856e-36	72.7394
C16orf57	0.534287	4.69707	13.3471	7.51739e-37	9.77086e-36	72.7289
KLRK1	-2.21701	4.01299	-13.3424	7.91848e-37	1.02803e-35	72.6773
ADA	-1.64299	4.4033	-13.3407	8.06101e-37	1.04532e-35	72.6595
ECHDC2	-0.587322	3.29701	-13.3366	8.43089e-37	1.09202e-35	72.615
ISOC1	-1.45111	3.48783	-13.3362	8.47097e-37	1.09594e-35	72.6103
RPS6KA5	-1.54362	4.02132	-13.3358	8.50998e-37	1.09972e-35	72.6057
ANKRD36	-1.14125	3.9446	-13.3311	8.95785e-37	1.15626e-35	72.5548
C7orf54	-0.817588	3.11767	-13.3307	8.99566e-37	1.15981e-35	72.5506
SRP68	-0.897358	5.58359	-13.3296	9.10642e-37	1.17274e-35	72.5385
ZNF671	-0.918909	4.16218	-13.3268	9.389e-37	1.20774e-35	72.5081
LAX1	-1.30415	3.06084	-13.3233	9.7611e-37	1.25417e-35	72.4696
ZNF766	-0.666013	3.26181	-13.3227	9.82375e-37	1.26077e-35	72.4632
TNFAIP8L1	-0.534059	2.81185	-13.3212	9.99296e-37	1.28102e-35	72.4462
SLAMF6	-1.49056	4.84987	-13.3075	1.16092e-36	1.48651e-35	72.2974
XYLT1	-1.30208	3.14425	-13.3043	1.2017e-36	1.53697e-35	72.2631
EEF2	-1.0439	8.58207	-13.2927	1.36566e-36	1.7427e-35	72.1362
MAF	-1.52074	3.34008	-13.2858	1.47301e-36	1.87755e-35	72.061
RPRD2	-0.558435	2.57348	-13.2848	1.48829e-36	1.89486e-35	72.0508
XPO4	-0.644196	3.04005	-13.2761	1.63729e-36	2.08221e-35	71.9561
SUPV3L1	-0.883947	2.9546	-13.2737	1.68197e-36	2.13659e-35	71.9293
LPAR5	-0.866739	2.78309	-13.2717	1.71795e-36	2.17983e-35	71.9083
TNRC6A	-0.995779	4.56117	-13.2674	1.80083e-36	2.28241e-35	71.8615
MTX1	0.992322	6.35718	13.2654	1.84053e-36	2.33009e-35	71.8399
CDK4	-0.91855	3.70754	-13.2647	1.856e-36	2.34703e-35	71.8316
GCLM	1.35576	5.11455	13.2633	1.88426e-36	2.38008e-35	71.8166
TMEM41A	-0.623773	2.9147	-13.258	1.99685e-36	2.51945e-35	71.759
FAM168B	-0.862268	5.72967	-13.2485	2.21414e-36	2.79047e-35	71.6564
CUL1	-1.23594	4.36776	-13.2367	2.52108e-36	3.17373e-35	71.5275
RPL28	-0.7396	9.99413	-13.236	2.5396e-36	3.19346e-35	71.5203
MRPL49	-0.812292	5.38894	-13.2341	2.59293e-36	3.25686e-35	71.4996
ANKRD40	-0.83459	4.18042	-13.2322	2.64774e-36	3.32198e-35	71.4789
KLRD1	-1.67685	3.6095	-13.2176	3.10442e-36	3.8906e-35	71.3209
TMEM203	-1.0319	4.67163	-13.2134	3.24943e-36	4.06778e-35	71.2756
USP28	-0.691689	2.51935	-13.2101	3.37102e-36	4.21528e-35	71.2391
ENOX2	-0.634178	2.79425	-13.2089	3.41449e-36	4.26488e-35	71.2264
SDR39U1	-0.993896	5.18007	-13.2074	3.47024e-36	4.32968e-35	71.2103
PTPN4	-1.67339	6.01024	-13.2021	3.67776e-36	4.58349e-35	71.1527
PCYOX1L	-1.40034	4.3217	-13.2019	3.68508e-36	4.58752e-35	71.1507
UBAP1	0.925502	5.84288	13.1953	3.95927e-36	4.92338e-35	71.0794
YEATS2	-1.06373	3.03293	-13.1874	4.31754e-36	5.36294e-35	70.9935
TSEN2	-0.658544	2.67914	-13.1857	4.39777e-36	5.45654e-35	70.9752
SMARCA4	-0.980941	4.5448	-13.1793	4.7168e-36	5.8459e-35	70.9057
SETD8	0.50932	3.56867	13.1786	4.75115e-36	5.88198e-35	70.8985
UBL5	1.04205	8.68403	13.1735	5.02304e-36	6.21172e-35	70.8432
PPP1R8	-0.94055	4.79887	-13.1615	5.72389e-36	7.07062e-35	70.7135
HNRPDL	-1.21998	4.79919	-13.1609	5.75897e-36	7.10611e-35	70.7075
HTATSF1	-1.45344	4.06323	-13.1592	5.87169e-36	7.23723e-35	70.6882
HARS	-0.678827	3.25722	-13.1561	6.07311e-36	7.47726e-35	70.6548
OSCAR	1.22385	6.43842	13.1535	6.24639e-36	7.68217e-35	70.6268
FUS	-1.08762	8.63761	-13.1518	6.36014e-36	7.81348e-35	70.6089
PRKX	-0.8415	3.17694	-13.1507	6.44077e-36	7.90387e-35	70.5964
ZFP36L2	-1.60668	6.34887	-13.1495	6.51937e-36	7.99158e-35	70.5844
RAD1	-0.583611	2.91786	-13.1452	6.83806e-36	8.37308e-35	70.537
JAK1	-1.03777	7.5996	-13.1358	7.57527e-36	9.25554e-35	70.4354
PREP	-0.962879	4.74684	-13.1314	7.93941e-36	9.68988e-35	70.3888
LTB4R	1.4356	6.78103	13.1269	8.34048e-36	1.01683e-34	70.3398
PPAP2A	-0.55129	2.53536	-13.1229	8.71008e-36	1.06054e-34	70.2968
TIMM9	-0.8313	3.11999	-13.1228	8.71796e-36	1.06054e-34	70.2959
SPON2	-1.86159	4.15382	-13.1127	9.73625e-36	1.18313e-34	70.1862
DHX35	-0.563877	2.82412	-13.1065	1.04133e-35	1.26404e-34	70.1195
CBFA2T2	-0.783105	3.01675	-13.0963	1.16284e-35	1.41e-34	70.01
CCT6A	-1.30018	3.50759	-13.0927	1.20977e-35	1.46533e-34	69.9707
CIRH1A	-1.38858	3.73579	-13.0907	1.2363e-35	1.49585e-34	69.9491
DDX27	-1.21206	4.99315	-13.0905	1.2386e-35	1.49701e-34	69.9473
PDCD11	-0.536216	3.19425	-13.0834	1.33748e-35	1.61478e-34	69.8711
BLNK	-1.74497	3.4664	-13.0826	1.34963e-35	1.6277e-34	69.8621
DDHD1	-0.650608	2.41394	-13.0817	1.36308e-35	1.64215e-34	69.8522
TRIM28	-1.02252	3.57814	-13.0731	1.49646e-35	1.80089e-34	69.7596
TMEM19	-0.997582	3.00409	-13.0699	1.54881e-35	1.86189e-34	69.7254
STRBP	-1.02484	3.11481	-13.0517	1.88593e-35	2.26473e-34	69.53
HNRNPA1L2	-0.559755	2.78102	-13.0482	1.95819e-35	2.34899e-34	69.4926
TMEM42	-1.06484	3.70134	-13.0439	2.05235e-35	2.4593e-34	69.446
TOP2B	-0.943042	6.44272	-13.0411	2.11639e-35	2.53334e-34	69.4155
ZNF264	-0.914365	3.26436	-13.0401	2.13787e-35	2.55632e-34	69.4055
GON4L	-0.707398	3.46517	-13.0395	2.1523e-35	2.57082e-34	69.3988
ANK3	-0.858992	2.78894	-13.0273	2.45734e-35	2.93206e-34	69.2673
NOC2L	-0.629796	2.57002	-13.0177	2.7257e-35	3.2488e-34	69.1644
TMEM229B	-0.944096	3.15952	-13.0077	3.03511e-35	3.61375e-34	69.0577
ZNF438	1.58278	5.36756	13.0069	3.0641e-35	3.64439e-34	69.0482
ZBTB24	-0.914715	3.3599	-13.0057	3.1029e-35	3.68663e-34	69.0357
C21orf59	-1.32349	4.94474	-12.9993	3.32386e-35	3.94497e-34	68.9675
HSPA8	-1.58169	7.16065	-12.997	3.40873e-35	4.04141e-34	68.9424
MTOR	-0.500599	2.97704	-12.9952	3.47738e-35	4.11845e-34	68.9226
LEPROTL1	-1.32173	5.42145	-12.9947	3.4933e-35	4.13294e-34	68.9181
RANGRF	-1.32852	5.68194	-12.9946	3.49928e-35	4.13565e-34	68.9164
P2RY8	-1.32114	5.34836	-12.9898	3.68413e-35	4.34953e-34	68.8653
SMCR7L	-0.576317	2.8663	-12.9782	4.1754e-35	4.92433e-34	68.7411
MXD3	1.05984	4.74456	12.9762	4.26747e-35	5.02763e-34	68.7194
GIMAP6	-1.81144	5.81847	-12.9606	5.04718e-35	5.93998e-34	68.5529
FYN	-1.6853	5.97209	-12.9553	5.34904e-35	6.28864e-34	68.4952
RSL1D1	-0.990122	4.12478	-12.9547	5.38112e-35	6.31971e-34	68.4893
ATP11B	1.71159	5.36137	12.9298	7.03935e-35	8.24988e-34	68.2227
PPIE	-1.05671	4.17097	-12.9293	7.07509e-35	8.2831e-34	68.2176
SLC41A1	-0.634543	2.53599	-12.9216	7.68584e-35	8.98874e-34	68.1355
TEX10	-0.913509	2.97947	-12.9134	8.39848e-35	9.81195e-34	68.0475
ICAM2	-1.26227	5.27545	-12.9035	9.33928e-35	1.08997e-33	67.9421
ARID1B	-0.909968	3.68435	-12.8993	9.77225e-35	1.13932e-33	67.8971
KIAA1967	-0.917917	5.04741	-12.8922	1.05449e-34	1.22812e-33	67.8216
RPL18	-1.16276	9.80964	-12.89	1.07938e-34	1.2558e-33	67.7984
ERCC5	-0.798638	3.69169	-12.8821	1.17532e-34	1.36601e-33	67.7139
CCDC84	-0.960374	4.51673	-12.8795	1.20859e-34	1.40322e-33	67.6862
CHST14	-0.77907	3.85401	-12.8761	1.25369e-34	1.45407e-33	67.6499
ALG8	-0.979557	3.36452	-12.8748	1.27126e-34	1.47292e-33	67.636
SYNCRIP	-0.751918	3.63624	-12.8708	1.32715e-34	1.53609e-33	67.5933
ZBTB2	-0.580311	2.66907	-12.8606	1.48045e-34	1.71176e-33	67.4849
ARL2BP	-1.02829	5.93778	-12.8468	1.71625e-34	1.98235e-33	67.3382
KIAA1539	1.13107	6.59512	12.8446	1.75832e-34	2.02885e-33	67.3141
PDXDC1	-0.535698	3.36885	-12.8396	1.85399e-34	2.13704e-33	67.2616
POLR1E	-0.672952	2.45598	-12.8336	1.97697e-34	2.27647e-33	67.1978
BAHD1	-0.633822	3.79872	-12.8314	2.02393e-34	2.32814e-33	67.1745
TERF2	-0.681552	3.80763	-12.8283	2.09218e-34	2.40418e-33	67.1416
TRBV9	-1.52789	4.07337	-12.826	2.1452e-34	2.46258e-33	67.1168
C22orf29	-0.557337	2.93223	-12.8231	2.21289e-34	2.53769e-33	67.0859
GPATCH4	-0.683069	2.77593	-12.8209	2.26454e-34	2.59426e-33	67.063
RABGEF1	1.72224	6.38396	12.8109	2.52292e-34	2.88731e-33	66.9558
SGK1	-2.02693	4.3623	-12.809	2.57451e-34	2.94334e-33	66.9357
EIF2B5	-0.722159	4.74395	-12.8017	2.7829e-34	3.17835e-33	66.8585
STOM	2.2469	7.55262	12.7989	2.8682e-34	3.27244e-33	66.8285
RCC2	-1.17024	6.34987	-12.7949	2.99377e-34	3.41223e-33	66.786
ZNF91	-1.47955	5.7204	-12.7935	3.0361e-34	3.45696e-33	66.7721
NAAA	-1.13318	4.36509	-12.7871	3.25442e-34	3.70178e-33	66.7032
MLLT6	-0.895193	4.38496	-12.7791	3.54366e-34	4.02669e-33	66.6187
CTSO	-1.70953	4.60036	-12.7747	3.71531e-34	4.21746e-33	66.5717
HNRNPM	-0.796357	7.67322	-12.772	3.82143e-34	4.33353e-33	66.5438
ANKRD22	2.74365	5.99835	12.7719	3.82824e-34	4.33687e-33	66.542
TRMT61B	-0.651197	2.80533	-12.7586	4.41217e-34	4.99333e-33	66.4011
HSD17B8	-0.919895	3.19136	-12.7537	4.64883e-34	5.25586e-33	66.3493
HNRNPH1	-1.43484	5.46245	-12.7514	4.76116e-34	5.37743e-33	66.3256
MAP2K6	1.5838	4.95192	12.7502	4.82576e-34	5.44489e-33	66.3122
RPA1	-0.673464	4.88599	-12.7379	5.49855e-34	6.19776e-33	66.1827
UTRN	-1.38811	5.46924	-12.728	6.11566e-34	6.88642e-33	66.0771
YARS2	-0.794761	2.84931	-12.7252	6.30069e-34	7.08764e-33	66.0476
PRF1	-2.25185	5.54441	-12.7191	6.72388e-34	7.55611e-33	65.9831
LYAR	-1.25382	4.827	-12.7188	6.7406e-34	7.56731e-33	65.9806
DDX56	-0.916645	4.74547	-12.7149	7.02925e-34	7.88345e-33	65.939
PADI4	1.49547	9.06393	12.7117	7.27287e-34	8.14852e-33	65.9052
GLTSCR2	-1.52571	8.81197	-12.7098	7.41915e-34	8.30411e-33	65.8854
NUCKS1	-1.0266	5.18866	-12.7057	7.75371e-34	8.66978e-33	65.8416
BRPF1	-0.711833	3.48708	-12.7056	7.76133e-34	8.66978e-33	65.8407
C10orf18	-0.881954	2.81784	-12.7011	8.14114e-34	9.08499e-33	65.7933
WDR46	-0.606172	3.33528	-12.7008	8.17031e-34	9.10848e-33	65.7897
NSUN5P2	-1.4954	3.87592	-12.699	8.32289e-34	9.26935e-33	65.7713
BET1L	-0.963676	6.44633	-12.6929	8.87881e-34	9.87867e-33	65.7072
HLA-DMA	-2.15791	5.95593	-12.6902	9.14327e-34	1.01628e-32	65.6781
CD2	-2.43548	5.64743	-12.6822	9.95409e-34	1.10531e-32	65.5937
CLEC2D	-0.778985	3.04161	-12.6817	1.00075e-33	1.11014e-32	65.5884
UMPS	-1.09172	3.76843	-12.6761	1.06158e-33	1.17645e-32	65.5299
CDC16	-0.862955	4.37421	-12.6707	1.12491e-33	1.2454e-32	65.4724
CNOT7	-0.904192	6.24483	-12.6697	1.13666e-33	1.25717e-32	65.4621
POLR3B	-0.560502	2.59685	-12.6695	1.13958e-33	1.25916e-32	65.4595
USP13	-0.677751	2.66537	-12.6481	1.42934e-33	1.57777e-32	65.2347
RBM4B	-0.693928	2.45011	-12.6324	1.68859e-33	1.8621e-32	65.0693
KLHDC4	-0.84784	3.26231	-12.6278	1.77421e-33	1.9546e-32	65.0203
CCDC109B	-1.10999	4.53703	-12.6267	1.79503e-33	1.97559e-32	65.0087
ZNF227	-0.769087	2.80253	-12.6241	1.8436e-33	2.02705e-32	64.9822
SNRPN	-1.03196	2.77778	-12.6051	2.25521e-33	2.4772e-32	64.7822
RG9MTD3	-0.525838	2.56706	-12.6033	2.29794e-33	2.51949e-32	64.7636
SH2B3	-1.5141	5.79788	-12.6033	2.29822e-33	2.51949e-32	64.7635
LLGL2	-0.85879	3.42402	-12.5988	2.41034e-33	2.63982e-32	64.7162
RBM16	-0.818611	4.91369	-12.5976	2.4415e-33	2.67134e-32	64.7035
ALMS1	-0.551829	2.61999	-12.593	2.56396e-33	2.80259e-32	64.6549
TBC1D10A	-0.810278	4.41753	-12.5909	2.62125e-33	2.86243e-32	64.633
PRPF4	-0.818595	3.72343	-12.5799	2.94424e-33	3.21201e-32	64.5177
MS4A1	-2.17796	4.29219	-12.5739	3.13832e-33	3.4204e-32	64.4544
FGFBP2	-2.33734	4.93664	-12.571	3.23446e-33	3.52176e-32	64.4244
CUTA	-1.30523	7.19122	-12.5597	3.6456e-33	3.96556e-32	64.3057
GTPBP4	-0.821004	3.21365	-12.5532	3.90533e-33	4.24397e-32	64.2374
SLC25A37	0.971378	10.7323	12.5471	4.16728e-33	4.52424e-32	64.173
PYGL	1.19657	9.48179	12.5372	4.62509e-33	5.01641e-32	64.0696
C5orf53	-0.790214	2.23122	-12.5368	4.64127e-33	5.02909e-32	64.0661
GPR56	-1.20015	3.59292	-12.5356	4.70122e-33	5.08912e-32	64.0534
DLAT	-0.726498	2.71337	-12.5255	5.23267e-33	5.65897e-32	63.9471
EI24	-0.605604	3.53498	-12.5215	5.45669e-33	5.89555e-32	63.9055
RIC8B	-0.71464	3.15848	-12.5206	5.51005e-33	5.94745e-32	63.8959
RPS23	-1.28165	8.71617	-12.5083	6.27234e-33	6.76374e-32	63.7673
PIGP	-0.741528	3.20304	-12.5009	6.77901e-33	7.30308e-32	63.6902
POLE3	-0.9021	5.28585	-12.4892	7.66473e-33	8.24934e-32	63.5684
ACBD6	-0.586693	3.67964	-12.4865	7.89148e-33	8.48523e-32	63.5395
RAD50	-0.842843	3.06829	-12.4849	8.02499e-33	8.62052e-32	63.5228
THADA	-0.876821	4.25567	-12.4827	8.21107e-33	8.81196e-32	63.5001
KREMEN1	1.92674	5.97662	12.4796	8.48306e-33	9.09514e-32	63.4678
PCSK7	-1.0237	3.91929	-12.478	8.62617e-33	9.23973e-32	63.4512
HNRNPD	-0.814754	5.15767	-12.4752	8.88603e-33	9.50899e-32	63.4217
LTB	-1.39762	8.33889	-12.468	9.57991e-33	1.02417e-31	63.3471
NPM1	-1.36596	7.81667	-12.466	9.78747e-33	1.04446e-31	63.3259
CCT3	-1.18857	5.91406	-12.466	9.78828e-33	1.04446e-31	63.3258
UTP3	-1.15478	4.6901	-12.4612	1.02928e-32	1.09725e-31	63.2759
PPP2R2B	-0.754411	2.38086	-12.4577	1.068e-32	1.13744e-31	63.2393
ABL1	-0.675366	3.23124	-12.4479	1.18413e-32	1.25993e-31	63.1369
CHST7	-1.41827	3.02753	-12.4459	1.20945e-32	1.28564e-31	63.1159
KIAA1671	-0.673285	2.33797	-12.4426	1.2516e-32	1.32919e-31	63.0819
DDX55	-0.557179	3.13599	-12.4294	1.43781e-32	1.52549e-31	62.9443
SLC36A1	0.632195	3.73025	12.4284	1.45221e-32	1.53931e-31	62.9344
TTF1	-0.764868	4.41531	-12.4191	1.60159e-32	1.69605e-31	62.8373
ARHGEF9	-0.810896	2.90985	-12.4121	1.72433e-32	1.82258e-31	62.764
ITPA	-0.93723	4.62199	-12.4082	1.7959e-32	1.89645e-31	62.7237
C6orf136	-0.859902	3.38389	-12.407	1.81876e-32	1.91877e-31	62.7111
TXNDC17	1.26586	5.35317	12.4067	1.82332e-32	1.92178e-31	62.7087
RPL10A	-1.36587	9.17993	-12.4013	1.93009e-32	2.0324e-31	62.6522
PTMA	-0.615045	7.53863	-12.3984	1.989e-32	2.09246e-31	62.6224
FYCO1	-0.943875	3.54849	-12.3981	1.99559e-32	2.09742e-31	62.6191
POR	1.10156	4.82777	12.3932	2.10101e-32	2.20616e-31	62.568
CHD3	-0.592734	4.21408	-12.3882	2.21358e-32	2.32218e-31	62.5163
SNHG1	-0.832879	2.62869	-12.383	2.3368e-32	2.44687e-31	62.4625
GNLY	-2.40405	5.85432	-12.3798	2.41652e-32	2.52799e-31	62.4292
PDCD10	1.64358	6.5981	12.3723	2.61553e-32	2.73362e-31	62.3507
PHF15	-0.548999	3.28221	-12.3523	3.22376e-32	3.36617e-31	62.1433
CABC1	-1.42566	4.16115	-12.3497	3.31167e-32	3.45474e-31	62.1166
HEATR5B	-1.12778	4.27219	-12.3486	3.35142e-32	3.49296e-31	62.1048
SNRPA1	-0.804567	4.00404	-12.3476	3.38371e-32	3.52334e-31	62.0953
RIOK1	-0.576858	2.83967	-12.3473	3.39437e-32	3.53115e-31	62.0922
THOC2	-0.57597	4.10055	-12.3416	3.6027e-32	3.7444e-31	62.0331
SLC11A1	1.32804	5.90168	12.3397	3.67733e-32	3.81842e-31	62.0127
TBC1D9	-1.93064	3.4558	-12.337	3.77976e-32	3.92115e-31	61.9855
ZBTB38	-1.21427	4.91483	-12.3285	4.13195e-32	4.28255e-31	61.8971
RPL23A	-0.817756	11.3065	-12.3282	4.14586e-32	4.293e-31	61.8938
NPRL2	-0.966151	5.05153	-12.315	4.75502e-32	4.91923e-31	61.7578
UBE2J1	1.45544	7.48896	12.3055	5.25462e-32	5.43106e-31	61.6587
TMEM134	-0.683636	4.04259	-12.3024	5.42206e-32	5.59896e-31	61.6276
RPL19	-0.836209	11.1256	-12.2997	5.57886e-32	5.75558e-31	61.5993
MEX3C	-1.37282	3.10587	-12.2994	5.59502e-32	5.76694e-31	61.5964
SAE1	-0.575703	3.16401	-12.2993	5.60531e-32	5.77224e-31	61.5946
RBX1	1.55274	7.43281	12.2935	5.95236e-32	6.12399e-31	61.535
SORT1	1.9074	5.46523	12.2899	6.1811e-32	6.35349e-31	61.4976
NLRC4	1.26907	4.44638	12.2894	6.20861e-32	6.37591e-31	61.4932
AP3M2	-0.81044	3.18574	-12.2885	6.27017e-32	6.43324e-31	61.4834
CARKD	-1.01253	5.42174	-12.288	6.30518e-32	6.46325e-31	61.4779
NIP7	-0.756629	3.69651	-12.2809	6.78914e-32	6.95297e-31	61.4045
PAAF1	-0.534607	3.50954	-12.2799	6.85424e-32	7.01324e-31	61.3951
TWISTNB	-0.663395	3.0658	-12.2793	6.8993e-32	7.05289e-31	61.3886
MCTP2	1.38995	5.71972	12.2783	6.97258e-32	7.12131e-31	61.3781
FKBP5	1.67175	6.09681	12.276	7.14298e-32	7.2887e-31	61.3541
ADAM9	1.38553	4.8221	12.2726	7.3982e-32	7.54226e-31	61.3193
CYTH1	-0.80425	7.62555	-12.27	7.59923e-32	7.74016e-31	61.2927
VPRBP	-1.06233	4.46884	-12.2644	8.05561e-32	8.19755e-31	61.2349
SPG7	-1.01061	3.82129	-12.2581	8.60163e-32	8.74525e-31	61.1698
LRG1	1.59169	8.99942	12.2567	8.72435e-32	8.86197e-31	61.1558
ARRB2	0.886497	8.11077	12.2555	8.84269e-32	8.97196e-31	61.1424
MTSS1	-0.973208	3.61421	-12.2553	8.85599e-32	8.97196e-31	61.1409
SKIV2L2	-0.849335	3.62048	-12.2553	8.85665e-32	8.97196e-31	61.1408
STK16	0.750764	4.15811	12.2537	9.00707e-32	9.1161e-31	61.1241
TTC9	-1.45541	3.61867	-12.2524	9.12737e-32	9.22952e-31	61.111
EIF2AK3	-0.724934	2.47989	-12.251	9.26458e-32	9.35982e-31	61.0962
SH2D2A	-1.87976	3.87028	-12.2498	9.38021e-32	9.4681e-31	61.0839
TARBP1	-0.667847	2.82939	-12.248	9.55236e-32	9.63318e-31	61.0658
CCT4	-1.27612	6.53611	-12.2458	9.77113e-32	9.84494e-31	61.0434
VEZT	-0.629265	2.26142	-12.2453	9.82662e-32	9.89196e-31	61.0377
WDFY3	1.47679	5.3447	12.238	1.05986e-31	1.06594e-30	60.9627
FAM117B	-2.00789	4.58372	-12.2378	1.0618e-31	1.06694e-30	60.9609
THUMPD1	-1.08077	4.55902	-12.2349	1.09445e-31	1.09876e-30	60.9309
CX3CR1	-2.57037	8.02288	-12.2335	1.11037e-31	1.11375e-30	60.9166
C20orf24	0.765348	9.6826	12.2334	1.11206e-31	1.11444e-30	60.915
EPHA4	-0.616816	2.84262	-12.2299	1.15276e-31	1.1542e-30	60.8794
CIAO1	-0.760529	5.16297	-12.2219	1.25331e-31	1.25376e-30	60.7964
TUBGCP6	-0.60053	3.35718	-12.2079	1.44838e-31	1.44761e-30	60.653
C19orf38	1.10848	7.96819	12.2069	1.46374e-31	1.46165e-30	60.6425
CDC14A	-0.682881	3.06983	-12.2065	1.47004e-31	1.46663e-30	60.6382
ZC3H8	-0.626094	2.56944	-12.2037	1.51371e-31	1.50886e-30	60.6092
MLYCD	-0.580337	4.703	-12.2025	1.53249e-31	1.52623e-30	60.597
PDCL3	-0.774378	3.28533	-12.1972	1.61789e-31	1.60842e-30	60.5432
KLHL22	-0.558333	2.50296	-12.1964	1.63173e-31	1.62073e-30	60.5347
C9orf91	-0.8703	3.12872	-12.1948	1.65909e-31	1.64645e-30	60.5182
THAP7	-0.551703	3.04839	-12.1914	1.71955e-31	1.70494e-30	60.4827
TAGAP	-1.4103	5.24889	-12.1836	1.86418e-31	1.84671e-30	60.4026
FOXK1	-0.718199	3.60076	-12.1834	1.86722e-31	1.84809e-30	60.401
EXOSC6	-0.952344	3.14948	-12.1827	1.88141e-31	1.86049e-30	60.3935
SLAIN1	-0.711861	2.50658	-12.1787	1.96092e-31	1.93741e-30	60.3525
FBXO32	-0.887931	2.68124	-12.1646	2.26782e-31	2.23865e-30	60.2082
NUP107	-1.17597	3.99797	-12.1629	2.30852e-31	2.27682e-30	60.1906
PCMT1	1.19218	7.51033	12.1579	2.42974e-31	2.39414e-30	60.1398
DAZAP1	-0.829231	5.34078	-12.1579	2.43175e-31	2.39414e-30	60.139
RBM19	-0.665282	2.5798	-12.1566	2.46279e-31	2.42257e-30	60.1264
UBE2I	-0.754679	5.73286	-12.1556	2.48933e-31	2.44653e-30	60.1158
ZNF419	-0.520664	2.71721	-12.1535	2.54474e-31	2.49879e-30	60.094
DUSP14	-0.524557	2.50553	-12.1527	2.56482e-31	2.51631e-30	60.0862
POM121	-1.10087	5.51091	-12.1522	2.57713e-31	2.52617e-30	60.0814
CPEB4	1.37971	6.49158	12.1419	2.867e-31	2.80785e-30	59.9757
UXS1	-0.8353	4.19066	-12.1382	2.98014e-31	2.91611e-30	59.9373
BANK1	-1.3684	3.18676	-12.136	3.04939e-31	2.98127e-30	59.9146
KIAA0495	-0.66793	2.7719	-12.13	3.2417e-31	3.16653e-30	59.8539
SHQ1	-0.53497	2.51195	-12.1252	3.40691e-31	3.325e-30	59.8046
INPP5B	-0.516282	2.72414	-12.1248	3.42197e-31	3.3368e-30	59.8002
UBFD1	-0.939009	4.0006	-12.1239	3.45187e-31	3.36302e-30	59.7916
TMEM204	-0.616752	2.78231	-12.1191	3.63004e-31	3.53354e-30	59.7417
USP36	-0.588415	2.62188	-12.1172	3.70185e-31	3.6003e-30	59.7223
CTBP1	-0.727465	7.07008	-12.113	3.8658e-31	3.7565e-30	59.6793
ZNF195	-0.646138	2.91342	-12.1095	4.00845e-31	3.89174e-30	59.6433
ARF6	-0.73593	7.41131	-12.107	4.11218e-31	3.98899e-30	59.618
EXOSC9	-0.860699	4.83269	-12.1018	4.33862e-31	4.20501e-30	59.5648
TAB1	-0.647407	2.89973	-12.0878	5.01085e-31	4.85234e-30	59.422
DZIP3	-0.640973	2.56437	-12.0837	5.22549e-31	5.05582e-30	59.3804
ZCCHC14	-0.732215	2.92555	-12.0789	5.49165e-31	5.30876e-30	59.3311
PAXIP1	-0.844952	2.91669	-12.078	5.54181e-31	5.35262e-30	59.3221
GRPEL2	-1.05118	3.47357	-12.0775	5.5702e-31	5.37541e-30	59.317
IFT20	0.772978	4.42999	12.0741	5.77007e-31	5.5635e-30	59.2821
DHRS13	1.65357	7.03468	12.0708	5.96827e-31	5.74965e-30	59.2486
ZNF234	-0.907342	3.71765	-12.0699	6.02245e-31	5.79687e-30	59.2396
ECHS1	-0.804979	4.84636	-12.0661	6.26106e-31	6.02137e-30	59.2011
TSPAN3	-0.976591	3.04205	-12.047	7.62375e-31	7.3256e-30	59.0058
ZNF212	-0.683182	2.98106	-12.0467	7.64848e-31	7.34307e-30	59.0026
VPREB3	-1.46099	3.10581	-12.0419	8.03002e-31	7.69618e-30	58.9543
PPP1R3D	1.29919	5.8352	12.0353	8.5948e-31	8.23044e-30	58.8869
JMY	-0.987566	2.95662	-12.0348	8.64461e-31	8.27107e-30	58.8812
IPO7	-0.937241	3.32649	-12.0283	9.23963e-31	8.83283e-30	58.8152
ABI3	-1.28939	3.96735	-12.0279	9.27217e-31	8.85638e-30	58.8117
MTERFD1	-0.823972	2.76738	-12.0235	9.69872e-31	9.25592e-30	58.7671
MKNK1	1.43649	5.24533	12.0214	9.91253e-31	9.45191e-30	58.7454
ZNF84	-0.74773	3.09713	-12.0192	1.01393e-30	9.6599e-30	58.723
RPAP1	-0.540437	2.92401	-12.0177	1.0299e-30	9.80375e-30	58.7075
ARMC1	-0.81653	4.2954	-12.0161	1.04723e-30	9.96021e-30	58.691
RTTN	-0.538397	2.64959	-12.0159	1.04923e-30	9.97084e-30	58.6891
CASD1	-0.921109	3.30821	-12.0148	1.06064e-30	1.00707e-29	58.6783
WDR36	-0.630681	2.9185	-12.0114	1.0987e-30	1.04233e-29	58.6434
OSGEP	-0.850356	4.41958	-12.011	1.10274e-30	1.04527e-29	58.6398
SARM1	-0.519135	2.39011	-12.0019	1.21092e-30	1.14684e-29	58.5469
PTPRCAP	-1.79612	5.16255	-12.001	1.22274e-30	1.15706e-29	58.5373
GLT1D1	0.797371	5.33051	11.9987	1.25104e-30	1.18284e-29	58.5146
FAM169A	-0.577463	2.43054	-11.9948	1.30192e-30	1.22991e-29	58.4751
MFSD6	-0.752131	3.09286	-11.9925	1.33391e-30	1.25891e-29	58.451
PDE7A	-0.852248	4.30347	-11.9924	1.33487e-30	1.25891e-29	58.4503
DNPEP	-0.614362	2.97724	-11.9805	1.50809e-30	1.42108e-29	58.3293
ZNF187	-0.543572	2.47543	-11.973	1.62715e-30	1.53199e-29	58.254
GIMAP1	-1.17878	5.00239	-11.964	1.78427e-30	1.6785e-29	58.1626
NFATC1	-0.836994	4.10238	-11.9623	1.8154e-30	1.70635e-29	58.1454
POP5	-1.0747	3.52573	-11.962	1.82225e-30	1.71136e-29	58.1417
RAD17	-0.775165	3.62681	-11.9588	1.88322e-30	1.76713e-29	58.109
DVL1	-0.744448	4.63477	-11.9582	1.89311e-30	1.77493e-29	58.1038
MYC	-1.95851	5.9261	-11.9544	1.96858e-30	1.84415e-29	58.0651
SFRS7	-1.14622	5.75523	-11.9533	1.99204e-30	1.86456e-29	58.0533
C12orf23	-1.04263	2.64418	-11.9393	2.29808e-30	2.14743e-29	57.9116
ANXA1	1.45046	9.40586	11.935	2.40122e-30	2.24194e-29	57.8681
YOD1	2.47893	7.6006	11.9334	2.4396e-30	2.27588e-29	57.8524
MAP7D3	-0.584391	2.8725	-11.9329	2.45323e-30	2.28669e-29	57.8468
NARS2	-0.553307	2.50512	-11.9319	2.47819e-30	2.30804e-29	57.8368
MRPL9	-0.758952	4.64943	-11.9311	2.49912e-30	2.3256e-29	57.8285
PHF14	-0.738159	3.93186	-11.9245	2.67064e-30	2.48315e-29	57.7626
EIF1AD	-0.985586	5.19837	-11.9207	2.77754e-30	2.58039e-29	57.7237
TP53I11	0.747969	3.77968	11.9151	2.9399e-30	2.72897e-29	57.6674
ODF2	-0.646441	3.63949	-11.9146	2.95589e-30	2.74154e-29	57.662
ILKAP	-0.884818	4.85043	-11.9111	3.06453e-30	2.83995e-29	57.6262
MYO9A	-0.577976	3.8381	-11.9088	3.13554e-30	2.90336e-29	57.6035
BLMH	-0.893729	3.59396	-11.9042	3.2858e-30	3.03997e-29	57.5571
DACH1	2.01074	4.58447	11.9033	3.31588e-30	3.06528e-29	57.5481
NPCDR1	-0.920965	2.34937	-11.903	3.32837e-30	3.07429e-29	57.5443
REV1	-0.62938	3.14701	-11.9013	3.38579e-30	3.12474e-29	57.5274
C5orf25	-0.867705	3.07939	-11.9011	3.39049e-30	3.12651e-29	57.526
GCA	1.22189	9.38981	11.8972	3.52853e-30	3.25112e-29	57.4864
FXYD5	-0.968345	7.65062	-11.8966	3.55274e-30	3.27074e-29	57.4797
EMB	2.11785	6.28608	11.8964	3.55926e-30	3.27405e-29	57.4778
NDUFV1	-0.912596	4.52502	-11.8895	3.81736e-30	3.50859e-29	57.4084
UPRT	-0.695886	2.7311	-11.8891	3.8336e-30	3.52063e-29	57.4042
MTHFD1	-0.898509	2.98242	-11.8886	3.85166e-30	3.53432e-29	57.3995
LIMD1	-0.645428	3.3555	-11.8883	3.86609e-30	3.54465e-29	57.3958
ZNF3	-0.538531	3.51394	-11.8872	3.90907e-30	3.58113e-29	57.3849
KARS	-0.964233	7.57646	-11.8855	3.97423e-30	3.63785e-29	57.3685
SF3B14	1.03107	6.6179	11.8838	4.04336e-30	3.69811e-29	57.3514
C8orf83	0.930143	5.56899	11.8801	4.20031e-30	3.83826e-29	57.3136
PSTPIP2	1.6169	7.56764	11.88	4.20345e-30	3.83826e-29	57.3129
KIAA1279	-0.646374	2.91302	-11.8683	4.73846e-30	4.32327e-29	57.1941
USPL1	-1.107	3.53071	-11.859	5.20442e-30	4.74137e-29	57.1011
PEX3	-0.670614	2.37113	-11.859	5.20518e-30	4.74137e-29	57.101
FLOT2	1.00019	6.14661	11.8572	5.30033e-30	4.82412e-29	57.083
ZDHHC14	-0.546877	2.32843	-11.8501	5.70018e-30	5.18383e-29	57.0109
RPL32	-0.667016	5.91109	-11.8454	5.97791e-30	5.432e-29	56.9637
SIPA1L2	1.93915	6.7236	11.8444	6.03791e-30	5.48207e-29	56.9538
STAG3L3	-1.11307	5.16041	-11.8383	6.4246e-30	5.82844e-29	56.8923
FAM153B	-0.742686	2.5579	-11.8347	6.66225e-30	6.03914e-29	56.8563
ANAPC5	-0.833264	6.93314	-11.8344	6.68052e-30	6.05081e-29	56.8535
CNOT10	-0.654284	3.6331	-11.8299	6.99454e-30	6.33012e-29	56.808
RAB11FIP3	-0.626767	2.90481	-11.8262	7.26452e-30	6.56915e-29	56.7704
ERCC3	-0.669558	2.53755	-11.8225	7.54433e-30	6.81666e-29	56.733
ST3GAL4	1.15532	5.21087	11.821	7.65911e-30	6.9148e-29	56.718
PTPRM	-0.788866	2.78639	-11.8204	7.70422e-30	6.94993e-29	56.7122
ADH5	-0.892842	3.83153	-11.8156	8.08754e-30	7.28985e-29	56.664
WDR5	-0.542346	3.30795	-11.8153	8.11631e-30	7.30989e-29	56.6605
CD58	1.41013	6.83202	11.8142	8.20055e-30	7.37984e-29	56.6503
ABT1	-0.690617	5.38889	-11.8113	8.45184e-30	7.59987e-29	56.6204
ZNF764	-0.666364	3.02483	-11.8042	9.0788e-30	8.15708e-29	56.5494
HIGD2A	-0.887059	6.93691	-11.7999	9.47864e-30	8.50951e-29	56.5067
ATXN10	-0.845336	5.11485	-11.7993	9.53633e-30	8.55445e-29	56.5007
MAGEH1	-0.592645	2.32491	-11.7953	9.93957e-30	8.90904e-29	56.4596
SCAMP3	-1.04962	4.42611	-11.791	1.03794e-29	9.2916e-29	56.4167
CRYGS	-0.632174	2.62517	-11.7909	1.0383e-29	9.2916e-29	56.4163
KHDRBS1	-0.942714	6.15134	-11.7857	1.09531e-29	9.79399e-29	56.3633
ASCC3	-0.681008	2.44744	-11.7758	1.21024e-29	1.0813e-28	56.2644
C17orf68	-0.565968	3.59227	-11.7751	1.21924e-29	1.08848e-28	56.2571
NARS	-0.909624	5.1382	-11.7736	1.2369e-29	1.10336e-28	56.2428
ASF1A	-0.896827	3.47239	-11.7706	1.27612e-29	1.13744e-28	56.2119
ZNF828	-0.707192	3.0551	-11.7618	1.39488e-29	1.24231e-28	56.1236
GPR141	1.53284	4.90232	11.755	1.49293e-29	1.32858e-28	56.0563
PREPL	-0.675596	2.75489	-11.7546	1.49935e-29	1.33323e-28	56.052
NEK1	-0.836969	3.46053	-11.7416	1.71056e-29	1.51984e-28	55.9214
ZNF773	-0.835999	3.2826	-11.7367	1.79728e-29	1.59562e-28	55.8724
MGAM	1.51731	7.97492	11.7359	1.81184e-29	1.60728e-28	55.8644
EXOSC4	2.35396	6.61946	11.7297	1.9286e-29	1.7095e-28	55.8025
C12orf43	-0.633392	2.9001	-11.7246	2.02932e-29	1.79735e-28	55.752
SERBP1	-0.589104	5.2322	-11.7216	2.09248e-29	1.85183e-28	55.7216
C11orf2	-1.08009	4.82357	-11.7192	2.14307e-29	1.89511e-28	55.6979
IDH3A	-0.735068	2.98395	-11.7146	2.24393e-29	1.98273e-28	55.6523
SLC25A32	-1.00415	2.68516	-11.7142	2.25449e-29	1.99049e-28	55.6477
NSUN4	-0.543491	3.10128	-11.7137	2.26574e-29	1.99885e-28	55.6427
RRAS2	-1.35812	3.13933	-11.709	2.37549e-29	2.09402e-28	55.5958
PIP4K2B	-0.954957	5.21024	-11.7028	2.5274e-29	2.22618e-28	55.5344
SNHG12	-1.12001	4.372	-11.7011	2.57193e-29	2.26362e-28	55.5171
NOSIP	-0.931531	7.0169	-11.6953	2.72681e-29	2.39805e-28	55.4591
NAIP	1.83561	7.36183	11.6849	3.02669e-29	2.6576e-28	55.3557
SNORD72	-0.69027	2.73772	-11.6848	3.02951e-29	2.658e-28	55.3548
BST1	1.31508	8.5598	11.6834	3.07348e-29	2.69447e-28	55.3405
MESDC2	-0.601751	4.11203	-11.6686	3.56737e-29	3.12257e-28	55.1928
DOK3	0.933692	6.03705	11.6676	3.60455e-29	3.15264e-28	55.1825
PHTF1	1.09903	3.75308	11.661	3.85116e-29	3.36571e-28	55.1169
CARD16	1.27991	5.65624	11.6599	3.89329e-29	3.39988e-28	55.1061
GPATCH2	-1.12452	3.55836	-11.6571	4.0043e-29	3.49409e-28	55.0782
ACAA1	0.654378	5.33794	11.6509	4.25905e-29	3.71349e-28	55.0171
CD8A	-1.87753	4.20611	-11.6475	4.4107e-29	3.84273e-28	54.9824
GTPBP6	-0.836353	4.1804	-11.6454	4.50214e-29	3.91934e-28	54.9621
CCND2	-1.3635	4.8822	-11.6409	4.70898e-29	4.09623e-28	54.9175
PHOSPHO2	-0.522659	2.34196	-11.6378	4.85924e-29	4.22366e-28	54.8864
EIF2S3	-0.824457	6.75031	-11.6282	5.35146e-29	4.64789e-28	54.7908
GTPBP8	-1.03195	4.67012	-11.625	5.52375e-29	4.79121e-28	54.7593
PUM1	-0.962847	5.51633	-11.625	5.52503e-29	4.79121e-28	54.7591
IKZF1	-0.595614	5.74694	-11.6242	5.56876e-29	4.8254e-28	54.7513
SLC25A6	-1.09	9.10343	-11.6241	5.57554e-29	4.82754e-28	54.7501
CIB1	-0.903881	7.28654	-11.6166	6.008e-29	5.19797e-28	54.676
CDK5RAP2	2.34911	5.6412	11.6096	6.44518e-29	5.5719e-28	54.6064
PMS1	-1.05792	2.85058	-11.6084	6.52343e-29	5.63519e-28	54.5945
UBE2Q2	-1.09601	3.36246	-11.6073	6.59455e-29	5.69224e-28	54.5837
ESF1	-0.998	3.2291	-11.603	6.88841e-29	5.94132e-28	54.5405
IL18R1	2.30306	5.56832	11.6026	6.91239e-29	5.95742e-28	54.5371
RINT1	-0.701339	2.49599	-11.5959	7.39851e-29	6.37148e-28	54.4697
SATB1	-1.15575	6.18165	-11.5949	7.47225e-29	6.43004e-28	54.4599
C14orf43	-1.37229	5.03217	-11.594	7.5369e-29	6.48069e-28	54.4513
MADD	-0.593318	4.11008	-11.5895	7.88059e-29	6.77102e-28	54.4071
ACTL6A	-1.01381	4.72506	-11.5866	8.11205e-29	6.96455e-28	54.3784
PRPF31	-0.634934	3.65459	-11.5859	8.17503e-29	7.01325e-28	54.3708
STARD7	-0.912686	5.74053	-11.5724	9.35648e-29	8.01453e-28	54.237
NUDC	-0.875822	5.95538	-11.5718	9.41296e-29	8.05675e-28	54.231
APEX1	-1.31197	6.43462	-11.5675	9.81857e-29	8.3975e-28	54.1892
PAOX	-0.537465	2.68835	-11.5673	9.84057e-29	8.4099e-28	54.187
SMYD2	-1.1635	3.85934	-11.5664	9.93401e-29	8.48328e-28	54.1776
QARS	-0.708017	4.84782	-11.5655	1.00243e-28	8.55385e-28	54.1686
FUT7	1.4079	5.84186	11.5617	1.04124e-28	8.87828e-28	54.131
ABCE1	-0.840616	3.6261	-11.5611	1.04697e-28	8.9203e-28	54.1255
ERAP1	-0.557667	3.76581	-11.5595	1.06388e-28	9.05756e-28	54.1097
GRK6	0.868684	6.10571	11.5591	1.06821e-28	9.08747e-28	54.1056
MIIP	0.789948	5.63026	11.5585	1.07449e-28	9.134e-28	54.0998
GAPDH	0.598054	11.1011	11.5555	1.1078e-28	9.41e-28	54.0696
BOLA1	-0.73206	2.39518	-11.5496	1.17445e-28	9.96859e-28	54.0117
C20orf3	1.11338	8.249	11.5475	1.19884e-28	1.01679e-27	53.9913
ZNF362	-0.969759	5.56123	-11.5469	1.20641e-28	1.02244e-27	53.985
GNB2L1	-0.720687	11.177	-11.5412	1.27666e-28	1.08115e-27	53.929
EXT2	-0.53806	2.79692	-11.5327	1.39033e-28	1.17653e-27	53.8444
PARN	-1.0283	4.94665	-11.5273	1.46689e-28	1.24038e-27	53.7913
LIME1	-1.0141	3.88467	-11.5269	1.47224e-28	1.24396e-27	53.7877
ERP29	-1.04457	7.67018	-11.5268	1.47503e-28	1.24538e-27	53.7858
FAM113A	-0.706074	3.64118	-11.524	1.51622e-28	1.2792e-27	53.7585
CAND1	-0.773017	2.82336	-11.517	1.62618e-28	1.37093e-27	53.6891
FBL	-1.38977	6.56072	-11.5109	1.72696e-28	1.4548e-27	53.6295
TOMM20	-1.26447	5.30949	-11.5103	1.73796e-28	1.46297e-27	53.6232
TMEM120A	1.33274	7.129	11.5077	1.784e-28	1.5006e-27	53.5973
TARDBP	-0.86248	5.64363	-11.5051	1.82912e-28	1.5374e-27	53.5726
MTMR12	-0.803277	3.65035	-11.5027	1.87394e-28	1.57389e-27	53.5486
MIS12	-0.697808	3.11103	-11.5012	1.90311e-28	1.59719e-27	53.5333
PPIA	-0.740781	6.9242	-11.4966	1.99169e-28	1.67027e-27	53.4882
DAP3	-0.608131	5.28354	-11.4942	2.03967e-28	1.70923e-27	53.4646
RBM4	-0.73626	5.81165	-11.4915	2.09546e-28	1.75468e-27	53.4378
MMS19	-0.648651	3.50233	-11.4843	2.2512e-28	1.88368e-27	53.3668
PSIP1	-0.6905	3.15972	-11.482	2.30204e-28	1.92478e-27	53.3446
STAG3L2	-1.12685	5.60988	-11.4797	2.35567e-28	1.96815e-27	53.3218
CAPG	1.36742	7.41756	11.4793	2.36593e-28	1.97525e-27	53.3175
XPNPEP3	-0.687673	3.8367	-11.4761	2.44125e-28	2.0351e-27	53.2865
CBY1	-0.522275	2.95445	-11.4743	2.48499e-28	2.07003e-27	53.2689
ZNF124	-0.640967	2.70633	-11.4706	2.5785e-28	2.14633e-27	53.2322
B3GALT6	-0.637134	3.42639	-11.4695	2.60833e-28	2.16954e-27	53.2208
FCGR1B	1.93123	5.18661	11.4679	2.64857e-28	2.20137e-27	53.2057
OTUD4	-0.98001	4.13298	-11.4668	2.6785e-28	2.2246e-27	53.1945
EXOC2	-0.594134	3.07834	-11.4659	2.70112e-28	2.24024e-27	53.1862
SP4	-1.00124	3.52635	-11.4659	2.70132e-28	2.24024e-27	53.1861
PTDSS1	-0.946606	5.32482	-11.4575	2.93822e-28	2.4349e-27	53.1028
YDJC	-0.614093	4.72247	-11.4474	3.24593e-28	2.68791e-27	53.0041
PPHLN1	-0.736666	4.79881	-11.4465	3.27559e-28	2.71047e-27	52.9951
TBCD	-0.726108	4.23583	-11.4441	3.35299e-28	2.77247e-27	52.972
C19orf12	-0.947841	3.65229	-11.4431	3.38809e-28	2.79942e-27	52.9616
JAK3	0.510147	4.31737	11.4373	3.5879e-28	2.96233e-27	52.9048
FOXO1	-0.988257	6.02377	-11.4323	3.77174e-28	3.11183e-27	52.8553
HSBP1	0.81287	6.48248	11.4301	3.85278e-28	3.17635e-27	52.8343
PYCR2	-0.685905	3.93841	-11.4282	3.92703e-28	3.23518e-27	52.8153
WDR73	-0.827611	4.23652	-11.4281	3.93068e-28	3.23581e-27	52.8144
SLC25A36	-0.862367	4.04375	-11.4269	3.97845e-28	3.27273e-27	52.8024
RALGAPA1	-0.514912	2.99233	-11.4254	4.03832e-28	3.31954e-27	52.7876
PDS5A	-0.716775	3.87765	-11.4226	4.1522e-28	3.41065e-27	52.7601
SMPD3	-0.807642	2.49674	-11.4198	4.26699e-28	3.50237e-27	52.7331
TMCO4	-0.519878	2.81501	-11.4141	4.51496e-28	3.7032e-27	52.6771
PXK	0.837839	5.45584	11.4137	4.53136e-28	3.71392e-27	52.6735
NSUN7	1.8269	5.18791	11.4136	4.53594e-28	3.71496e-27	52.6725
RNF157	-0.824625	2.85059	-11.4111	4.65347e-28	3.80843e-27	52.6471
ACADSB	-0.58424	2.20621	-11.4096	4.71888e-28	3.85915e-27	52.6333
PEX1	-0.679127	2.62181	-11.4083	4.78149e-28	3.9075e-27	52.6202
LIPT1	-0.883599	2.89129	-11.4049	4.94754e-28	4.04025e-27	52.5864
XRRA1	-1.47814	4.03624	-11.4043	4.97503e-28	4.05974e-27	52.5809
ZNF557	-0.879197	4.3034	-11.3983	5.27965e-28	4.30518e-27	52.522
RFC5	-0.733381	2.91974	-11.3976	5.317e-28	4.33249e-27	52.515
KIAA0562	-0.502359	3.56968	-11.3968	5.35617e-28	4.36123e-27	52.5078
CLEC4E	1.44857	7.49179	11.3937	5.5223e-28	4.48997e-27	52.4775
MARCKSL1	-0.767655	4.88622	-11.3915	5.64323e-28	4.58497e-27	52.456
FNTA	-0.896557	7.57409	-11.3913	5.65948e-28	4.59484e-27	52.4532
CALHM2	-1.22081	4.45109	-11.3881	5.83893e-28	4.7371e-27	52.4223
LEO1	-0.519145	2.49768	-11.3847	6.0373e-28	4.8945e-27	52.3891
CD8B	-1.29369	2.88013	-11.3836	6.10517e-28	4.94593e-27	52.3781
SLC25A15	-0.524799	2.68852	-11.378	6.45319e-28	5.2241e-27	52.3231
CLEC10A	-1.33715	3.20338	-11.3748	6.66116e-28	5.38468e-27	52.2917
CSE1L	-0.945039	3.85963	-11.3714	6.88663e-28	5.56293e-27	52.2587
TRAT1	-1.37534	2.90321	-11.3697	7.00412e-28	5.65376e-27	52.2419
TPD52	-1.24247	2.85347	-11.3683	7.10183e-28	5.7285e-27	52.2282
ICK	-0.629491	2.46684	-11.3613	7.60781e-28	6.13222e-27	52.16
METTL8	-0.856494	2.66196	-11.3596	7.73869e-28	6.23323e-27	52.1431
QSER1	-0.939801	3.44228	-11.3593	7.75867e-28	6.24484e-27	52.1406
SLC37A3	0.98211	3.53179	11.3573	7.91209e-28	6.36375e-27	52.1212
BAG5	-0.794318	5.02421	-11.3564	7.98428e-28	6.41721e-27	52.1122
METTL2A	-0.616603	3.47111	-11.3563	7.99092e-28	6.41794e-27	52.1113
FTSJ2	-0.686788	3.36145	-11.3557	8.03647e-28	6.4499e-27	52.1057
BCAT2	-0.696093	3.04345	-11.3547	8.11707e-28	6.50993e-27	52.0958
CHCHD10	-1.19065	4.99145	-11.3534	8.22559e-28	6.59224e-27	52.0827
CYP1B1	2.0967	7.61741	11.3491	8.57941e-28	6.87088e-27	52.0409
ZNF142	-0.51741	2.56972	-11.3467	8.78224e-28	7.0283e-27	52.0178
CAPRIN2	-1.1509	4.60488	-11.3452	8.91576e-28	7.13007e-27	52.0028
CDK6	-0.782699	3.02522	-11.3449	8.94111e-28	7.14523e-27	52
EBAG9	-0.964567	3.60932	-11.3416	9.23988e-28	7.3784e-27	51.9674
C14orf126	-0.626032	2.80501	-11.3415	9.24606e-28	7.3784e-27	51.9668
TMEM14A	-0.526244	2.56307	-11.336	9.76027e-28	7.78321e-27	51.9131
GALT	-0.902104	4.54904	-11.323	1.10899e-27	8.83722e-27	51.7866
NHP2	-1.1978	5.87309	-11.3218	1.12252e-27	8.93871e-27	51.7746
ENTPD1	1.03253	5.39958	11.3191	1.15263e-27	9.17192e-27	51.7483
LCN2	3.69042	9.24586	11.3176	1.17038e-27	9.30654e-27	51.7332
UCKL1	-0.59796	2.88176	-11.3135	1.21781e-27	9.6768e-27	51.6938
OXA1L	-0.641844	5.01576	-11.3104	1.25617e-27	9.97459e-27	51.6631
MYST2	-0.672021	4.7934	-11.3073	1.29516e-27	1.02769e-26	51.6328
DNAJC10	-0.642882	2.75683	-11.3026	1.35536e-27	1.0747e-26	51.5878
C3orf17	-0.541047	3.00787	-11.3008	1.38005e-27	1.0935e-26	51.5699
ADO	-0.717956	3.81569	-11.2994	1.3987e-27	1.10749e-26	51.5566
LIMK2	1.1213	5.63383	11.2968	1.43499e-27	1.13542e-26	51.5312
SLC16A3	0.893632	7.58245	11.2946	1.4662e-27	1.1593e-26	51.5099
PANK4	-1.0396	3.86786	-11.291	1.52019e-27	1.20114e-26	51.4741
ZNF706	-0.910855	6.8458	-11.287	1.58118e-27	1.24846e-26	51.4351
UHRF2	-1.09187	5.42349	-11.2822	1.65632e-27	1.30686e-26	51.3891
UBR4	1.048	6.10225	11.2791	1.70767e-27	1.34548e-26	51.3589
FOXJ3	-1.12819	5.62348	-11.2758	1.76457e-27	1.38933e-26	51.3264
MGMT	-0.998917	3.47241	-11.2696	1.87494e-27	1.47416e-26	51.2663
FES	1.00534	6.78004	11.2672	1.9195e-27	1.50814e-26	51.243
WDR13	0.695852	6.60244	11.2666	1.93131e-27	1.51636e-26	51.2369
CHPT1	1.38418	8.89117	11.2646	1.96863e-27	1.54458e-26	51.218
KHSRP	-0.601362	4.73428	-11.2627	2.00636e-27	1.57308e-26	51.1991
PTGER4	-2.12484	5.85778	-11.2584	2.09132e-27	1.6374e-26	51.1581
CSF1R	-0.774482	3.15805	-11.2564	2.13427e-27	1.66986e-26	51.1379
GANAB	-0.68279	4.28436	-11.2548	2.16748e-27	1.69465e-26	51.1226
C20orf4	-0.646858	3.35988	-11.2497	2.27855e-27	1.78025e-26	51.0731
TAF1C	-0.768659	3.17699	-11.2485	2.30446e-27	1.79925e-26	51.0619
AMIGO2	-1.20398	3.03242	-11.2455	2.37467e-27	1.85277e-26	51.0322
RPS25	-0.747675	7.00933	-11.2437	2.41705e-27	1.88453e-26	51.0146
IL4R	1.18275	4.74211	11.2412	2.4764e-27	1.92945e-26	50.9906
ARMCX5	-0.673668	2.55943	-11.2371	2.57691e-27	2.00637e-26	50.9512
RCN1	-0.740445	3.26871	-11.237	2.58113e-27	2.00826e-26	50.9496
LTV1	-0.617332	2.59476	-11.234	2.65699e-27	2.06585e-26	50.9209
KRIT1	-0.615219	3.62798	-11.2271	2.84189e-27	2.20808e-26	50.8542
ZNF266	-1.41225	5.51413	-11.226	2.87321e-27	2.23087e-26	50.8434
PLSCR1	1.57702	7.49131	11.225	2.90036e-27	2.25039e-26	50.834
MRPS35	-1.01622	3.43847	-11.2245	2.91725e-27	2.26193e-26	50.8283
C7orf31	-0.512882	2.35246	-11.2193	3.06897e-27	2.37628e-26	50.778
PDHB	-0.875521	6.2905	-11.2139	3.23292e-27	2.5015e-26	50.7265
SLC25A45	-0.750546	4.53392	-11.21	3.35912e-27	2.59735e-26	50.6885
RPL15	-1.10445	8.44517	-11.2088	3.39979e-27	2.62698e-26	50.6766
TMEM209	-0.736409	2.43096	-11.2041	3.55818e-27	2.74747e-26	50.6315
UFD1L	0.649416	6.31264	11.2037	3.57353e-27	2.75743e-26	50.6272
PBX4	-0.722514	2.86914	-11.2021	3.62966e-27	2.79881e-26	50.6118
AGFG1	1.56437	5.49525	11.1964	3.83894e-27	2.95815e-26	50.5563
ZNF17	-0.563354	2.6738	-11.1904	4.0674e-27	3.13204e-26	50.499
SP140L	-0.977745	4.85534	-11.1892	4.11784e-27	3.1687e-26	50.4868
TAF6	-0.530154	3.99784	-11.1879	4.16719e-27	3.20447e-26	50.475
MED6	-0.696854	4.21983	-11.1874	4.19003e-27	3.21983e-26	50.4696
PIK3R1	-0.78626	4.65119	-11.182	4.41408e-27	3.38967e-26	50.418
RALGAPA2	0.727925	4.65829	11.1783	4.57644e-27	3.51195e-26	50.3822
BTN3A1	-1.29714	4.994	-11.1722	4.85742e-27	3.72502e-26	50.3231
NUP54	-1.00379	3.59562	-11.1696	4.98139e-27	3.81748e-26	50.2982
MKI67IP	-0.909792	4.29327	-11.1658	5.17131e-27	3.96031e-26	50.2611
EHMT1	-0.953865	5.59203	-11.1647	5.22466e-27	3.99843e-26	50.2509
CS	-0.864247	6.63538	-11.1621	5.36313e-27	4.10161e-26	50.225
NAA15	-0.946508	3.41425	-11.1585	5.55402e-27	4.2447e-26	50.1904
C12orf41	-1.14982	4.20933	-11.1572	5.62595e-27	4.29673e-26	50.1776
KDSR	-0.568167	2.62372	-11.1552	5.7335e-27	4.37589e-26	50.1589
ZNF345	-0.699879	2.82478	-11.1518	5.92659e-27	4.52019e-26	50.1261
FOLR3	2.41136	6.85571	11.1484	6.12653e-27	4.6695e-26	50.0932
IL10RB	0.798933	8.55113	11.1462	6.26073e-27	4.76854e-26	50.0717
MID1IP1	-1.09405	5.34285	-11.1437	6.41564e-27	4.88321e-26	50.0475
AQP9	1.14221	7.87028	11.1363	6.89007e-27	5.23365e-26	49.9768
IPO9	-0.795785	3.13657	-11.1334	7.08571e-27	5.37497e-26	49.9491
ASPH	1.26513	3.66946	11.1299	7.33147e-27	5.55763e-26	49.9153
BCL6	1.22025	9.5831	11.1234	7.8125e-27	5.91828e-26	49.8524
MOAP1	-1.33731	4.82738	-11.1036	9.46399e-27	7.1645e-26	49.6624
IVD	-0.661878	3.78741	-11.1033	9.4929e-27	7.18153e-26	49.6594
WWOX	-0.555613	2.62625	-11.102	9.61551e-27	7.26937e-26	49.6467
ADAM28	-0.690651	2.63431	-11.0997	9.83312e-27	7.42888e-26	49.6245
EZR	-0.974913	5.00063	-11.0954	1.02557e-26	7.74294e-26	49.5828
UBA2	-1.00782	3.52246	-11.0939	1.04027e-26	7.84862e-26	49.5687
SFRS11	-0.965795	5.9157	-11.0906	1.07402e-26	8.09783e-26	49.5371
USP14	-0.623486	4.08245	-11.0861	1.12179e-26	8.45224e-26	49.494
APRT	-1.11895	6.36173	-11.0844	1.141e-26	8.59121e-26	49.4772
PDIA3	-0.666039	5.03932	-11.0839	1.14648e-26	8.62674e-26	49.4724
EEF1G	-0.944336	9.16771	-11.0825	1.16189e-26	8.73681e-26	49.4592
TEF	-0.501399	2.61686	-11.0813	1.17572e-26	8.83486e-26	49.4475
WDR59	-0.536078	3.06961	-11.0803	1.18706e-26	8.9141e-26	49.438
MRPS6	-1.00167	4.86522	-11.0802	1.18847e-26	8.91869e-26	49.4368
AGAP5	-0.703825	4.19903	-11.076	1.23708e-26	9.27726e-26	49.3971
ULK2	-0.608448	2.59769	-11.0745	1.25602e-26	9.41302e-26	49.382
TKTL1	-1.02247	2.46353	-11.0736	1.26609e-26	9.4821e-26	49.3741
POLR3E	-0.851368	3.35471	-11.0646	1.38112e-26	1.03367e-25	49.288
RPL7L1	-0.689335	4.32314	-11.0605	1.43746e-26	1.0744e-25	49.2484
PPAT	-0.574265	2.9418	-11.0567	1.49112e-26	1.11303e-25	49.2121
DENND4C	-0.826966	3.21733	-11.0553	1.51209e-26	1.12793e-25	49.1982
CAPRIN1	-0.673943	4.79142	-11.0525	1.55397e-26	1.1584e-25	49.1712
DSTN	-0.999341	6.0726	-11.0507	1.58045e-26	1.17735e-25	49.1544
QTRTD1	-0.625896	2.71259	-11.0491	1.60492e-26	1.19478e-25	49.1392
NKRF	-0.849144	3.3635	-11.0467	1.64343e-26	1.22264e-25	49.1157
C4orf14	-1.07682	5.16152	-11.0442	1.68262e-26	1.25097e-25	49.0924
MINA	-0.968967	3.9825	-11.0436	1.69236e-26	1.25738e-25	49.0867
YIPF1	0.891883	7.51133	11.0431	1.70047e-26	1.26256e-25	49.0819
ADRB2	-1.17993	5.52247	-11.0413	1.73078e-26	1.28422e-25	49.0644
MAGEF1	-0.76379	3.20487	-11.0396	1.75923e-26	1.30446e-25	49.0483
ARL8A	0.748126	4.89618	11.0349	1.84111e-26	1.36428e-25	49.0032
POLG	-0.716837	4.88686	-11.0328	1.8792e-26	1.39157e-25	48.9829
C18orf22	-0.501253	2.43523	-11.0283	1.96211e-26	1.45201e-25	48.9402
TRA2A	-0.895522	6.26527	-11.0246	2.03424e-26	1.50341e-25	48.9044
DDX46	-0.635068	4.7048	-11.0204	2.11897e-26	1.56499e-25	48.864
EIF3H	-0.880482	7.29815	-11.0114	2.31003e-26	1.70498e-25	48.7785
TMEM181	-1.00969	3.92734	-11.0097	2.34766e-26	1.73161e-25	48.7625
PQLC3	-1.37983	4.41825	-11.0026	2.51587e-26	1.85446e-25	48.6939
CCR7	-2.35484	6.47264	-10.99	2.83929e-26	2.09148e-25	48.5742
RRP7A	-0.548794	3.07887	-10.9888	2.87309e-26	2.11499e-25	48.5624
EWSR1	-0.725532	5.92281	-10.9879	2.89749e-26	2.13155e-25	48.5541
WIPI1	1.31209	6.33722	10.9827	3.04567e-26	2.23797e-25	48.5047
SLC9A3R1	-0.872397	7.07158	-10.981	3.097e-26	2.27384e-25	48.4881
PSMG2	-0.888651	7.30774	-10.9796	3.1374e-26	2.30199e-25	48.4753
RPL29	-0.854941	10.3799	-10.9792	3.1507e-26	2.31024e-25	48.4711
KTI12	-0.675699	3.09796	-10.9781	3.1846e-26	2.33357e-25	48.4605
CABIN1	-0.648112	3.7186	-10.9758	3.25623e-26	2.3845e-25	48.4385
CTSW	-1.00808	3.49435	-10.9745	3.29645e-26	2.41237e-25	48.4263
C17orf62	0.79074	8.71892	10.9697	3.45331e-26	2.52551e-25	48.3803
CREBL2	-0.858938	4.15409	-10.9666	3.55751e-26	2.60002e-25	48.3508
CBX7	-1.38007	5.5966	-10.9659	3.58007e-26	2.61481e-25	48.3446
SKI	-0.825559	4.41774	-10.9628	3.68944e-26	2.69293e-25	48.3148
FLVCR1	-0.605766	2.54425	-10.9617	3.72896e-26	2.72e-25	48.3042
CCDC14	-0.67551	2.56573	-10.9605	3.77244e-26	2.74993e-25	48.2927
ZNF134	-0.571439	2.63059	-10.9604	3.77693e-26	2.75141e-25	48.2915
SRPRB	-0.746781	3.42357	-10.9527	4.06365e-26	2.95644e-25	48.2191
CCDC45	-0.781965	3.12191	-10.9521	4.08834e-26	2.97247e-25	48.2131
XPA	-0.589838	2.81529	-10.9514	4.11642e-26	2.99094e-25	48.2063
BIRC6	-0.629523	3.31824	-10.9501	4.16834e-26	3.02475e-25	48.1939
CCT8	-1.04082	6.74533	-10.9401	4.58749e-26	3.32459e-25	48.099
SLC39A6	-0.776637	3.04006	-10.9383	4.66634e-26	3.37955e-25	48.0821
ACO1	-0.53839	2.47025	-10.9376	4.69968e-26	3.4015e-25	48.0751
AKAP8	-0.656821	4.6116	-10.935	4.81871e-26	3.4854e-25	48.0503
RAB13	1.27584	4.06393	10.9331	4.90867e-26	3.54589e-25	48.032
SCAP	-0.741831	4.69786	-10.9328	4.92248e-26	3.55357e-25	48.0292
C2CD2	-0.511114	2.36231	-10.932	4.95816e-26	3.57703e-25	48.022
PPP4R2	1.32439	5.81826	10.9279	5.15817e-26	3.71893e-25	47.9829
TTC17	-0.797748	4.60021	-10.9269	5.20973e-26	3.75205e-25	47.973
VPS13C	-1.32249	5.99777	-10.9256	5.27255e-26	3.79407e-25	47.9611
KIAA0947	-1.20659	4.88004	-10.9246	5.32185e-26	3.82709e-25	47.9519
ZNF544	-0.57489	4.11159	-10.922	5.46032e-26	3.92414e-25	47.9265
DYNLT1	0.899816	8.7429	10.9212	5.50011e-26	3.95021e-25	47.9193
CDC42	0.684222	5.76373	10.9165	5.75531e-26	4.1282e-25	47.8744
SMYD3	-0.586143	3.12255	-10.9163	5.76488e-26	4.13242e-25	47.8727
VDAC2	-0.622675	8.04273	-10.9116	6.03299e-26	4.32184e-25	47.8277
EIF4A3	-0.688022	7.17786	-10.9084	6.21725e-26	4.451e-25	47.7979
TP53I3	1.84506	5.50916	10.898	6.86686e-26	4.91292e-25	47.6995
EXOC6	1.26444	5.4354	10.8933	7.18308e-26	5.1326e-25	47.6549
RPS15	-0.711584	10.3847	-10.8931	7.19727e-26	5.13947e-25	47.653
ZW10	-0.701532	3.13364	-10.8905	7.38324e-26	5.2689e-25	47.6277
R3HDM2	-0.826036	6.28336	-10.8836	7.88631e-26	5.62433e-25	47.5624
HDC	-0.668697	2.31349	-10.8814	8.05547e-26	5.74131e-25	47.5414
PPAPDC2	-0.860436	2.85976	-10.8779	8.32374e-26	5.92875e-25	47.509
GART	-0.617186	3.37196	-10.8745	8.5991e-26	6.12098e-25	47.4767
HAUS4	1.08304	6.9627	10.8683	9.12633e-26	6.49215e-25	47.4178
PPIAL4G	-0.752641	2.4764	-10.8667	9.26572e-26	6.58713e-25	47.4028
MBTPS1	-0.59169	3.71796	-10.8655	9.36971e-26	6.65683e-25	47.3917
RANBP3	-0.503603	4.58652	-10.8642	9.49132e-26	6.73895e-25	47.379
CCNL2	-0.652616	4.2384	-10.8635	9.55441e-26	6.77946e-25	47.3724
OSM	0.921648	3.89647	10.8631	9.58687e-26	6.79818e-25	47.3691
GAS7	1.24649	6.19352	10.8604	9.84341e-26	6.97568e-25	47.3429
C5orf62	0.89446	3.5884	10.858	1.00693e-25	7.13127e-25	47.3204
LOC100131541	-1.67147	3.674	-10.8518	1.06823e-25	7.56058e-25	47.2619
SMARCA2	-0.770786	5.0843	-10.8409	1.18545e-25	8.38494e-25	47.1588
B4GALT5	0.746565	5.15979	10.8343	1.26195e-25	8.9204e-25	47.0969
C2orf29	-0.757793	5.63648	-10.8322	1.28797e-25	9.09862e-25	47.0767
BIRC3	-1.54852	4.04401	-10.8229	1.4072e-25	9.92217e-25	46.989
RPL7A	-0.851866	10.0718	-10.8155	1.51052e-25	1.06439e-24	46.9189
AAK1	-0.930115	5.04089	-10.8137	1.53694e-25	1.08233e-24	46.9017
CCNB1IP1	-1.03156	3.69819	-10.8117	1.56565e-25	1.10185e-24	46.8834
DIRC2	1.02173	4.30473	10.8082	1.61859e-25	1.1384e-24	46.8504
MRPS30	-0.886709	3.30335	-10.8072	1.63431e-25	1.14741e-24	46.8409
C18orf32	1.15034	6.78947	10.8072	1.63447e-25	1.14741e-24	46.8408
SNRNP70	-0.597763	4.31967	-10.8062	1.64934e-25	1.15712e-24	46.8318
BATF	1.51421	5.87831	10.8045	1.67752e-25	1.17616e-24	46.815
CCT7	-0.907876	6.22805	-10.8019	1.71824e-25	1.20395e-24	46.7913
MRPL45	-0.716645	3.66459	-10.8018	1.72121e-25	1.20528e-24	46.7896
POGK	-0.526276	4.24304	-10.7934	1.86311e-25	1.30383e-24	46.7111
GEMIN4	-0.558226	2.77281	-10.7921	1.88656e-25	1.31941e-24	46.6987
FUNDC1	-0.943363	4.13909	-10.7879	1.96334e-25	1.37225e-24	46.6592
C10orf137	-0.850902	3.67028	-10.7865	1.98921e-25	1.38947e-24	46.6463
TECR	-1.20539	4.16814	-10.7849	2.02051e-25	1.40957e-24	46.6308
P2RX1	1.31006	6.41711	10.7759	2.20034e-25	1.53408e-24	46.5464
CKAP5	-0.510013	2.78557	-10.7756	2.20765e-25	1.53821e-24	46.5431
MSL3	1.03455	5.27545	10.7753	2.21278e-25	1.54083e-24	46.5408
ADNP	-0.825504	5.57959	-10.7739	2.24296e-25	1.56088e-24	46.5274
LSM1	0.735954	4.76425	10.7725	2.27314e-25	1.5809e-24	46.5142
VPS13A	-0.537449	3.21357	-10.7688	2.35457e-25	1.63652e-24	46.4793
AASDHPPT	-0.833029	4.09546	-10.7604	2.54818e-25	1.76998e-24	46.4011
PPP1R3B	1.18098	6.61711	10.7601	2.5563e-25	1.77453e-24	46.3979
PECR	1.37115	4.58547	10.7597	2.56678e-25	1.78069e-24	46.3939
PRKACB	-1.19507	4.60843	-10.7584	2.5992e-25	1.80207e-24	46.3814
NAGPA	-0.742145	3.53127	-10.7491	2.8374e-25	1.966e-24	46.2946
ZNF75A	-0.645533	2.78291	-10.7487	2.84939e-25	1.97309e-24	46.2905
RPL12	-0.752058	10.6783	-10.7432	2.99967e-25	2.07587e-24	46.2396
LSM4	-0.665723	4.87722	-10.74	3.09281e-25	2.139e-24	46.2093
LOC729678	-0.904772	3.77597	-10.7386	3.13324e-25	2.16563e-24	46.1964
DCPS	-0.710605	4.4635	-10.7365	3.19694e-25	2.20782e-24	46.1765
MRPL10	-0.905706	5.30848	-10.7363	3.20331e-25	2.20997e-24	46.1745
PLEKHG3	-0.955438	6.02769	-10.7342	3.26911e-25	2.25397e-24	46.1544
RPS19	-0.966664	10.0686	-10.7338	3.28097e-25	2.26076e-24	46.1508
FAM3C	-0.77792	2.45069	-10.7278	3.47081e-25	2.3901e-24	46.0951
HLA-DRA	-1.51184	9.94237	-10.7272	3.49081e-25	2.4024e-24	46.0894
CCAR1	-0.772311	5.39959	-10.7154	3.90511e-25	2.68422e-24	45.9784
ZNF805	-0.659737	3.33534	-10.7058	4.2739e-25	2.93591e-24	45.8891
PI4KA	-0.864104	4.64849	-10.7031	4.3858e-25	3.01094e-24	45.8635
ST6GALNAC3	1.66432	3.96115	10.7	4.51485e-25	3.09763e-24	45.8348
SFRS5	-0.967804	5.95894	-10.6938	4.78786e-25	3.28294e-24	45.7766
GNG5	0.561524	11.08	10.6923	4.8567e-25	3.3281e-24	45.7625
MFSD8	-0.929278	3.70123	-10.6904	4.942e-25	3.38242e-24	45.7453
RPL3	-1.05222	9.30852	-10.6871	5.10122e-25	3.48713e-24	45.7139
C2orf43	-0.558037	2.42048	-10.684	5.25152e-25	3.58768e-24	45.6851
TSGA14	-0.556983	2.87407	-10.6834	5.28243e-25	3.6066e-24	45.6793
JARID2	-1.00971	4.83578	-10.6818	5.36062e-25	3.65776e-24	45.6648
AKT3	-0.522182	2.88945	-10.6746	5.74007e-25	3.9119e-24	45.5971
PLIN5	1.41213	5.9425	10.6707	5.95432e-25	4.05546e-24	45.5608
NAP1L1	-1.10722	6.21703	-10.6665	6.19303e-25	4.21547e-24	45.5219
ANKMY2	-0.717856	3.55153	-10.6663	6.20738e-25	4.22268e-24	45.5196
DBR1	-0.534757	2.53591	-10.6659	6.22687e-25	4.23337e-24	45.5165
GTF2H1	-0.633329	4.53284	-10.6622	6.44813e-25	4.38113e-24	45.4819
DPH3	0.960905	5.29574	10.6527	7.05153e-25	4.7882e-24	45.3933
NBAS	-0.554819	3.78549	-10.6491	7.29502e-25	4.95054e-24	45.3597
ZFP82	-0.550781	2.78482	-10.6475	7.41045e-25	5.02279e-24	45.3442
VPS52	-0.605173	4.2867	-10.6467	7.46443e-25	5.05632e-24	45.337
ATP5E	0.66931	10.2097	10.6444	7.62748e-25	5.16364e-24	45.3156
MYL12B	0.554577	9.62947	10.6413	7.85284e-25	5.313e-24	45.2868
LOC728613	-0.710582	3.25345	-10.6385	8.06555e-25	5.45361e-24	45.2603
GTF2F1	-0.572128	3.84913	-10.6376	8.12814e-25	5.49262e-24	45.2527
KIAA0100	-0.686308	5.58839	-10.6373	8.15812e-25	5.50956e-24	45.249
PTPLB	-0.781076	3.42536	-10.6359	8.26367e-25	5.57748e-24	45.2363
N4BP2L1	-0.88818	3.59819	-10.6316	8.60248e-25	5.80266e-24	45.1965
CD79A	-0.819473	3.04394	-10.6313	8.62401e-25	5.81368e-24	45.1941
CBLL1	-1.19796	4.06444	-10.6297	8.75725e-25	5.89995e-24	45.1789
PDPR	-0.625603	3.41616	-10.6274	8.9486e-25	6.02525e-24	45.1575
TRUB1	-0.683866	2.31437	-10.6273	8.95514e-25	6.02603e-24	45.1568
SMC1A	-0.779864	4.44991	-10.6254	9.12184e-25	6.13084e-24	45.1385
INTS4	-0.800204	5.60955	-10.6246	9.19225e-25	6.17446e-24	45.1309
RPA2	-0.922643	6.29757	-10.6146	1.00948e-24	6.77667e-24	45.0382
FH	-0.82913	3.74609	-10.6117	1.03694e-24	6.95679e-24	45.0116
HSF2	-0.509454	2.35563	-10.6093	1.0609e-24	7.11329e-24	44.989
C20orf112	-1.31287	4.66585	-10.6006	1.15131e-24	7.71024e-24	44.908
NTNG2	1.30212	6.28703	10.5865	1.31411e-24	8.78999e-24	44.7771
FNBP1	-0.869294	5.73696	-10.5767	1.44028e-24	9.62246e-24	44.6864
SHMT2	-0.787005	3.28415	-10.5766	1.44138e-24	9.6241e-24	44.6856
C9orf82	-0.589291	2.56578	-10.5665	1.58431e-24	1.05721e-23	44.592
MYOM2	-1.45427	3.18548	-10.5615	1.65988e-24	1.10698e-23	44.5459
NBEAL2	1.10875	6.90709	10.5595	1.69215e-24	1.12783e-23	44.5269
POMP	0.575667	6.04745	10.5581	1.71336e-24	1.14129e-23	44.5145
ZNF337	-0.60537	3.69334	-10.5579	1.71727e-24	1.14259e-23	44.5123
IL18BP	-0.554422	2.68112	-10.5579	1.71736e-24	1.14259e-23	44.5122
TCEAL4	-0.715999	3.23938	-10.557	1.73174e-24	1.15148e-23	44.504
MEF2C	-1.14269	4.38961	-10.5557	1.75309e-24	1.16498e-23	44.4918
CEP110	-0.688332	3.75236	-10.5543	1.77553e-24	1.1792e-23	44.4792
NPC1	-0.61578	2.82167	-10.5488	1.87008e-24	1.24125e-23	44.4279
DHX15	-1.07788	6.03662	-10.5478	1.88783e-24	1.2523e-23	44.4185
CD1C	-0.624278	2.6273	-10.5469	1.90399e-24	1.26227e-23	44.4101
TTC5	-0.600862	4.57516	-10.5461	1.91706e-24	1.27018e-23	44.4033
PLIN3	1.0439	7.79002	10.5457	1.92549e-24	1.27501e-23	44.399
AKAP11	-1.38091	4.42543	-10.545	1.93772e-24	1.28235e-23	44.3927
HDAC1	-0.506906	4.76383	-10.5408	2.01525e-24	1.33209e-23	44.3539
PPTC7	-1.41315	6.2951	-10.5327	2.17348e-24	1.43498e-23	44.2791
TRAPPC5	0.763891	9.79076	10.5271	2.29005e-24	1.51106e-23	44.2274
HSH2D	-1.12944	3.65541	-10.524	2.35792e-24	1.55492e-23	44.1985
MAML2	-1.39102	5.54777	-10.5193	2.462e-24	1.6226e-23	44.1557
EXOSC7	-0.756241	3.41651	-10.5177	2.50091e-24	1.64728e-23	44.1402
DGKZ	-0.643393	5.50744	-10.5175	2.50489e-24	1.64893e-23	44.1386
PMPCA	-0.727539	4.75965	-10.5099	2.68744e-24	1.76806e-23	44.069
YTHDC1	-0.916604	7.0425	-10.5082	2.73114e-24	1.79575e-23	44.053
AKAP9	-0.624624	4.29711	-10.5073	2.75503e-24	1.8104e-23	44.0444
CCNDBP1	0.714137	9.89258	10.5023	2.88716e-24	1.895e-23	43.998
PLEKHF1	-0.757291	3.99532	-10.5007	2.92902e-24	1.92136e-23	43.9838
CNST	-0.565686	3.15031	-10.4978	3.01075e-24	1.97381e-23	43.9566
ATMIN	-0.865158	4.05413	-10.4959	3.063e-24	2.00689e-23	43.9395
SLC5A6	-0.564953	4.05763	-10.4938	3.12499e-24	2.04631e-23	43.9197
MTF1	1.02956	6.3376	10.493	3.1464e-24	2.05913e-23	43.9129
ALOX5AP	0.839884	11.2302	10.491	3.20577e-24	2.09676e-23	43.8944
CTSD	1.03094	6.36091	10.4881	3.29422e-24	2.15335e-23	43.8675
E2F5	-1.03035	2.77599	-10.4872	3.3222e-24	2.17037e-23	43.8591
IRF8	-1.09794	4.94808	-10.4796	3.56464e-24	2.3274e-23	43.7894
RPL13A	-0.918749	10.3692	-10.4787	3.5946e-24	2.3456e-23	43.7811
SDHA	-0.710309	4.67924	-10.4694	3.91959e-24	2.55468e-23	43.6955
NCF4	0.873602	9.54512	10.4666	4.02276e-24	2.61889e-23	43.6698
CYTH3	-0.612077	2.57905	-10.4647	4.0932e-24	2.66319e-23	43.6526
NUP85	-0.755233	3.77297	-10.4623	4.18606e-24	2.72203e-23	43.6304
RBM25	-0.608279	5.33288	-10.4622	4.18952e-24	2.7227e-23	43.6296
GRAMD1A	1.11076	6.43818	10.4605	4.25763e-24	2.76536e-23	43.6136
COPS7B	-0.574815	3.5775	-10.4559	4.44548e-24	2.8857e-23	43.5709
THUMPD3	-0.641334	3.62486	-10.44	5.14827e-24	3.33997e-23	43.4256
SMS	-0.965658	6.6866	-10.4384	5.22599e-24	3.38843e-23	43.4108
ERCC4	-0.540941	2.7076	-10.4383	5.23169e-24	3.39016e-23	43.4097
APOA1BP	-0.818512	4.04437	-10.4278	5.76947e-24	3.73648e-23	43.3129
RABGAP1L	-0.858944	4.20352	-10.4247	5.93418e-24	3.84093e-23	43.285
SFRS13A	-0.819894	3.81109	-10.4172	6.36253e-24	4.1158e-23	43.2161
ZC3H12D	-0.580613	4.19294	-10.4163	6.41779e-24	4.14916e-23	43.2075
LGTN	-0.866148	4.34347	-10.4161	6.42565e-24	4.15185e-23	43.2063
SMEK1	-0.697254	6.72953	-10.4143	6.53324e-24	4.21893e-23	43.1899
FCGR3A	-1.48575	8.5875	-10.4127	6.63368e-24	4.28132e-23	43.1748
MCM3AP	-0.63899	4.09719	-10.4109	6.74291e-24	4.34931e-23	43.1586
VMA21	-1.08507	5.49392	-10.4092	6.84933e-24	4.41542e-23	43.1431
SLC20A1	-0.987082	7.07909	-10.4061	7.05307e-24	4.54414e-23	43.1141
DHX33	-0.665075	3.38172	-10.4051	7.11769e-24	4.58314e-23	43.1051
C14orf1	-0.698291	3.33937	-10.3933	7.93482e-24	5.10343e-23	42.9975
SETD1B	-0.785793	6.27624	-10.3926	7.98953e-24	5.13567e-23	42.9907
MBIP	-0.607753	4.1917	-10.3906	8.13887e-24	5.22866e-23	42.9724
NDUFB1	1.21428	6.94114	10.3882	8.32043e-24	5.34224e-23	42.9506
ECE1	0.840824	5.49374	10.3866	8.44649e-24	5.42008e-23	42.9357
ZNF609	-0.874048	4.18397	-10.3858	8.50361e-24	5.45122e-23	42.929
GIMAP7	-1.45462	7.18152	-10.3752	9.37753e-24	6.00719e-23	42.8322
LDLRAP1	-1.18315	5.75965	-10.3638	1.04204e-23	6.67147e-23	42.7279
SLC35E2	-0.549478	5.83476	-10.3564	1.11558e-23	7.13412e-23	42.6604
TRPM2	0.679103	3.59848	10.3487	1.19825e-23	7.65407e-23	42.5897
XPC	-0.855668	4.38988	-10.348	1.20612e-23	7.69995e-23	42.5832
GZMK	-2.36834	4.40308	-10.3459	1.22974e-23	7.84626e-23	42.564
RPL13	-0.967341	9.69252	-10.3437	1.2541e-23	7.99254e-23	42.5446
IER3	1.335	6.88218	10.3412	1.28407e-23	8.17891e-23	42.5212
SON	-0.5319	5.99841	-10.3388	1.31281e-23	8.35725e-23	42.4993
COX7A2	0.958363	8.45501	10.3343	1.3673e-23	8.6992e-23	42.4591
CECR1	-1.90088	6.22934	-10.3253	1.48537e-23	9.44502e-23	42.3771
C9orf142	-0.51064	3.44093	-10.3163	1.61356e-23	1.02543e-22	42.2952
BAT2L2	-0.73943	6.06514	-10.3155	1.62551e-23	1.03244e-22	42.2879
CHRAC1	-0.628345	5.5313	-10.3121	1.67708e-23	1.06459e-22	42.257
AP3D1	-0.593544	6.80207	-10.3077	1.74719e-23	1.10847e-22	42.2165
QSOX2	-0.597213	2.39137	-10.3035	1.81635e-23	1.15104e-22	42.1781
SLC25A3	-0.679819	8.4157	-10.2981	1.90724e-23	1.20659e-22	42.1298
DKFZp761E198	0.857827	5.68752	10.2972	1.92304e-23	1.2159e-22	42.1216
ECHDC3	2.13526	6.72815	10.2959	1.94776e-23	1.23083e-22	42.109
CLOCK	-0.580059	2.96334	-10.2907	2.04154e-23	1.28937e-22	42.0624
FBRSL1	-0.534741	4.68307	-10.2821	2.2094e-23	1.3946e-22	41.9843
VPS45	-0.656206	3.18598	-10.2797	2.259e-23	1.4251e-22	41.9623
RNF113A	-0.668458	5.52076	-10.2758	2.34143e-23	1.47544e-22	41.9268
SYNE2	-1.09804	4.38175	-10.272	2.42437e-23	1.52685e-22	41.8924
ABCF3	-0.552156	3.94	-10.2705	2.45812e-23	1.54723e-22	41.8787
TMEM206	-0.754872	2.8386	-10.2691	2.49033e-23	1.56663e-22	41.8658
MED17	-0.59425	4.15206	-10.2678	2.51872e-23	1.5836e-22	41.8546
KIAA1267	-0.776125	6.92437	-10.2599	2.70873e-23	1.70115e-22	41.7827
HNRNPAB	-0.869792	6.09668	-10.2594	2.72138e-23	1.70814e-22	41.7781
BPI	2.88414	5.67758	10.2593	2.72303e-23	1.70822e-22	41.7775
NSA2	-1.08317	7.35787	-10.2556	2.81736e-23	1.7664e-22	41.7438
KIAA1377	-0.916605	2.69326	-10.2555	2.81946e-23	1.76673e-22	41.743
TAF1	-0.553399	3.19426	-10.2534	2.87483e-23	1.80043e-22	41.7238
DDOST	-0.797035	6.96807	-10.2502	2.9586e-23	1.85082e-22	41.6954
TCL1A	-1.4319	3.65387	-10.2282	3.61774e-23	2.26189e-22	41.4964
CREG1	1.2262	7.36809	10.2247	3.7376e-23	2.33553e-22	41.4642
GSTO1	0.924961	8.91699	10.2243	3.75023e-23	2.34212e-22	41.4608
ITM2A	-1.55729	5.31631	-10.2238	3.76897e-23	2.35251e-22	41.4559
STXBP2	1.18782	4.63343	10.2235	3.77837e-23	2.35706e-22	41.4534
TGFBRAP1	-0.646025	2.98654	-10.2205	3.88264e-23	2.42076e-22	41.4265
ZNF211	-0.658326	3.224	-10.2168	4.01788e-23	2.50369e-22	41.3926
ACTR1A	0.574823	5.54661	10.212	4.19761e-23	2.61278e-22	41.3493
SIN3A	-0.59928	3.28037	-10.2097	4.284e-23	2.66507e-22	41.3292
SRP72	-0.810669	6.07112	-10.2032	4.54774e-23	2.82757e-22	41.2701
C9orf89	0.915287	7.0924	10.1997	4.69418e-23	2.91701e-22	41.2387
TUFM	-0.777278	7.27682	-10.1972	4.8045e-23	2.9839e-22	41.2157
LYRM4	-0.542629	2.49346	-10.1968	4.81798e-23	2.99062e-22	41.213
FERMT3	0.841996	7.44312	10.1964	4.83801e-23	3.00139e-22	41.2089
FBXO30	1.45514	5.8239	10.1959	4.85869e-23	3.01255e-22	41.2047
C7orf70	-0.651828	2.66004	-10.1948	4.90722e-23	3.04096e-22	41.1948
AFG3L2	-0.620382	2.93485	-10.1945	4.92088e-23	3.04774e-22	41.1921
C1orf109	-0.688176	3.58318	-10.1901	5.12406e-23	3.17182e-22	41.152
SPTBN1	-1.30974	6.34719	-10.1894	5.15499e-23	3.18921e-22	41.1461
SFRS18	-0.622144	5.33277	-10.1863	5.3039e-23	3.27952e-22	41.1179
DGCR6	-0.672078	3.96789	-10.1836	5.43338e-23	3.35772e-22	41.0941
PDE8A	-0.623694	3.16247	-10.1828	5.4768e-23	3.38083e-22	41.0862
HNRNPK	-0.63121	7.95281	-10.1825	5.48856e-23	3.38622e-22	41.0841
DRAM1	1.32738	4.07651	10.1824	5.49334e-23	3.38731e-22	41.0832
PLGLB2	-0.854016	2.88244	-10.1742	5.92285e-23	3.65014e-22	41.0087
CDC42EP3	1.01714	8.87237	10.1697	6.16633e-23	3.79602e-22	40.9689
ADHFE1	-0.591172	3.21217	-10.1693	6.19314e-23	3.81043e-22	40.9646
RAP2B	-0.529836	5.61411	-10.1657	6.39795e-23	3.93428e-22	40.9324
ACVR1B	0.882432	5.19944	10.1592	6.78421e-23	4.1675e-22	40.8744
TOMM22	-0.662206	5.29108	-10.1592	6.78464e-23	4.1675e-22	40.8744
METTL11A	-0.503034	3.71061	-10.1586	6.82683e-23	4.19111e-22	40.8682
FAM100B	0.726099	6.02424	10.1579	6.86691e-23	4.21341e-22	40.8624
SIGLEC5	1.2795	8.37064	10.1499	7.38281e-23	4.52748e-22	40.7908
CEACAM1	2.23444	5.84019	10.1434	7.83734e-23	4.80359e-22	40.7317
SPIN1	-0.515563	3.47924	-10.1397	8.09932e-23	4.96144e-22	40.6992
FCGR1A	1.21701	4.74526	10.1381	8.21803e-23	5.03141e-22	40.6848
ALOX5	1.14552	7.94351	10.1322	8.66952e-23	5.30493e-22	40.6319
FAM98A	-0.877429	3.89372	-10.1242	9.32241e-23	5.70132e-22	40.5601
RPS13	-0.724236	10.4312	-10.1235	9.38156e-23	5.73437e-22	40.5538
ATP5A1	-0.856846	7.4022	-10.1179	9.87597e-23	6.03328e-22	40.503
RPL5	-1.09983	8.18184	-10.1067	1.09311e-22	6.67422e-22	40.4026
TJAP1	-0.583895	4.54609	-10.1056	1.10341e-22	6.73344e-22	40.3933
BEX4	-1.23272	4.82216	-10.1043	1.11628e-22	6.80828e-22	40.3819
GRSF1	-0.825754	4.80954	-10.0976	1.1866e-22	7.23325e-22	40.3214
RARRES3	-2.02469	5.85112	-10.0952	1.21288e-22	7.38942e-22	40.2998
STAT5B	0.940001	7.37448	10.0928	1.23956e-22	7.54784e-22	40.2783
FAM159A	-0.511548	2.73171	-10.0875	1.30038e-22	7.91118e-22	40.2309
WDR18	-0.533578	3.03542	-10.0874	1.30064e-22	7.91118e-22	40.2307
ZNF281	0.968991	7.74056	10.0823	1.3627e-22	8.28413e-22	40.1846
DNAJC5	0.637734	5.2379	10.0817	1.36984e-22	8.32302e-22	40.1794
RUNX2	-1.56584	4.66597	-10.0806	1.38376e-22	8.40304e-22	40.1694
TRAPPC6A	-0.816197	3.85503	-10.0804	1.38632e-22	8.41407e-22	40.1676
SLC25A43	-0.721006	2.74288	-10.0784	1.41079e-22	8.55791e-22	40.1503
APEH	-0.593852	5.39911	-10.0757	1.44628e-22	8.76523e-22	40.1257
HIST2H2AC	0.576837	2.97126	10.0757	1.44653e-22	8.76523e-22	40.1255
NCRNA00219	-1.07053	4.40367	-10.0751	1.45442e-22	8.80829e-22	40.1202
REV3L	-0.835051	3.52402	-10.0733	1.47795e-22	8.94592e-22	40.1043
MRFAP1L1	-1.1407	4.36889	-10.0704	1.51754e-22	9.18065e-22	40.0781
SF3B2	-0.744311	5.84207	-10.0694	1.53038e-22	9.2483e-22	40.0698
BTN2A2	-0.756147	2.96438	-10.0688	1.53981e-22	9.3003e-22	40.0637
C19orf63	-0.721185	8.40095	-10.0624	1.63051e-22	9.84281e-22	40.0071
JMJD6	0.838956	4.14163	10.0592	1.67884e-22	1.01291e-21	39.9782
CD47	-0.882578	6.12291	-10.0591	1.68068e-22	1.01347e-21	39.9772
SNRPB	-0.654646	7.22345	-10.0588	1.68514e-22	1.01562e-21	39.9745
C3AR1	1.624	8.57617	10.0529	1.77612e-22	1.06987e-21	39.9225
KLHL20	-0.542358	3.10559	-10.0504	1.81775e-22	1.09436e-21	39.8996
B3GNT5	2.17978	5.56783	10.0485	1.84893e-22	1.11253e-21	39.8828
RANGAP1	-0.890559	4.02408	-10.0446	1.9151e-22	1.15173e-21	39.848
PLK1S1	-0.657833	4.12742	-10.0414	1.97109e-22	1.18477e-21	39.8195
AMPD2	-0.653205	4.12384	-10.0356	2.07615e-22	1.24725e-21	39.7682
NNT	-0.721021	2.96135	-10.0349	2.08854e-22	1.25402e-21	39.7623
UBTD1	0.565599	3.80437	10.0346	2.09564e-22	1.25761e-21	39.7589
ACSL5	-1.03495	4.39492	-10.0267	2.25044e-22	1.34978e-21	39.6885
BRIX1	-0.72525	2.88557	-10.0237	2.31134e-22	1.38557e-21	39.662
TRAF3IP3	-0.849528	5.84261	-10.0218	2.35139e-22	1.40882e-21	39.6451
TMEM167B	0.728696	6.87165	10.0216	2.35566e-22	1.41062e-21	39.6433
SFPQ	-0.992341	5.84588	-10.0195	2.39953e-22	1.43536e-21	39.625
TRMT112	-0.561782	8.48453	-10.0134	2.53604e-22	1.51621e-21	39.5703
RHOH	-1.46669	5.15901	-10.0103	2.60747e-22	1.55809e-21	39.5428
DNAJC2	-0.87004	3.85715	-10.0089	2.64039e-22	1.57692e-21	39.5304
ENOPH1	-1.29058	4.56128	-10.0074	2.67523e-22	1.59687e-21	39.5175
SLC9A8	0.871923	5.77034	9.99863	2.89504e-22	1.72624e-21	39.4394
SLC26A6	0.764688	4.19585	9.99737	2.92818e-22	1.74507e-21	39.4281
TMEM223	-0.74151	4.29583	-9.99268	3.05407e-22	1.81913e-21	39.3865
ALPK1	0.875088	4.73546	9.98819	3.17968e-22	1.89294e-21	39.3466
OLAH	2.84314	4.72558	9.98415	3.297e-22	1.96174e-21	39.3108
SPTLC2	1.17322	7.1317	9.98314	3.32696e-22	1.97852e-21	39.3019
C1orf21	-0.795304	2.83305	-9.97151	3.69261e-22	2.1948e-21	39.1988
CTDSPL2	-0.810146	4.14166	-9.9646	3.92854e-22	2.3338e-21	39.1375
VAV2	-0.633309	3.13492	-9.96398	3.95038e-22	2.34552e-21	39.132
CASP6	-0.636753	3.33992	-9.96029	4.08281e-22	2.42159e-21	39.0994
C10orf57	-0.60129	4.8424	-9.95992	4.09669e-22	2.42854e-21	39.0961
TRPM7	-0.887858	2.76415	-9.95662	4.2192e-22	2.49852e-21	39.0669
PIGM	-0.797921	3.61398	-9.95652	4.22299e-22	2.49944e-21	39.066
ATP6V1C1	1.45267	6.20284	9.9528	4.36628e-22	2.58288e-21	39.033
HDAC9	-0.853891	3.04919	-9.95128	4.42597e-22	2.61681e-21	39.0196
C19orf60	-0.870384	4.04911	-9.94478	4.69092e-22	2.772e-21	38.9621
SH3BP1	-0.648491	6.39149	-9.94007	4.8927e-22	2.88971e-21	38.9205
INPP4A	-0.858565	5.46731	-9.93539	5.10171e-22	3.01157e-21	38.8791
GBA	1.07394	5.27984	9.93451	5.14174e-22	3.0336e-21	38.8714
CSTA	1.08846	9.10386	9.93162	5.27647e-22	3.11145e-21	38.8458
TMEM167A	1.03585	6.79486	9.93116	5.29798e-22	3.12249e-21	38.8418
ZC3H6	-0.855766	3.77889	-9.92868	5.4169e-22	3.18923e-21	38.8199
DUSP5	-1.06436	2.8434	-9.92697	5.50005e-22	3.23478e-21	38.8048
HNRNPUL2	-0.695489	5.56884	-9.92639	5.5289e-22	3.25004e-21	38.7996
C17orf70	-0.590825	3.02988	-9.92329	5.68393e-22	3.33942e-21	38.7723
TRANK1	-1.15307	3.30829	-9.92211	5.74419e-22	3.37305e-21	38.7619
PHB	-0.596241	3.94566	-9.91932	5.88917e-22	3.45638e-21	38.7372
PRKCA	-1.20941	4.79582	-9.91378	6.18738e-22	3.6295e-21	38.6884
CAPN2	-0.900704	4.98127	-9.91242	6.26267e-22	3.66982e-21	38.6764
PPBP	1.60554	10.5945	9.9056	6.65585e-22	3.89818e-21	38.6162
NSUN6	-0.980233	5.19189	-9.90438	6.72835e-22	3.93858e-21	38.6055
GTDC1	0.84874	4.06192	9.89764	7.1448e-22	4.18018e-21	38.5461
PSME1	-0.788062	8.56021	-9.89653	7.21606e-22	4.21966e-21	38.5363
CLASP2	-0.510764	3.15832	-9.89457	7.34354e-22	4.29197e-21	38.519
CNOT2	-0.619449	5.46276	-9.89002	7.64727e-22	4.46716e-21	38.4789
C6orf48	-1.09335	6.98187	-9.8882	7.77191e-22	4.5376e-21	38.4629
KANK1	-0.687884	2.56653	-9.88691	7.86175e-22	4.58766e-21	38.4516
LOC100128751	-1.08764	6.11304	-9.88542	7.96677e-22	4.64652e-21	38.4385
CXCR6	-0.871209	3.04126	-9.8793	8.41239e-22	4.90132e-21	38.3846
GLMN	-0.515543	2.65266	-9.87917	8.42237e-22	4.90458e-21	38.3835
NSMCE4A	-0.730915	3.9011	-9.8767	8.60949e-22	5.01095e-21	38.3618
MS4A4A	1.61354	4.2611	9.87565	8.68995e-22	5.05515e-21	38.3526
STIM2	-0.685044	3.04449	-9.87113	9.04661e-22	5.2599e-21	38.3128
TRUB2	-0.503981	3.24418	-9.86863	9.25036e-22	5.37557e-21	38.2908
SFRS6	-0.781375	5.32179	-9.86662	9.41677e-22	5.46944e-21	38.2731
RBM34	-0.984767	4.85097	-9.86341	9.68925e-22	5.62479e-21	38.2449
SEMA4A	1.09393	6.55226	9.85752	1.02096e-21	5.92378e-21	38.1932
TRIM24	-0.729191	3.19367	-9.85536	1.04075e-21	6.03547e-21	38.1742
SEPX1	0.698725	10.9585	9.85437	1.04994e-21	6.08564e-21	38.1656
EIF3M	-0.947738	5.8714	-9.84745	1.1165e-21	6.46476e-21	38.1048
TBC1D8	1.51249	5.82043	9.84272	1.16439e-21	6.73855e-21	38.0633
PLCXD1	-0.591359	2.71827	-9.83364	1.26198e-21	7.29956e-21	37.9837
RPL38	-0.638633	8.83143	-9.8328	1.27149e-21	7.34694e-21	37.9763
EIF4A2	-0.861693	4.31229	-9.83042	1.29853e-21	7.49549e-21	37.9555
SPI1	0.625215	3.95284	9.82877	1.31765e-21	7.60192e-21	37.941
LDHA	1.16263	9.91993	9.8282	1.32432e-21	7.63649e-21	37.936
NBPF8	-0.73278	5.02638	-9.82763	1.3311e-21	7.67161e-21	37.931
UBE3A	-0.568631	4.37087	-9.82707	1.33771e-21	7.7018e-21	37.9261
MLLT11	-0.693537	3.32738	-9.825	1.36246e-21	7.84028e-21	37.908
HCST	-0.776276	8.28072	-9.82418	1.37235e-21	7.89314e-21	37.9008
FLJ10213	1.11847	6.76856	9.82093	1.41245e-21	8.11957e-21	37.8724
STX17	-0.551897	3.12956	-9.81906	1.43608e-21	8.25122e-21	37.8559
IDH3B	-0.676392	4.99967	-9.81865	1.44135e-21	8.27724e-21	37.8523
MEF2A	1.14672	5.67672	9.81746	1.45657e-21	8.36035e-21	37.8419
PGM3	-0.667606	2.90847	-9.81499	1.48879e-21	8.54089e-21	37.8203
MRPL16	-0.796878	6.09638	-9.81435	1.49717e-21	8.58023e-21	37.8148
ORC3L	-0.512706	2.91359	-9.81011	1.55457e-21	8.90459e-21	37.7776
TCN1	2.64446	7.41104	9.80829	1.57979e-21	9.04446e-21	37.7617
HERPUD1	-0.587403	7.12328	-9.80716	1.5956e-21	9.13027e-21	37.7518
SLBP	-1.10173	4.82683	-9.79996	1.70049e-21	9.72552e-21	37.6889
UBE2E2	-0.826848	3.33631	-9.79696	1.74628e-21	9.98233e-21	37.6626
RBM43	-0.781504	2.47864	-9.79351	1.80042e-21	1.02865e-20	37.6324
FAM160B1	0.725859	5.25622	9.79216	1.82194e-21	1.04042e-20	37.6207
BAT5	0.527828	5.83099	9.789	1.87354e-21	1.06934e-20	37.5931
PFKFB2	1.86393	4.01065	9.78547	1.93281e-21	1.10261e-20	37.5623
WSB1	1.17272	5.98144	9.78441	1.95099e-21	1.11241e-20	37.553
CCNK	-0.652523	6.00406	-9.77921	2.04284e-21	1.16362e-20	37.5076
RAB8B	0.750699	6.40738	9.77863	2.05322e-21	1.16891e-20	37.5026
ISG20L2	-0.737859	5.92836	-9.77287	2.16035e-21	1.22803e-20	37.4523
RPL8	-0.731194	9.67817	-9.76763	2.26261e-21	1.28551e-20	37.4066
RPP38	-0.616357	3.45184	-9.76738	2.26747e-21	1.28762e-20	37.4045
C14orf101	0.984046	4.54162	9.76363	2.34384e-21	1.32964e-20	37.3717
UBP1	-0.944088	5.98792	-9.7615	2.38832e-21	1.3535e-20	37.3531
EIF4ENIF1	-0.734859	3.98323	-9.76014	2.41703e-21	1.36908e-20	37.3413
ZCCHC8	-0.731503	5.13009	-9.7573	2.47824e-21	1.40304e-20	37.3166
CREB1	-0.664533	5.42251	-9.75624	2.50164e-21	1.41557e-20	37.3073
FAF1	-0.639705	3.9576	-9.74734	2.70567e-21	1.53026e-20	37.2298
SLC30A5	-0.58685	2.76512	-9.74705	2.71248e-21	1.53333e-20	37.2273
MICAL1	1.02476	7.14091	9.74419	2.78164e-21	1.57084e-20	37.2025
ATP5D	-0.748739	5.63013	-9.74345	2.79984e-21	1.58032e-20	37.196
ACVR2A	-0.578422	2.61065	-9.74121	2.85569e-21	1.61104e-20	37.1765
PHF21A	0.706035	5.64704	9.74073	2.86773e-21	1.61701e-20	37.1723
SLC39A10	-1.08578	3.59558	-9.74013	2.88304e-21	1.62483e-20	37.1671
TMEM91	0.771016	5.4509	9.73578	2.9954e-21	1.6873e-20	37.1293
TPST2	0.974491	7.71206	9.73528	3.00866e-21	1.69392e-20	37.1249
MTMR3	0.506667	4.70099	9.73037	3.1415e-21	1.76782e-20	37.0822
TMEM66	-1.06516	7.25832	-9.72204	3.38009e-21	1.90017e-20	37.0099
APOBEC3G	-1.00838	6.23935	-9.71936	3.46056e-21	1.94444e-20	36.9866
RPS27A	-0.753879	10.0575	-9.71668	3.5431e-21	1.98982e-20	36.9633
NXT1	-1.09685	4.60846	-9.71324	3.65174e-21	2.04981e-20	36.9335
TFCP2	-0.570335	3.02477	-9.71298	3.66022e-21	2.05354e-20	36.9312
KLF11	-0.852027	3.01343	-9.70992	3.75979e-21	2.10834e-20	36.9046
ORM1	1.86525	5.53576	9.70934	3.77896e-21	2.11803e-20	36.8996
DUSP6	-1.30692	7.69701	-9.7053	3.91547e-21	2.19345e-20	36.8645
BOD1	-0.672066	3.49704	-9.70418	3.9541e-21	2.21398e-20	36.8548
CHD1L	-0.998181	4.72437	-9.70265	4.00766e-21	2.24285e-20	36.8415
JAKMIP1	-0.676187	2.42258	-9.70243	4.01547e-21	2.2461e-20	36.8396
NLRP1	-1.22583	4.30433	-9.70105	4.06451e-21	2.27239e-20	36.8276
PPM1G	-0.582213	4.82947	-9.6973	4.20037e-21	2.34718e-20	36.7951
RABEP1	-0.683053	3.93489	-9.69499	4.28623e-21	2.39397e-20	36.7751
ZSCAN29	-0.581581	2.88081	-9.69296	4.3632e-21	2.43452e-20	36.7575
ZNF787	0.695707	4.81034	9.68402	4.71905e-21	2.63177e-20	36.68
YWHAQ	-1.07306	5.55884	-9.67725	5.00713e-21	2.79104e-20	36.6215
KIAA0753	-0.504671	2.68858	-9.67629	5.04938e-21	2.81319e-20	36.6132
ZNF232	-0.537669	2.4807	-9.6716	5.26138e-21	2.92985e-20	36.5725
EXOSC8	-1.17689	4.29645	-9.66875	5.39422e-21	3.00084e-20	36.5479
C1orf123	-0.637764	5.6722	-9.66633	5.50955e-21	3.06347e-20	36.527
TMIGD2	-0.51455	2.92154	-9.6649	5.57914e-21	3.10063e-20	36.5146
HLA-DOB	-0.864571	2.84044	-9.66148	5.74853e-21	3.19318e-20	36.485
GLS	-0.96295	3.96739	-9.64851	6.43845e-21	3.57288e-20	36.373
RPS8	-0.853411	9.14247	-9.6461	6.57578e-21	3.64728e-20	36.3522
SLC25A5	-0.798571	7.85682	-9.64596	6.58389e-21	3.64997e-20	36.3509
KIAA1429	-0.565401	5.74418	-9.64458	6.66344e-21	3.69224e-20	36.3391
SQRDL	0.803783	9.60592	9.63544	7.21711e-21	3.99706e-20	36.2602
TRAF3IP2	-0.59576	3.9313	-9.6347	7.264e-21	4.02104e-20	36.2538
ASAP1	0.750888	7.2949	9.63171	7.45565e-21	4.12509e-20	36.2281
DDX21	-0.973161	6.58074	-9.62711	7.7615e-21	4.29007e-20	36.1883
ADCY7	-0.838068	4.98721	-9.62125	8.16849e-21	4.51059e-20	36.1378
TLR7	-0.628561	2.5667	-9.61974	8.27653e-21	4.56799e-20	36.1249
LUC7L3	-0.73617	5.40719	-9.61792	8.40886e-21	4.63874e-20	36.1092
FNDC3B	0.90861	4.93337	9.60679	9.26502e-21	5.10853e-20	36.0134
SNAP47	-0.567489	4.3207	-9.6003	9.8035e-21	5.40277e-20	35.9576
GIMAP4	-1.56162	7.53191	-9.59892	9.92194e-21	5.46536e-20	35.9457
SLPI	1.96568	7.56452	9.58822	1.089e-20	5.99272e-20	35.8537
TRAPPC10	-0.651868	4.70398	-9.58057	1.16393e-20	6.4019e-20	35.7879
U2AF1L4	-0.514097	4.55221	-9.57843	1.18577e-20	6.51566e-20	35.7696
HNRNPH3	-0.958778	5.58762	-9.57463	1.22548e-20	6.73055e-20	35.737
MOSC1	1.44741	6.52981	9.5674	1.30494e-20	7.1634e-20	35.675
CRTC3	-1.11426	6.07853	-9.56438	1.33956e-20	7.34986e-20	35.6491
SRM	-0.924863	4.33042	-9.56371	1.34744e-20	7.38947e-20	35.6433
PHB2	-0.712905	6.84663	-9.55887	1.40524e-20	7.7027e-20	35.6018
WDR6	-0.761629	5.1606	-9.5574	1.42317e-20	7.79718e-20	35.5893
UQCR11	0.510098	6.32207	9.55519	1.45077e-20	7.9445e-20	35.5703
MPV17	-0.943344	5.65646	-9.5545	1.45952e-20	7.98847e-20	35.5644
MAL	-1.60364	5.59259	-9.5501	1.5162e-20	8.29469e-20	35.5267
EIF4E3	0.993396	6.74693	9.54542	1.57898e-20	8.6297e-20	35.4866
C12orf57	-1.41018	5.75413	-9.54286	1.6144e-20	8.81467e-20	35.4647
GNL3L	-0.761438	6.17874	-9.54049	1.64789e-20	8.99316e-20	35.4444
TIMP1	1.08957	8.84158	9.52951	1.81219e-20	9.8802e-20	35.3505
MYBPC3	0.618434	4.01857	9.52912	1.81846e-20	9.90953e-20	35.3471
SURF6	-0.536356	3.27004	-9.52901	1.82012e-20	9.91375e-20	35.3462
CRTAP	-0.757158	4.35616	-9.52697	1.85247e-20	1.00851e-19	35.3288
EIF3G	-0.588664	5.75578	-9.52578	1.87174e-20	1.0185e-19	35.3186
ABCB7	-0.919081	4.28328	-9.5257	1.87302e-20	1.0187e-19	35.3179
LYSMD2	-1.62416	6.09407	-9.5255	1.87625e-20	1.01997e-19	35.3162
DVL2	-0.544522	4.32448	-9.52404	1.90017e-20	1.03247e-19	35.3037
OCIAD1	-0.652125	6.68112	-9.52275	1.92143e-20	1.04351e-19	35.2927
CHCHD8	-0.812422	5.61315	-9.51873	1.98932e-20	1.07986e-19	35.2584
RABGAP1	-0.636423	5.96373	-9.51604	2.03628e-20	1.10482e-19	35.2353
ASCL2	-0.671854	3.84221	-9.51591	2.03858e-20	1.10553e-19	35.2342
PPP1CC	-0.895628	6.96088	-9.51349	2.08158e-20	1.12831e-19	35.2136
CENPC1	-0.623917	2.81546	-9.50999	2.14557e-20	1.16242e-19	35.1837
ASS1	-0.529752	2.37166	-9.50335	2.27211e-20	1.22979e-19	35.1271
MZF1	-0.52022	4.85159	-9.5025	2.28899e-20	1.23833e-19	35.1198
TMSB10	-0.671754	10.3617	-9.50138	2.31109e-20	1.24968e-19	35.1103
EEF1A1	-0.510085	9.02217	-9.49788	2.38213e-20	1.28685e-19	35.0804
HYLS1	-0.640759	3.1689	-9.49612	2.41855e-20	1.3059e-19	35.0654
CCL5	-1.53743	8.66807	-9.49179	2.51059e-20	1.35299e-19	35.0285
COX19	-0.514356	3.60447	-9.49173	2.51187e-20	1.35303e-19	35.028
GALNT14	1.59381	4.07872	9.49136	2.51997e-20	1.35674e-19	35.0248
SFT2D1	0.661621	7.9254	9.48659	2.62579e-20	1.41303e-19	34.9842
FEM1C	1.16676	4.77145	9.48393	2.68675e-20	1.44514e-19	34.9615
TMCC1	-0.788068	4.1927	-9.47906	2.80199e-20	1.50641e-19	34.92
GLUD1	-0.684004	5.35455	-9.47768	2.83542e-20	1.52365e-19	34.9083
SURF2	-0.541935	2.5566	-9.47246	2.96586e-20	1.59145e-19	34.8639
RPRD1B	-0.692191	3.75512	-9.47028	3.02211e-20	1.62008e-19	34.8453
MRPL17	-0.713039	3.29218	-9.46519	3.15754e-20	1.69187e-19	34.802
CCDC92	-0.939466	5.36246	-9.45962	3.31266e-20	1.7733e-19	34.7546
RPL10	-0.696588	8.37922	-9.45188	3.54062e-20	1.89261e-19	34.6889
AGTRAP	0.930246	7.75034	9.44848	3.64572e-20	1.94707e-19	34.66
ACN9	1.3714	5.1915	9.44847	3.64597e-20	1.94707e-19	34.6599
ALDH3A2	-0.53354	3.66718	-9.44061	3.9008e-20	2.08216e-19	34.5932
RRM1	-0.674405	2.85736	-9.44055	3.90284e-20	2.08226e-19	34.5927
CLEC5A	1.03135	3.25553	9.43899	3.95535e-20	2.10927e-19	34.5795
BTG1	-0.799682	9.51953	-9.43797	3.99037e-20	2.12693e-19	34.5708
ZCCHC7	-0.630365	3.77834	-9.4355	4.07587e-20	2.17147e-19	34.5498
ZNF562	-0.730916	6.15638	-9.43407	4.12623e-20	2.19621e-19	34.5377
USP20	-0.603474	3.31917	-9.42911	4.30571e-20	2.29065e-19	34.4956
DGKQ	-0.877322	3.90198	-9.42809	4.34356e-20	2.30969e-19	34.487
ABCC1	-0.637164	4.31121	-9.42574	4.43195e-20	2.35446e-19	34.4671
BMI1	-0.793784	4.7714	-9.42213	4.57156e-20	2.42632e-19	34.4365
[truncated: 1,650 more rows]
